# Supplementary material
Source: PubMed Central journal article supplement (PMC7112117)
Supplement: mmc2.pdf [file mmc2.pdf]

**Supplementary Table 1. List of Quantifiable and Non-Quantifiable  
Grouped by KOG Category**

| <b>Protein ID</b>                                                       | <b>Protein name</b>                                                  | <b>L/H ratio</b> |
|-------------------------------------------------------------------------|----------------------------------------------------------------------|------------------|
| <b>INFORMATION STORAGE AND PROCESSING</b>                               |                                                                      |                  |
| <b>KOG category [J] Translation, ribosomal structure and biogenesis</b> |                                                                      |                  |
| IPI00217030                                                             | RPS4X 40S ribosomal protein S4, X isoform                            | 1.43             |
| IPI00428288                                                             | MRPL43 Isoform 4 of 39S ribosomal protein L43, mitochondrial         | 0.77             |
| IPI00456940                                                             | RPL7L1 60S ribosomal protein L7-like 1                               | 0.85             |
| IPI00029731                                                             | RPL35A 60S ribosomal protein L35a                                    | 0.84             |
| IPI00219155                                                             | RPL27 60S ribosomal protein L27                                      | 1.3              |
| IPI00783097                                                             | GARS Glycyl-tRNA synthetase                                          | 2.05             |
| IPI00025050                                                             | WARS2 Isoform 1 of Tryptophanyl-tRNA synthetase, mitochondrial       | 1.15             |
| IPI00031801                                                             | CSDA Isoform 1 of DNA-binding protein A                              | 1.72             |
| IPI00048572                                                             | PTRH1 Similar to Tetratricopeptide repeat protein 16                 | 1.32             |
| IPI00619930                                                             | PUS1 Isoform 1 of tRNA pseudouridine synthase A, mitochondrial       | 1.01             |
| IPI00334914                                                             | TRMT1L Isoform 1 of TRMT1-like protein                               | 0.94             |
| IPI00307409                                                             | MRPL9 39S ribosomal protein L9, mitochondrial                        | 1.35             |
| IPI00008485                                                             | ACO1 Cytoplasmic aconitate hydratase                                 | 1.68             |
| IPI00011077                                                             | MRPL32 39S ribosomal protein L32, mitochondrial precursor            | 2.43             |
| IPI00027443                                                             | CARS cysteinyl-tRNA synthetase, cytoplasmic isoform c                | 1.66             |
| IPI00007175                                                             | NIP7 Isoform 1 of 60S ribosome subunit biogenesis protein NIP7 hom 1 |                  |
| IPI00216587                                                             | RPS8;SNORD55 40S ribosomal protein S8                                | 0.84             |
| IPI00013485                                                             | RPS2 40S ribosomal protein S2                                        | 1.45             |
| IPI00295400                                                             | WARS Isoform 1 of Tryptophanyl-tRNA synthetase, cytoplasmic          | 2.57             |
| IPI00031661                                                             | NOC4L Nucleolar complex protein 4 homolog                            | 1.82             |
| IPI00032872                                                             | MRPS16 28S ribosomal protein S16, mitochondrial                      | 1.64             |
| IPI00106698                                                             | PELO Protein pelota homolog                                          | 1.24             |
| IPI00604620                                                             | NCL Nucleolin                                                        | 0.82             |
| IPI00297982                                                             | EIF2S3 Eukaryotic translation initiation factor 2 subunit 3          | 1.53             |
| IPI00873899                                                             | ABCF1 Isoform 1 of ATP-binding cassette sub-family F member 1        | 0.92             |
| IPI00247583                                                             | RPL21;SNORD102;SNORA27;RPL21P19 60S ribosomal protein L21            | 0.74             |
| IPI00062151                                                             | Ribosomal protein L15                                                | 0.76             |
| IPI00555744                                                             | RPL14 Ribosomal protein L14 variant                                  | 1.18             |
| IPI00927658                                                             | RPL32 Uncharacterized protein                                        | 1.14             |
| IPI00219153                                                             | RPL22 60S ribosomal protein L22                                      | 1.04             |
| IPI00746351                                                             | DIS3 Isoform 1 of Exosome complex exonuclease RRP44                  | 1.05             |
| IPI00007144                                                             | RPL26L1 60S ribosomal protein L26-like 1                             | 0.84             |
| IPI00009680                                                             | MRPL44 39S ribosomal protein L44, mitochondrial                      | 1.03             |
| IPI00215780                                                             | RPS19 40S ribosomal protein S19                                      | 0.89             |
| IPI00465160                                                             | ABCF3 Isoform 1 of ATP-binding cassette sub-family F member 3        | 1.26             |
| IPI00916503                                                             | BZW1 cDNA FLJ55789, highly similar to Rattus norvegicus basic leu    | 1.3              |
| IPI00550021                                                             | SNORD43;RPL3 60S ribosomal protein L3                                | 1.05             |
| IPI00032823                                                             | EXOSC1 Exosome complex component CSL4                                | 1.39             |
| IPI00215790                                                             | RPL38 60S ribosomal protein L38                                      | 0.86             |
| IPI00027096                                                             | MRPL19 39S ribosomal protein L19, mitochondrial                      | 0.6              |
| IPI00745433                                                             | EIF2C2 Isoform 1 of Protein argonaute-2                              | 1.44             |
| IPI00216237                                                             | RPL36 60S ribosomal protein L36                                      | 0.92             |
| IPI00219156                                                             | RPL30 60S ribosomal protein L30                                      | 0.95             |
| IPI00644708                                                             | TIAL1 nucleolysin TIAR isoform 2                                     | 0.98             |
| IPI00006970                                                             | MRPS2 Mitochondrial 28S ribosomal protein S2                         | 0.78             |
| IPI00306290                                                             | XPOT Exportin-T                                                      | 2.06             |
| IPI00549566                                                             | RARS2 Probable arginyl-tRNA synthetase, mitochondrial                | 0.68             |
| IPI00165092                                                             | YARS2 Tyrosyl-tRNA synthetase, mitochondrial                         | 1.53             |
| IPI00414860                                                             | RPL37A 60S ribosomal protein L37a                                    | 0.76             |
| IPI00031691                                                             | RPL9 60S ribosomal protein L9                                        | 0.83             |

|             |                                                                       |      |
|-------------|-----------------------------------------------------------------------|------|
| IPI00795627 | MRPL3 cDNA FLJ51883, highly similar to Mitochondrial 39S ribosome     | 0.71 |
| IPI00090720 | QRSL1 Isoform 1 of Glutamyl-tRNA(Gln) amidotransferase subunit A      | 0.56 |
| IPI00418290 | MRPL14 39S ribosomal protein L14, mitochondrial                       | 1.46 |
| IPI00160421 | MRPL18 39S ribosomal protein L18, mitochondrial                       | 0.69 |
| IPI00419880 | SNORD73A;RPS3A 40S ribosomal protein S3a                              | 0.94 |
| IPI00027270 | RPL26 60S ribosomal protein L26                                       | 1.34 |
| IPI00015952 | EIF4G2 cDNA FLJ59571, highly similar to Eukaryotic translation ini    | 0.75 |
| IPI00010105 | EIF6 Eukaryotic translation initiation factor 6                       | 1.75 |
| IPI00552920 | EXOSC8 Exosome complex component RRP43                                | 0.77 |
| IPI00102815 | NOC3L Nucleolar complex protein 3 homolog                             | 1.45 |
| IPI00335589 | RNMTL1 RNA methyltransferase-like protein 1                           | 1.62 |
| IPI00300074 | FARSB Phenylalanyl-tRNA synthetase beta chain                         | 1.29 |
| IPI00006440 | MRPS7 28S ribosomal protein S7, mitochondrial                         | 1.24 |
| IPI00181728 | BRX1 Ribosome biogenesis protein BRX1 homolog                         | 0.91 |
| IPI00376005 | EIF5A Isoform 2 of Eukaryotic translation initiation factor 5A-1      | 1.44 |
| IPI00306723 | CEBPZ CCAAT/enhancer-binding protein zeta                             | 0.82 |
| IPI00411937 | SNORD110;SNORD86;NOP56 Nucleolar protein 56                           | 1.5  |
| IPI00217553 | MRPL41 39S ribosomal protein L41, mitochondrial                       | 1.33 |
| IPI00465233 | EIF3L Uncharacterized protein                                         | 0.85 |
| IPI00031820 | FARSA Phenylalanyl-tRNA synthetase alpha chain                        | 1.03 |
| IPI00396329 | RPF2 Ribosome production factor 2 homolog                             | 0.91 |
| IPI00744211 | EIF4E2 Eukaryotic translation initiation factor 4E type 2             | 1.2  |
| IPI00012750 | RPS25 40S ribosomal protein S25                                       | 0.84 |
| IPI00790292 | MRPL45 cDNA FLJ61100, highly similar to 39S ribosomal protein L       | 2.22 |
| IPI00006504 | EIF2B3 Isoform 1 of Translation initiation factor eIF-2B subunit gam  | 1.01 |
| IPI00014253 | RRS1 Ribosome biogenesis regulatory protein homolog                   | 1.68 |
| IPI00010153 | RPL23 60S ribosomal protein L23                                       | 1.71 |
| IPI00028083 | EIF2B2 Translation initiation factor eIF-2B subunit beta              | 0.93 |
| IPI00927163 | SARS2;FBXO17 seryl-tRNA synthetase, mitochondrial isoform a prec      | 1.88 |
| IPI00298618 | EIF1AD Probable RNA-binding protein EIF1AD                            | 2.2  |
| IPI00983659 | EIF2B4 Uncharacterized protein                                        | 1.58 |
| IPI00376798 | RPL11 Isoform 1 of 60S ribosomal protein L11                          | 1.31 |
| IPI00008530 | RPLP0 60S acidic ribosomal protein P0                                 | 1.48 |
| IPI00221089 | RPS13 40S ribosomal protein S13                                       | 1.44 |
| IPI00022613 | NOP14 Isoform 1 of Nucleolar protein 14                               | 0.94 |
| IPI00289807 | TRNT1 Isoform 1 of CCA tRNA nucleotidyltransferase 1, mitochondr      | 1.15 |
| IPI00185919 | LARP1 Isoform 1 of La-related protein 1                               | 1    |
| IPI00012772 | RPL8 60S ribosomal protein L8                                         | 1.03 |
| IPI00163851 | EIF2AK4 Isoform 1 of Eukaryotic translation initiation factor 2-alpha | 1.92 |
| IPI00170935 | LRRC47 Leucine-rich repeat-containing protein 47                      | 1.23 |
| IPI00456758 | RPL27A 60S ribosomal protein L27a                                     | 1.48 |
| IPI00479058 | RPS15 40S ribosomal protein S15                                       | 3.58 |
| IPI00008437 | RSL24D1 Probable ribosome biogenesis protein RLP24                    | 0.87 |
| IPI00154473 | GFM1 Isoform 1 of Elongation factor G, mitochondrial                  | 0.86 |
| IPI00411816 | MRPL2 39S ribosomal protein L2, mitochondrial                         | 0.81 |
| IPI00956559 | EIF4G1 eukaryotic translation initiation factor 4 gamma 1 isoform 6   | 1.36 |
| IPI00470528 | RPL15 60S ribosomal protein L15                                       | 1.14 |
| IPI00186290 | EEF2 Elongation factor 2                                              | 0.8  |
| IPI00719622 | RPS28 40S ribosomal protein S28                                       | 0.91 |
| IPI00221093 | RPS17;RPS17L 40S ribosomal protein S17                                | 1.34 |
| IPI00216951 | DARS Aspartyl-tRNA synthetase, cytoplasmic                            | 1.15 |
| IPI00328268 | EIF4G3 eukaryotic translation initiation factor 4 gamma 3 isoform 1   | 4.46 |
| IPI00179026 | MCTS1 Isoform 1 of Malignant T cell-amplified sequence 1              | 1.14 |
| IPI00012462 | EIF2A Eukaryotic translation initiation factor 2A                     | 1.2  |
| IPI00021840 | RPS6 40S ribosomal protein S6                                         | 1.08 |
| IPI00099871 | MRPL40 39S ribosomal protein L40, mitochondrial                       | 1.96 |
| IPI00219160 | RPL34 60S ribosomal protein L34                                       | 0.79 |

|             |                                                                      |      |
|-------------|----------------------------------------------------------------------|------|
| IPI00965726 | EIF4E eukaryotic translation initiation factor 4E isoform 2          | 0.95 |
| IPI00007001 | MRPL11 Isoform 1 of 39S ribosomal protein L11, mitochondrial         | 0.7  |
| IPI00414410 | MRPL22 26 kDa protein                                                | 0.84 |
| IPI00014198 | EXOSC7 Exosome complex component RRP42                               | 0.71 |
| IPI00019463 | EIF2AK2 Interferon-induced, double-stranded RNA-activated protein    | 1.96 |
| IPI00013068 | EIF3E Eukaryotic translation initiation factor 3 subunit E           | 0.79 |
| IPI00021808 | HARS Histidyl-tRNA synthetase, cytoplasmic                           | 0.8  |
| IPI00009464 | EXOSC10 Isoform 1 of Exosome component 10                            | 1.06 |
| IPI00296563 | GUF1 Translation factor GUF1, mitochondrial                          | 1.24 |
| IPI00005948 | MRI1 Isoform 1 of Methylthioribose-1-phosphate isomerase             | 0.63 |
| IPI00644775 | EXOSC5 Exosome complex exonuclease RRP46                             | 0.73 |
| IPI00029012 | EIF3A Eukaryotic translation initiation factor 3 subunit A           | 0.88 |
| IPI00790342 | RPL6 60S ribosomal protein L6                                        | 1.35 |
| IPI00025491 | EIF4A1 Eukaryotic initiation factor 4A-I                             | 0.69 |
| IPI00018120 | DAP3 28S ribosomal protein S29, mitochondrial                        | 1.24 |
| IPI00745613 | EXOSC4 Exosome complex component RRP41                               | 0.86 |
| IPI00216999 | C14orf21 Pumilio domain-containing protein C14orf21                  | 1.01 |
| IPI00783197 | TRMT61A tRNA (adenine-N(1)-)-methyltransferase catalytic subunit     | 1.24 |
| IPI00409717 | MIR1248;SNORA4;SNORD2;EIF4A2;SNORA81;SNORA63 Isoform                 | 1.22 |
| IPI00009444 | MRPL27 39S ribosomal protein L27, mitochondrial                      | 1.06 |
| IPI00023334 | MRPL4 Isoform 1 of 39S ribosomal protein L4, mitochondrial           | 1.67 |
| IPI00014238 | KARS Isoform Cytoplasmic of Lysyl-tRNA synthetase                    | 1.02 |
| IPI00006379 | NOP58 Nucleolar protein 58                                           | 1.05 |
| IPI00024933 | RPL12 Isoform 1 of 60S ribosomal protein L12                         | 1.24 |
| IPI00013296 | RPS18;RPS18P9 40S ribosomal protein S18                              | 1.05 |
| IPI00299573 | RPL7A;SNORD24 60S ribosomal protein L7a                              | 1.1  |
| IPI00746004 | RPS27L 40S ribosomal protein S27-like                                | 1.27 |
| IPI00022403 | MRPL13 39S ribosomal protein L13, mitochondrial                      | 1.12 |
| IPI00893746 | NHP2L1 Uncharacterized protein                                       | 1.56 |
| IPI00005038 | HRSP12 Ribonuclease UK114                                            | 0.91 |
| IPI00412579 | RPL10A 60S ribosomal protein L10a                                    | 0.89 |
| IPI00032355 | PUM1 Uncharacterized protein                                         | 1.55 |
| IPI00172591 | MRPL17 39S ribosomal protein L17, mitochondrial                      | 0.94 |
| IPI00008438 | RPS10 40S ribosomal protein S10                                      | 1.19 |
| IPI00221300 | EIF2B1 Translation initiation factor eIF-2B subunit alpha            | 0.86 |
| IPI00169400 | MRPS5 Isoform 1 of 28S ribosomal protein S5, mitochondrial           | 1.05 |
| IPI00014213 | LARS2 Probable leucyl-tRNA synthetase, mitochondrial                 | 1.35 |
| IPI00031489 | EIF1B Eukaryotic translation initiation factor 1b                    | 2.03 |
| IPI00375824 | DPH5 Isoform 5 of Diphthine synthase                                 | 0.81 |
| IPI00015956 | EXOSC3 Exosome complex component RRP40                               | 1.47 |
| IPI00006935 | EIF5A2 Eukaryotic translation initiation factor 5A-2                 | 1.73 |
| IPI00021466 | PAIP1 Isoform 1 of Polyadenylate-binding protein-interacting protein | 1.12 |
| IPI00221088 | RPS9 40S ribosomal protein S9                                        | 1.09 |
| IPI00221394 | SNORA56;DKC1 H/ACA ribonucleoprotein complex subunit 4               | 1.9  |
| IPI00012795 | EIF3I Eukaryotic translation initiation factor 3 subunit I           | 0.83 |
| IPI00290461 | EIF3J Eukaryotic translation initiation factor 3 subunit J           | 1.21 |
| IPI00001640 | N6AMT1 Isoform 1 of HemK methyltransferase family member 2           | 1.14 |
| IPI00027445 | HARS2 Probable histidyl-tRNA synthetase, mitochondrial               | 1.55 |
| IPI00014424 | EEF1A2 Elongation factor 1-alpha 2                                   | 3.03 |
| IPI00853161 | SNORA70;RPL10 60S ribosomal protein L10                              | 1.03 |
| IPI00103341 | TRUB1 Probable tRNA pseudouridine synthase 1                         | 1.65 |
| IPI00793201 | AIMP1 aminoacyl tRNA synthase complex-interacting multifunctiona     | 1.6  |
| IPI00009328 | EIF4A3 Eukaryotic initiation factor 4A-III                           | 0.87 |
| IPI00028955 | BOP1 Ribosome biogenesis protein BOP1                                | 1.12 |
| IPI00465176 | C2orf15;MRPL30 Isoform 2 of 39S ribosomal protein L30, mitochond     | 1.41 |
| IPI00412607 | RPL35 60S ribosomal protein L35                                      | 0.74 |
| IPI00218606 | RPS23 40S ribosomal protein S23                                      | 1.23 |

|             |                                                                     |      |
|-------------|---------------------------------------------------------------------|------|
| IPI00427330 | SBDS Ribosome maturation protein SBDS                               | 1.25 |
| IPI00006099 | BMS1 Ribosome biogenesis protein BMS1 homolog                       | 0.99 |
| IPI00514587 | SARS Uncharacterized protein                                        | 1.58 |
| IPI00005039 | MTIF2 Translation initiation factor IF-2, mitochondrial             | 1.09 |
| IPI00291398 | TIA1 Isoform Long of Nucleolysin TIA-1 isoform p40                  | 0.79 |
| IPI00290460 | EIF3G Eukaryotic translation initiation factor 3 subunit G          | 1.09 |
| IPI00000821 | MRPL16 39S ribosomal protein L16, mitochondrial                     | 1.37 |
| IPI00550037 | MRPS15 28S ribosomal protein S15, mitochondrial                     | 0.93 |
| IPI00103994 | LARS Leucyl-tRNA synthetase, cytoplasmic                            | 1.15 |
| IPI00000494 | SNORD21;RPL5 60S ribosomal protein L5                               | 0.94 |
| IPI00303944 | NSUN4 Isoform 1 of Putative methyltransferase NSUN4                 | 0.76 |
| IPI00017448 | RPS21 40S ribosomal protein S21                                     | 0.83 |
| IPI00106549 | DPH2 Diphthamide biosynthesis protein 2                             | 1.4  |
| IPI00797406 | NMD3 Uncharacterized protein                                        | 0.71 |
| IPI00003519 | EFTUD2 116 kDa U5 small nuclear ribonucleoprotein component         | 1.52 |
| IPI00031812 | YBX1 Nuclease-sensitive element-binding protein 1                   | 1.22 |
| IPI00022305 | BZW2 Basic leucine zipper and W2 domain-containing protein 2        | 0.63 |
| IPI00221092 | RPS16 40S ribosomal protein S16                                     | 1.19 |
| IPI00219678 | EIF2S1 Eukaryotic translation initiation factor 2 subunit 1         | 0.84 |
| IPI00910513 | GSPT1 eukaryotic peptide chain release factor GTP-binding subunit E | 0.89 |
| IPI00465361 | RPL13 60S ribosomal protein L13                                     | 1.16 |
| IPI00029114 | ICT1 Peptidyl-tRNA hydrolase ICT1, mitochondrial                    | 0.92 |
| IPI00028390 | MRPL34 39S ribosomal protein L34, mitochondrial                     | 1.05 |
| IPI00216260 | TSFM Isoform 2 of Elongation factor Ts, mitochondrial               | 0.84 |
| IPI00073602 | EXOSC6 Exosome complex component MTR3                               | 1.26 |
| IPI00655650 | RPS26 40S ribosomal protein S26                                     | 0.86 |
| IPI00306332 | RPL24 60S ribosomal protein L24                                     | 0.79 |
| IPI00005050 | MRPS14 28S ribosomal protein S14, mitochondrial                     | 1.06 |
| IPI00299254 | EIF5B Eukaryotic translation initiation factor 5B                   | 1.69 |
| IPI00647650 | EIF3H cDNA FLJ35809 fis, clone TESTI2006016, highly similar to E    | 0.84 |
| IPI00011898 | EIF2B5 Translation initiation factor eIF-2B subunit epsilon         | 1.35 |
| IPI00011253 | RPS3 40S ribosomal protein S3                                       | 1.08 |
| IPI00152692 | DTD1 D-tyrosyl-tRNA(Tyr) deacylase 1                                | 1.54 |
| IPI00001159 | GCN1L1 Translational activator GCN1                                 | 1.27 |
| IPI00306960 | NARS Asparaginyl-tRNA synthetase, cytoplasmic                       | 1.43 |
| IPI00304612 | SNORD32A;RPL13A;SNORD33;SNORD34 60S ribosomal protein L             | 0.85 |
| IPI00062839 | MARS2 Methionyl-tRNA synthetase, mitochondrial                      | 1.88 |
| IPI00037619 | RPL39P5 Putative 60S ribosomal protein L39-like 5                   | 2.26 |
| IPI00019195 | RPP38 Ribonuclease P protein subunit p38                            | 1.47 |
| IPI00013160 | EIF2D Isoform 1 of Eukaryotic translation initiation factor 2D      | 2.29 |
| IPI01020905 | RPL18 Protein                                                       | 1.39 |
| IPI00061108 | MRRF Isoform 1 of Ribosome-recycling factor, mitochondrial          | 0.81 |
| IPI00329633 | TARS Threonyl-tRNA synthetase, cytoplasmic                          | 1.28 |
| IPI01015060 | MRPL12;SLC25A10 39S ribosomal protein L12, mitochondrial            |      |
| IPI00008527 | RPLP1 60S acidic ribosomal protein P1                               | 2.77 |
| IPI00221091 | RPS15A 40S ribosomal protein S15a                                   | 0.89 |
| IPI00419919 | RPL29;RPL29P4 Ribosomal protein L29                                 | 1.3  |
| IPI00029697 | EXOSC9 Isoform 2 of Exosome complex component RRP45                 | 0.76 |
| IPI00010244 | MRPS11 Isoform 1 of 28S ribosomal protein S11, mitochondrial        | 1.1  |
| IPI00022648 | EIF5 Eukaryotic translation initiation factor 5                     | 0.64 |
| IPI00021728 | EIF2S2 Eukaryotic translation initiation factor 2 subunit 2         | 0.91 |
| IPI00642904 | PABPC4 polyadenylate-binding protein 4 isoform 1                    | 0.94 |
| IPI00073779 | MRPS35 Isoform 1 of 28S ribosomal protein S35, mitochondrial        | 2.36 |
| IPI00107563 | POP5 Ribonuclease P/MRP protein subunit POP5                        | 0.88 |
| IPI00925046 | QARS Glutaminyl-tRNA synthetase                                     | 1.06 |
| IPI00023086 | MRPL15 39S ribosomal protein L15, mitochondrial                     | 1.27 |
| IPI00646839 | EIF3C;EIF3CL Uncharacterized protein                                | 0.81 |

|             |                                                                         |       |
|-------------|-------------------------------------------------------------------------|-------|
| IPI00061245 | MRPS10 28S ribosomal protein S10, mitochondrial                         | 0.78  |
| IPI00027442 | AARS Alanyl-tRNA synthetase, cytoplasmic                                | 1.46  |
| IPI00015077 | EIF1 Eukaryotic translation initiation factor 1                         | 1.22  |
| IPI00917298 | RPL31 cDNA FLJ57527, highly similar to 60S ribosomal protein L31        | 1.31  |
| IPI00429191 | ETF1 Eukaryotic peptide chain release factor subunit 1                  | 0.91  |
| IPI00413108 | SNORA6;RPSAP15;SNORA62;RPSA 33 kDa protein                              | 1.34  |
| IPI00027107 | TUFM elongation factor Tu, mitochondrial precursor                      | 1.7   |
| IPI00644127 | IARS Isoleucyl-tRNA synthetase, cytoplasmic                             | 1.21  |
| IPI00013917 | RPS12 40S ribosomal protein S12                                         | 0.83  |
| IPI00304409 | CARHSP1 Calcium-regulated heat stable protein 1                         | 1.74  |
| IPI00232533 | EIF1AX Eukaryotic translation initiation factor 1A, X-chromosomal       | 0.78  |
| IPI00641924 | MRPS9 28S ribosomal protein S9, mitochondrial                           | 0.69  |
| IPI00179330 | RPS27A Ubiquitin-40S ribosomal protein S27a                             | 1.69  |
| IPI00967202 | EIF4E2 Eukaryotic translation initiation factor 4E member 2 variant (   | 0.79  |
| IPI00654777 | EIF3F cDNA FLJ36192 fis, clone TESTI2027450, highly similar to E        | 1.26  |
| IPI00005692 | MRPS12 28S ribosomal protein S12, mitochondrial                         | 2.06  |
| IPI00008529 | RPLP2 60S acidic ribosomal protein P2                                   | 1.07  |
| IPI00878912 | TRMT2A Uncharacterized protein                                          | 1.19  |
| IPI00008433 | RPS5 40S ribosomal protein S5                                           | 0.94  |
| IPI00604527 | TARS2 Threonyl-tRNA synthetase, mitochondrial                           | 1.31  |
| IPI00394788 | AARS2 Alanyl-tRNA synthetase, mitochondrial                             | 1.17  |
| IPI00880048 | DIS3L2 Isoform 1 of DIS3-like exonuclease 2                             | 2.5   |
| IPI00293476 | MRPL23 39S ribosomal protein L23, mitochondrial                         | 1.34  |
| IPI00396485 | EEF1A1 Elongation factor 1-alpha 1                                      | 1.05  |
| IPI00876864 | RPP30 ribonuclease P protein subunit p30 isoform a                      | 1.47  |
| IPI00302740 | RPS4Y1 40S ribosomal protein S4, Y isoform 1                            | 10.22 |
| IPI00008524 | PABPC1 Isoform 1 of Polyadenylate-binding protein 1                     | 0.8   |
| IPI00746438 | RPL11 Isoform 2 of 60S ribosomal protein L11                            | 1.45  |
| IPI00940410 | TSEN34 tRNA-splicing endonuclease subunit Sen34                         | 0.93  |
| IPI00156032 | KRR1 KRR1 small subunit processome component homolog                    | 1.65  |
| IPI00006864 | MRPL33 39S ribosomal protein L33, mitochondrial                         | 1     |
| IPI00182289 | RPS29 40S ribosomal protein S29                                         | 1.15  |
| IPI00099311 | TRMT6 Isoform 1 of tRNA (adenine-N(1)-)-methyltransferase non-ca        | 0.92  |
| IPI00013415 | RPS7 40S ribosomal protein S7                                           | 1.24  |
| IPI00026202 | RPL18A 60S ribosomal protein L18a                                       | 0.8   |
| IPI00411886 | NOC2L Nucleolar complex protein 2 homolog                               | 0.87  |
| IPI00030179 | RPL7P32;RPL7 60S ribosomal protein L7                                   | 0.91  |
| IPI00026271 | RPS14 40S ribosomal protein S14                                         | 1.56  |
| IPI00170877 | MRPL10 39S ribosomal protein L10, mitochondrial isoform b               | 0.82  |
| IPI00020508 | TRMT1 Isoform 1 of N(2),N(2)-dimethylguanosine tRNA methyltran          | 1.11  |
| IPI00719752 | EIF3B Isoform 2 of Eukaryotic translation initiation factor 3 subunit F | 0.86  |
| IPI00302176 | GAR1 Isoform 1 of H/ACA ribonucleoprotein complex subunit 1             | 0.9   |
| IPI00025091 | RPS11 40S ribosomal protein S11                                         | 0.96  |
| IPI00025329 | RPL19 60S ribosomal protein L19                                         | 0.79  |
| IPI00006181 | EIF3D Eukaryotic translation initiation factor 3 subunit D              | 0.83  |

---

**KOG category [A] RNA processing and modification**

|             |                                                                  |      |
|-------------|------------------------------------------------------------------|------|
| IPI00102425 | RPRD1A Isoform 1 of Regulation of nuclear pre-mRNA domain-cont   | 1.41 |
| IPI00013070 | HNRNPUL1 Isoform 1 of Heterogeneous nuclear ribonucleoprotein U  | 1.42 |
| IPI00004459 | DIMT1 Probable dimethyladenosine transferase                     | 0.92 |
| IPI00394668 | ADAR Isoform 4 of Double-stranded RNA-specific adenosine deamin  | 1.28 |
| IPI00007605 | NXT1 NTF2-related export protein 1                               | 0.83 |
| IPI00219306 | MAGOH Protein mago nashi homolog                                 | 0.97 |
| IPI00010204 | SRSF3 Serine/arginine-rich splicing factor 3                     | 3.44 |
| IPI00893746 | NHP2L1 Uncharacterized protein                                   | 1.56 |
| IPI00646917 | NUDT21 Cleavage and polyadenylation specificity factor subunit 5 | 1.41 |
| IPI00005861 | PRPF3 U4/U6 small nuclear ribonucleoprotein Prp3                 | 0.93 |
| IPI00017580 | KIN DNA/RNA-binding protein KIN17                                |      |

|             |                                                                  |      |
|-------------|------------------------------------------------------------------|------|
| IPI01009595 | SRSF2 25 kDa protein                                             | 1.14 |
| IPI00464952 | SRSF11 Serine/arginine-rich splicing factor 11                   | 1.66 |
| IPI00396435 | DHX15 Putative pre-mRNA-splicing factor ATP-dependent RNA heli   | 0.88 |
| IPI00008557 | IGF2BP1 Insulin-like growth factor 2 mRNA-binding protein 1      | 1.99 |
| IPI00871240 | SCAF8 cDNA FLJ56906, highly similar to RNA-binding protein 16    | 0.87 |
| IPI00019488 | IMP3 U3 small nucleolar ribonucleoprotein protein IMP3           | 1.1  |
| IPI00100151 | XRN2 Isoform 1 of 5'-3' exoribonuclease 2                        | 1.59 |
| IPI00000015 | SRSF4 Serine/arginine-rich splicing factor 4                     | 2.77 |
| IPI00008485 | ACO1 Cytoplasmic aconitate hydratase                             | 1.68 |
| IPI00302281 | DDX56 Probable ATP-dependent RNA helicase DDX56                  | 1.29 |
| IPI00915400 | ROD1 Isoform 4 of Regulator of differentiation 1                 | 1.83 |
| IPI00003768 | PES1 Isoform 1 of Pescadillo homolog                             | 0.91 |
| IPI00215637 | DDX3X ATP-dependent RNA helicase DDX3X                           | 0.7  |
| IPI00328840 | THOC4 THO complex subunit 4                                      | 0.89 |
| IPI00032460 | LSM2 U6 snRNA-associated Sm-like protein LSm2                    | 0.77 |
| IPI00012382 | SNRPA U1 small nuclear ribonucleoprotein A                       | 1.69 |
| IPI00008575 | KHDRBS1 Isoform 1 of KH domain-containing, RNA-binding, signal   | 1.24 |
| IPI00013721 | PRPF4B Serine/threonine-protein kinase PRP4 homolog              | 1.18 |
| IPI00384028 | PAPOLA cDNA FLJ56176, highly similar to Poly(A) polymerase alp1  | 1.79 |
| IPI00855912 | PUF60 Isoform 6 of Poly(U)-binding-splicing factor PUF60         | 0.75 |
| IPI00984962 | CELF1 55 kDa protein                                             | 0.95 |
| IPI00930241 | EBNA1BP2 probable rRNA-processing protein EBP2 isoform 1         | 1.49 |
| IPI00106567 | WDR33 Isoform 1 of WD repeat-containing protein 33               | 0.96 |
| IPI00012202 | WDR77 Methylosome protein 50                                     | 0.89 |
| IPI00005792 | PABPN1 Isoform 1 of Polyadenylate-binding protein 2              | 0.99 |
| IPI00604620 | NCL Nucleolin                                                    | 0.82 |
| IPI00784161 | SUPT6H Isoform 1 of Transcription elongation factor SPT6         | 1.56 |
| IPI00030320 | DDX6 Probable ATP-dependent RNA helicase DDX6                    | 1.54 |
| IPI00479191 | HNRNPH1 51 kDa protein                                           | 1.36 |
| IPI00477971 | TBL3 Transducin beta-like protein 3                              | 1.06 |
| IPI00181702 | SCAF4 Isoform 1 of Splicing factor, arginine/serine-rich 15      | 1.61 |
| IPI00176706 | RBM17 Splicing factor 45                                         | 0.81 |
| IPI00293078 | DDX27 Probable ATP-dependent RNA helicase DDX27                  | 1.06 |
| IPI00332428 | MAK16 Protein MAK16 homolog                                      | 0.82 |
| IPI00071318 | LUC7L Isoform 1 of Putative RNA-binding protein Luc7-like 1      | 0.47 |
| IPI00029267 | SNRNPB U2 small nuclear ribonucleoprotein B"                     | 0.74 |
| IPI00017617 | DDX5 Probable ATP-dependent RNA helicase DDX5                    | 0.49 |
| IPI00219229 | LSM3 U6 snRNA-associated Sm-like protein LSm3                    | 2.55 |
| IPI00026089 | SF3B1 Splicing factor 3B subunit 1                               | 1.37 |
| IPI00902991 | CSTF2 BetaCstF-64 variant 2                                      | 1.4  |
| IPI00164672 | DCP1A mRNA-decapping enzyme 1A                                   | 1.3  |
| IPI00419531 | CPSF2 Cleavage and polyadenylation specificity factor subunit 2  | 0.98 |
| IPI00020683 | DUSP11 RNA/RNP complex-1-interacting phosphatase                 | 0.48 |
| IPI00783271 | LRPPRC Leucine-rich PPR motif-containing protein, mitochondrial  | 0.73 |
| IPI00183626 | PTBP1 polypyrimidine tract-binding protein 1 isoform a           | 1.6  |
| IPI00001146 | LSM6 U6 snRNA-associated Sm-like protein LSm6                    | 0.92 |
| IPI00031556 | U2AF2 Isoform 1 of Splicing factor U2AF 65 kDa subunit           | 1.54 |
| IPI00414819 | SKIV2L Helicase SKI2W                                            | 2.18 |
| IPI00023409 | UPF3B Isoform 1 of Regulator of nonsense transcripts 3B          | 1.05 |
| IPI00654555 | NOP2 Uncharacterized protein                                     | 0.98 |
| IPI00015195 | CSTF3 Cleavage stimulation factor subunit 3                      | 0.92 |
| IPI00165230 | DAZAP1 Isoform 1 of DAZ-associated protein 1                     | 1.29 |
| IPI00744858 | ISY1-RAB43;ISY1 Isoform 2 of Pre-mRNA-splicing factor ISY1 hom   | 1.02 |
| IPI00006552 | CNOT7 CCR4-NOT transcription complex subunit 7                   | 0.87 |
| IPI00967258 | LUC7L3 cDNA FLJ77715, highly similar to Homo sapiens cisplatin r | 0.71 |
| IPI00150269 | PRPF4 Isoform 1 of U4/U6 small nuclear ribonucleoprotein Prp4    | 1.27 |
| IPI00007928 | PRPF8 Pre-mRNA-processing-splicing factor 8                      | 0.95 |

|             |                                                                      |       |
|-------------|----------------------------------------------------------------------|-------|
| IPI00300504 | UPF2 Isoform 1 of Regulator of nonsense transcripts 2                | 1.89  |
| IPI00410110 | DHX40 Isoform 1 of Probable ATP-dependent RNA helicase DHX40         | 1.52  |
| IPI00939523 | DDX46 DEAD (Asp-Glu-Ala-Asp) box polypeptide 46, isoform CRA_        | 0.96  |
| IPI00375462 | SREK1 Isoform 2 of Splicing regulatory glutamine/lysine-rich protein | 2.51  |
| IPI00294211 | DHX38 Pre-mRNA-splicing factor ATP-dependent RNA helicase PRI        | 0.73  |
| IPI00019918 | DDX19A ATP-dependent RNA helicase DDX19A                             | 0.94  |
| IPI00291398 | TIA1 Isoform Long of Nucleolysin TIA-1 isoform p40                   | 0.79  |
| IPI00640040 | 68 kDa protein                                                       | 12.77 |
| IPI00034049 | UPF1 Isoform 1 of Regulator of nonsense transcripts 1                | 1.09  |
| IPI00644708 | TIAL1 nucleolysin TIAR isoform 2                                     | 0.98  |
| IPI00152304 | RBM46 Probable RNA-binding protein 46                                | 0.76  |
| IPI00003394 | SMN2;SMN1 Isoform SMN of Survival motor neuron protein               | 0.88  |
| IPI00440688 | POLDIP3 cDNA FLJ54030, highly similar to Polymerase delta-intera     | 1.29  |
| IPI00221106 | SF3B2 Splicing factor 3B subunit 2                                   | 1.42  |
| IPI00152510 | DDX54 Isoform 2 of ATP-dependent RNA helicase DDX54                  | 1.13  |
| IPI00006987 | DDX24 ATP-dependent RNA helicase DDX24                               | 2.06  |
| IPI00292000 | PRPF31 Isoform 1 of U4/U6 small nuclear ribonucleoprotein Prp31      | 0.79  |
| IPI00430472 | ASCC3 Activating signal cointegrator 1 complex subunit 3             | 0.89  |
| IPI00150963 | RPUSD2 RNA pseudouridylate synthase domain-containing protein 2      | 3.94  |
| IPI00926109 | DHX30 Isoform 2 of Putative ATP-dependent RNA helicase DHX30         | 0.9   |
| IPI00395337 | FIP1L1 Isoform 1 of Pre-mRNA 3'-end-processing factor FIP1           | 1.53  |
| IPI00019380 | NCBP1 Nuclear cap-binding protein subunit 1                          | 0.93  |
| IPI00000162 | NGDN Isoform 1 of Neuroguidin                                        | 1.23  |
| IPI00009032 | SSB Lupus La protein                                                 | 0.88  |
| IPI00465294 | CDC5L Cell division cycle 5-like protein                             | 1.71  |
| IPI00034069 | TFB2M Dimethyladenosine transferase 2, mitochondrial                 | 2.06  |
| IPI00015924 | TFIP11 Isoform 1 of Tuftelin-interacting protein 11                  | 0.82  |
| IPI00015905 | EXOSC2 Exosome complex component RRP4                                | 0.65  |
| IPI00033561 | RNPS1 Isoform 1 of RNA-binding protein with serine-rich domain 1     | 1.84  |
| IPI00009755 | METTL3 Isoform 1 of N6-adenosine-methyltransferase 70 kDa subun      | 1.16  |
| IPI00007208 | DDX41 Probable ATP-dependent RNA helicase DDX41                      | 0.73  |
| IPI00552073 | DHX16 Putative pre-mRNA-splicing factor ATP-dependent RNA heli       | 0.66  |
| IPI00183500 | NCBP2 Isoform 1 of Nuclear cap-binding protein subunit 2             | 0.88  |
| IPI00303207 | ABCE1 ATP-binding cassette sub-family E member 1                     | 1.2   |
| IPI00217157 | DDX59 Isoform 1 of Probable ATP-dependent RNA helicase DDX59         | 2.37  |
| IPI00297900 | DDX10 Probable ATP-dependent RNA helicase DDX10                      | 0.62  |
| IPI00017963 | SNRPD2 Small nuclear ribonucleoprotein Sm D2                         | 1.57  |
| IPI00010740 | SFPQ Isoform Long of Splicing factor, proline- and glutamine-rich    | 0.99  |
| IPI00032853 | NOP10 H/ACA ribonucleoprotein complex subunit 3                      | 0.88  |
| IPI00025176 | SMNDC1 Survival of motor neuron-related-splicing factor 30           | 0.95  |
| IPI00294879 | RANGAP1 Ran GTPase-activating protein 1                              | 0.81  |
| IPI00300371 | SF3B3 Isoform 1 of Splicing factor 3B subunit 3                      | 0.9   |
| IPI00032791 | POP4 Ribonuclease P protein subunit p29                              | 1.41  |
| IPI00011528 | CSTF1 Cleavage stimulation factor subunit 1                          | 0.79  |
| IPI00848161 | SNORD84;DDX39B Isoform 1 of Spliceosome RNA helicase DDX39 1         |       |
| IPI00019195 | RPP38 Ribonuclease P protein subunit p38                             | 1.47  |
| IPI00006025 | SART3 Isoform 1 of Squamous cell carcinoma antigen recognized by     | 1.39  |
| IPI00013830 | SNW1 SNW domain-containing protein 1                                 | 1.69  |
| IPI00647217 | SKIV2L2 Superkiller viralicidic activity 2-like 2                    | 1.32  |
| IPI00156005 | NOVA2 RNA-binding protein Nova-2                                     | 2.13  |
| IPI00297477 | SNRPA1 U2 small nuclear ribonucleoprotein A'                         | 1.18  |
| IPI00290952 | RRP1B Isoform 1 of Ribosomal RNA processing protein 1 homolog B      | 0.72  |
| IPI00658000 | IGF2BP3 Isoform 1 of Insulin-like growth factor 2 mRNA-binding pro   | 2     |
| IPI00029266 | SNRPE Small nuclear ribonucleoprotein E                              | 0.97  |
| IPI00220528 | SNRPF Small nuclear ribonucleoprotein F                              | 0.78  |
| IPI00305545 | DBR1 Isoform 1 of Lariat debranching enzyme                          | 0.82  |
| IPI00012340 | SRSF9 Serine/arginine-rich splicing factor 9                         | 1.01  |

|             |                                                                              |      |
|-------------|------------------------------------------------------------------------------|------|
| IPI00025039 | FBL rRNA 2'-O-methyltransferase fibrillarin                                  | 1.36 |
| IPI00181116 | IMP4 U3 small nucleolar ribonucleoprotein protein IMP4                       | 1.36 |
| IPI00017451 | SF3A1 Splicing factor 3A subunit 1                                           | 1.01 |
| IPI00029764 | SF3A3 Splicing factor 3A subunit 3                                           | 0.86 |
| IPI00940237 | DDX39A ATP-dependent RNA helicase DDX39A                                     | 1.29 |
| IPI00301936 | ELAVL1 cDNA FLJ60076, highly similar to ELAV-like protein 1                  | 1.05 |
| IPI00016610 | PCBP1 Poly(rC)-binding protein 1                                             | 1.62 |
| IPI00012066 | PCBP2 poly(rC)-binding protein 2 isoform b                                   | 1.79 |
| IPI00005634 | TTC37 Tetratricopeptide repeat protein 37                                    | 1.14 |
| IPI00015953 | DDX21 Isoform 1 of Nucleolar RNA helicase 2                                  | 0.84 |
| IPI00294229 | RCL1 RNA 3'-terminal phosphate cyclase-like protein                          | 1.03 |
| IPI00009137 | CPSF4 Isoform 1 of Cleavage and polyadenylation specificity factor subunit 4 | 0.63 |
| IPI00411937 | SNORD110;SNORD86;NOP56 Nucleolar protein 56                                  | 1.5  |
| IPI00220302 | WTAP Isoform 1 of Pre-mRNA-splicing regulator WTAP                           | 1.48 |
| IPI00290204 | SNRNP70 Isoform 1 of U1 small nuclear ribonucleoprotein 70 kDa               | 1.32 |
| IPI00303402 | PHAX Phosphorylated adapter RNA export protein                               | 1    |
| IPI00023126 | WDR46 WD repeat-containing protein 46                                        | 1.11 |
| IPI00027415 | DHX36 Isoform 1 of Probable ATP-dependent RNA helicase DHX36                 | 0.76 |
| IPI00215884 | SRSF1 Isoform ASF-1 of Serine/arginine-rich splicing factor 1                | 1.01 |
| IPI00400922 | PDCD11 Protein RRP5 homolog                                                  | 1.65 |
| IPI00013877 | HNRNPH3 Isoform 1 of Heterogeneous nuclear ribonucleoprotein H3              | 1.27 |
| IPI00879006 | RRP7A Ribosomal RNA-processing protein 7 homolog A                           | 0.96 |
| IPI00041325 | NHP2 H/ACA ribonucleoprotein complex subunit 2                               | 2.8  |
| IPI00300078 | PWP2 Periodic tryptophan protein 2 homolog                                   | 1.19 |
| IPI00009659 | RPRD1B Regulation of nuclear pre-mRNA domain-containing protein 1B           | 1.14 |
| IPI00003881 | HNRNPF Heterogeneous nuclear ribonucleoprotein F                             | 0.81 |
| IPI00550766 | RRP1 Ribosomal RNA processing protein 1 homolog A                            | 1.08 |
| IPI00016572 | SNRPG Small nuclear ribonucleoprotein G                                      | 0.8  |
| IPI00017964 | SNRPD3 Small nuclear ribonucleoprotein Sm D3                                 | 1.02 |
| IPI00003918 | RPL4 60S ribosomal protein L4                                                | 1.3  |
| IPI00642904 | PABPC4 polyadenylate-binding protein 4 isoform 1                             | 0.94 |
| IPI00017339 | SF3B4 Splicing factor 3B subunit 4                                           | 1.24 |
| IPI00023344 | SYMPK Isoform 1 of Symplekin                                                 | 0.94 |
| IPI00514277 | QKI Isoform 1 of Protein quaking                                             | 1.28 |
| IPI00026219 | CPSF1 Cleavage and polyadenylation specificity factor subunit 1              | 1.02 |
| IPI01021216 | PCBP2 Uncharacterized protein                                                | 7.18 |
| IPI00144293 | YTHDC1 Isoform 1 of YTH domain-containing protein 1                          |      |
| IPI00009471 | WDR3 WD repeat-containing protein 3                                          | 1.12 |
| IPI00304596 | NONO Non-POU domain-containing octamer-binding protein                       | 1.23 |
| IPI00478657 | GRSF1 G-rich sequence factor 1                                               | 1.68 |
| IPI00033153 | NXF1 Isoform 1 of Nuclear RNA export factor 1                                | 1.01 |
| IPI00074010 | QTRTD1 48 kDa protein                                                        | 3.86 |
| IPI00297450 | C12orf26 Uncharacterized protein C12orf26                                    | 0.19 |
| IPI00003377 | SRSF7 Isoform 1 of Serine/arginine-rich splicing factor 7                    | 0.82 |
| IPI00844193 | ZNF593 Zinc finger protein 593                                               | 1.76 |
| IPI00007818 | CPSF3 Cleavage and polyadenylation specificity factor subunit 3              | 1.25 |
| IPI00216746 | HNRNPK Isoform 2 of Heterogeneous nuclear ribonucleoprotein K                | 1.05 |
| IPI00412404 | SUPV3L1 ATP-dependent RNA helicase SUPV3L1, mitochondrial                    | 1.62 |
| IPI00032423 | DDX52 Probable ATP-dependent RNA helicase DDX52                              | 0.82 |
| IPI00006725 | DDX23 Probable ATP-dependent RNA helicase DDX23                              | 1.1  |
| IPI00032830 | REXO2 Isoform 1 of Oligoribonuclease, mitochondrial (Fragment)               | 0.85 |
| IPI00444452 | MOV10 Isoform 1 of Putative helicase MOV-10                                  | 1.08 |
| IPI00807545 | HNRNPK Isoform 3 of Heterogeneous nuclear ribonucleoprotein K                | 1.46 |
| IPI00295501 | CNOT8 CCR4-NOT transcription complex subunit 8                               | 1.02 |
| IPI00006723 | SNRNP40 cDNA FLJ56825, highly similar to WD repeat protein 57                | 1.28 |
| IPI00302850 | SNRPD1 Small nuclear ribonucleoprotein Sm D1                                 | 1.78 |
| IPI00005613 | U2AF1 Splicing factor U2AF 35 kDa subunit                                    | 0.84 |



|             |                                                                   |      |
|-------------|-------------------------------------------------------------------|------|
| IPI00003704 | RBM4;RBM14;RBM14-RBM4 Isoform 1 of RNA-binding protein 4          | 0.95 |
| IPI00163084 | XAB2 Pre-mRNA-splicing factor SYF1                                | 1.13 |
| IPI00012149 | MPHOSPH10 U3 small nucleolar ribonucleoprotein protein MPP10      | 2.01 |
| IPI00006932 | LUC7L2 cDNA FLJ55988, highly similar to RNA-binding protein Lu    | 0.8  |
| IPI00152695 | WDR82 WD repeat-containing protein 82                             | 0.98 |
| IPI00856037 | HNRNPR heterogeneous nuclear ribonucleoprotein R isoform 3        | 1.24 |
| IPI00026230 | HNRNPH2 Heterogeneous nuclear ribonucleoprotein H2                | 1.13 |
| IPI00221327 | RTCD1 Isoform 2 of RNA 3'-terminal phosphate cyclase              | 1.96 |
| IPI00002624 | PLRG1 Isoform 1 of Pleiotropic regulator 1                        | 0.94 |
| IPI00305068 | PRPF6 Pre-mRNA-processing factor 6                                | 0.98 |
| IPI00782992 | SRRM2 Isoform 1 of Serine/arginine repetitive matrix protein 2    | 2.45 |
| IPI00294955 | LSM4 U6 snRNA-associated Sm-like protein LSm4                     | 2.05 |
| IPI00008524 | PABPC1 Isoform 1 of Polyadenylate-binding protein 1               | 0.8  |
| IPI00420014 | SNRNP200 Isoform 1 of U5 small nuclear ribonucleoprotein 200 kDa  | 0.94 |
| IPI00043990 | DDX31 Isoform 1 of Probable ATP-dependent RNA helicase DDX31      | 0.98 |
| IPI00023972 | DDX47 Probable ATP-dependent RNA helicase DDX47                   | 1.11 |
| IPI00217862 | RRP9 U3 small nucleolar RNA-interacting protein 2                 | 1.19 |
| IPI00106491 | MRT04 mRNA turnover protein 4 homolog                             | 1.08 |
| IPI00021417 | SART1 U4/U6.U5 tri-snRNP-associated protein 1                     | 1.41 |
| IPI00018140 | SYNCRIP Isoform 1 of Heterogeneous nuclear ribonucleoprotein Q    | 0.83 |
| IPI00301323 | DDX18 ATP-dependent RNA helicase DDX18                            | 1.06 |
| IPI00304187 | RBM28 RNA-binding protein 28                                      | 0.83 |
| IPI00293331 | POP1 Ribonucleases P/MRP protein subunit POP1                     | 1.89 |
| IPI00291525 | TFB1M Dimethyladenosine transferase 1, mitochondrial              | 0.46 |
| IPI00187011 | ZC3H4 Zinc finger CCCH domain-containing protein 4                | 4.67 |
| IPI00013396 | SNRPC U1 small nuclear ribonucleoprotein C                        | 2.09 |
| IPI00219871 | NAA38 N-alpha-acetyltransferase 38, NatC auxiliary subunit        | 1.04 |
| IPI00377030 | SNRNP35 Isoform 2 of U11/U12 small nuclear ribonucleoprotein 35 k | 1.4  |
| IPI00012345 | SRSF6 Isoform SRP55-1 of Serine/arginine-rich splicing factor 6   | 0.73 |
| IPI00012074 | HNRNPR Isoform 1 of Heterogeneous nuclear ribonucleoprotein R     | 0.97 |
| IPI00293655 | DDX1 ATP-dependent RNA helicase DDX1                              | 1.14 |
| IPI00220493 | LSM5 Isoform 1 of U6 snRNA-associated Sm-like protein LSm5        | 2.88 |
| IPI00217686 | FTSJ3 Putative rRNA methyltransferase 3                           | 1.06 |
| IPI00006979 | LYRM4 LYR motif-containing protein 4                              | 1.11 |
| IPI00180154 | ATXN2 Isoform 1 of Ataxin-2                                       | 1.37 |
| IPI00006379 | NOP58 Nucleolar protein 58                                        | 1.05 |
| IPI00304932 | RRP8 Ribosomal RNA-processing protein 8                           | 2.06 |
| IPI00059292 | MAGOHB Protein mago nashi homolog 2                               | 0.87 |
| IPI00883857 | HNRNPU Isoform Long of Heterogeneous nuclear ribonucleoprotein U  | 0.9  |
| IPI00030288 | DHX35 Probable ATP-dependent RNA helicase DHX35                   | 2.38 |
| IPI00031554 | DDX50 ATP-dependent RNA helicase DDX50                            | 0.74 |
| IPI00953576 | IGF2BP2 Uncharacterized protein                                   | 1.26 |
| IPI00410657 | RNMT Isoform 2 of mRNA cap guanine-N7 methyltransferase           | 1.15 |
| IPI00641359 | RPP21 ribonuclease P protein subunit p21 isoform 1                | 1.81 |
| IPI00004436 | LSM1 U6 snRNA-associated Sm-like protein LSm1                     | 0.97 |

---

**KOG category [K] Transcription**

|             |                                                                   |      |
|-------------|-------------------------------------------------------------------|------|
| IPI00024802 | BTA1F1 TATA-binding protein-associated factor 172                 | 0.94 |
| IPI00300659 | CDC73 Parafibromin                                                | 0.87 |
| IPI00021692 | MBNL1 Isoform 1 of Muscleblind-like protein 1                     | 1.45 |
| IPI00328658 | ASH2L Isoform 1 of Set1/Ash2 histone methyltransferase complex su | 1.04 |
| IPI00306159 | MECR Isoform 1 of Trans-2-enoyl-CoA reductase, mitochondrial      | 1.35 |
| IPI01015167 | MED21 Uncharacterized protein                                     | 1.21 |
| IPI00871240 | SCAF8 cDNA FLJ56906, highly similar to RNA-binding protein 16     | 0.87 |
| IPI00409675 | MORF4L1 Isoform 1 of Mortality factor 4-like protein 1            | 2.89 |
| IPI00419473 | BTF3 Isoform 2 of Transcription factor BTF3                       | 0.63 |
| IPI00640088 | CSNK2B Uncharacterized protein                                    | 1.88 |
| IPI00016802 | SIRT1 NAD-dependent deacetylase sirtuin-1                         | 7.27 |

|             |                                                                   |      |
|-------------|-------------------------------------------------------------------|------|
| IPI00154451 | MMS19 cDNA FLJ55586, highly similar to MMS19-like protein         | 1.94 |
| IPI00155601 | MACROD1 MACRO domain-containing protein 1                         | 1.42 |
| IPI00021305 | CCNH Cyclin-H                                                     | 0.99 |
| IPI00853043 | SMARCD2 Isoform 1 of SWI/SNF-related matrix-associated actin-dep  | 0.81 |
| IPI00002993 | TAF9 Transcription initiation factor TFIID subunit 9              | 1.04 |
| IPI00100791 | GTF2H3 General transcription factor IIH subunit 3                 | 0.91 |
| IPI00251989 | POLR1E Isoform 1 of DNA-directed RNA polymerase I subunit RPA     | 0.76 |
| IPI00005223 | SMAD9 Isoform A of Mothers against decapentaplegic homolog 9      | 4.71 |
| IPI00181702 | SCAF4 Isoform 1 of Splicing factor, arginine/serine-rich 15       | 1.61 |
| IPI00009104 | RUVBL2 RuvB-like 2                                                | 0.94 |
| IPI00016613 | CSNK2A1 Uncharacterized protein                                   | 1.71 |
| IPI00607584 | MYBBP1A Isoform 2 of Myb-binding protein 1A                       | 1.21 |
| IPI00985353 | EEF1D Uncharacterized protein                                     | 0.88 |
| IPI00164672 | DCP1A mRNA-decapping enzyme 1A                                    | 1.3  |
| IPI00477686 | GTF2F2 General transcription factor IIF subunit 2                 | 1.17 |
| IPI00300341 | TCEB1 Transcription elongation factor B polypeptide 1             | 1.05 |
| IPI00302238 | AATF Protein AATF                                                 | 0.94 |
| IPI00003309 | POLR2H DNA-directed RNA polymerases I, II, and III subunit RPAB   | 0.82 |
| IPI00852816 | SMARCD1 Isoform 1 of SWI/SNF-related matrix-associated actin-dep  | 1.21 |
| IPI00645192 | MECP2 Mutant methyl CpG binding protein 2 variant 1               | 4.64 |
| IPI00815893 | CHD2 Isoform 1 of Chromodomain-helicase-DNA-binding protein 2     | 2.07 |
| IPI00017450 | GTF2F1 General transcription factor IIF subunit 1                 | 1.19 |
| IPI00477494 | DRAP1 Uncharacterized protein                                     | 1.08 |
| IPI00292168 | ASF1A Histone chaperone ASF1A                                     | 1.46 |
| IPI00003310 | POLR2J Uncharacterized protein                                    | 1.14 |
| IPI00434390 | ASCC1 cDNA FLJ55237, highly similar to Homo sapiens activating s  | 1.24 |
| IPI00004353 | GTF2A2 Transcription initiation factor IIA subunit 2              | 0.88 |
| IPI00247871 | TCERG1 Isoform 1 of Transcription elongation regulator 1          | 0.91 |
| IPI00641743 | HCFC1 Uncharacterized protein                                     | 1.11 |
| IPI00299413 | GABPA GA-binding protein alpha chain                              | 0.82 |
| IPI00024071 | HSF1 Isoform Long of Heat shock factor protein 1                  | 2.34 |
| IPI00908736 | YAF2 YY1-associated factor 2 isoform 1                            | 1.9  |
| IPI00101524 | SNF8 Isoform 1 of Vacuolar-sorting protein SNF8                   | 1.14 |
| IPI00300333 | PAF1 Isoform 1 of RNA polymerase II-associated factor 1 homolog   | 0.84 |
| IPI00303832 | RTF1 RNA polymerase-associated protein RTF1 homolog               | 1.14 |
| IPI00439194 | MBD3 Isoform 1 of Methyl-CpG-binding domain protein 3             | 0.67 |
| IPI01014355 | HELLS 103 kDa protein                                             | 0.32 |
| IPI00449049 | PARP1 Poly [ADP-ribose] polymerase 1                              | 1.06 |
| IPI00008531 | RCOR1 REST corepressor 1                                          | 1.71 |
| IPI00289667 | POLR3H Isoform 1 of DNA-directed RNA polymerase III subunit RP    | 1.15 |
| IPI00339381 | HLTF Isoform 1 of Helicase-like transcription factor              | 1.14 |
| IPI00298935 | KDM3B Isoform 1 of Lysine-specific demethylase 3B                 | 4.37 |
| IPI00012835 | CTBP1 C-terminal-binding protein 1                                | 1.04 |
| IPI00145260 | IBA57 Putative transferase CAF17, mitochondrial                   | 2.28 |
| IPI00010141 | POLE3 DNA polymerase epsilon subunit 3                            | 1.27 |
| IPI00183171 | SIRT3 cDNA FLJ60939, highly similar to NAD-dependent deacetyl     | 1.3  |
| IPI00008536 | YEATS4 YEATS domain-containing protein 4                          | 0.73 |
| IPI00018840 | TRIP4 Activating signal cointegrator 1                            | 0.91 |
| IPI00414482 | GTF3C1 Isoform 1 of General transcription factor 3C polypeptide 1 | 1.42 |
| IPI00879210 | GTF3C5 Isoform 3 of General transcription factor 3C polypeptide 5 | 1.28 |
| IPI00005154 | SSRP1 FACT complex subunit SSRP1                                  | 1.01 |
| IPI00005198 | ILF2 Interleukin enhancer-binding factor 2                        | 1.41 |
| IPI00216046 | SMARCA1 SWI/SNF related, matrix associated, actin dependent regu  | 0.84 |
| IPI00647008 | BRD7 Isoform 2 of Bromodomain-containing protein 7                | 1.39 |
| IPI00008439 | SS18L2 SS18-like protein 2                                        | 1.55 |
| IPI00221222 | SUB1 Activated RNA polymerase II transcriptional coactivator p15  | 1.38 |
| IPI00029728 | ERCC2 TFIIF basal transcription factor complex helicase XPD subun | 2.47 |

|             |                                                                       |      |
|-------------|-----------------------------------------------------------------------|------|
| IPI00002895 | SUPT4H1 Transcription elongation factor SPT4                          | 1.47 |
| IPI00174852 | MED20 Mediator of RNA polymerase II transcription subunit 20          | 0.84 |
| IPI00007957 | TAF6L TAF6-like RNA polymerase II p300/CBP-associated factor-as       | 1.14 |
| IPI00014174 | MORF4L2 Mortality factor 4-like protein 2                             | 1.33 |
| IPI00218568 | PCBD1 Pterin-4-alpha-carbinolamine dehydratase                        | 1.15 |
| IPI00030781 | STAT1 Isoform Alpha of Signal transducer and activator of transcript  | 3.05 |
| IPI00032911 | TBPL1 TATA box-binding protein-like protein 1                         | 0.95 |
| IPI00303439 | SMARCB1 cDNA FLJ13963 fis, clone Y79AA1001299, highly simil           | 1.26 |
| IPI00019981 | GTF2E2 Transcription initiation factor IIE subunit beta               | 0.87 |
| IPI00293735 | IKBKAP Elongator complex protein 1                                    | 0.92 |
| IPI00426640 | GTF2H2;GTF2H2C;GTF2H2D General transcription factor IIH subur         | 1.27 |
| IPI00607848 | BRMS1 breast cancer metastasis-suppressor 1 isoform 2                 | 1.11 |
| IPI00022208 | CEBPG CCAAT/enhancer-binding protein gamma                            | 1.01 |
| IPI00022820 | GTF2B Transcription initiation factor IIB                             | 1.5  |
| IPI00032439 | POLR1D Isoform 1 of DNA-directed RNA polymerases I and III subu       | 1.05 |
| IPI00944951 | TAF6 79 kDa protein                                                   | 1.09 |
| IPI00028122 | PSIP1 Isoform 1 of PC4 and SFRS1-interacting protein                  | 1.78 |
| IPI00007948 | POLR3C DNA-directed RNA polymerase III subunit RPC3                   | 0.73 |
| IPI00306723 | CEBPZ CCAAT/enhancer-binding protein zeta                             | 0.82 |
| IPI00844578 | DHX9 ATP-dependent RNA helicase A                                     | 1.01 |
| IPI00218895 | POLR2G DNA-directed RNA polymerase II subunit RPB7                    | 1.47 |
| IPI00000001 | STAU1 Isoform Long of Double-stranded RNA-binding protein Staufi      | 1.69 |
| IPI00031627 | POLR2A DNA-directed RNA polymerase II subunit RPB1                    | 1.64 |
| IPI00465233 | EIF3L Uncharacterized protein                                         | 0.85 |
| IPI00027808 | POLR2B DNA-directed RNA polymerase II subunit RPB2                    | 0.97 |
| IPI00874020 | PCBD2 Pterin-4-alpha-carbinolamine dehydratase 2                      | 0.9  |
| IPI00165477 | ELP3 Isoform 1 of Elongator complex protein 3                         | 2.33 |
| IPI00024620 | ENY2 Enhancer of yellow 2 transcription factor homolog                | 1.26 |
| IPI00031960 | POLR1A DNA-directed RNA polymerase I subunit RPA1                     | 0.83 |
| IPI00099497 | MAFF Transcription factor MafF                                        | 2.03 |
| IPI00019977 | GTF2E1 General transcription factor IIE subunit 1                     | 1.27 |
| IPI00013290 | HDGFRP2 Isoform 2 of Hepatoma-derived growth factor-related prote     | 2.68 |
| IPI00005179 | POLR1C Isoform 1 of DNA-directed RNA polymerases I and III subu       | 0.83 |
| IPI00015806 | GTF3C3 Isoform 1 of General transcription factor 3C polypeptide 3     | 0.88 |
| IPI00784414 | STAT3 Isoform 1 of Signal transducer and activator of transcription 3 | 1.39 |
| IPI00006113 | POLR2I DNA-directed RNA polymerase II subunit RPB9                    | 1.1  |
| IPI00926903 | CHCHD3 Uncharacterized protein                                        | 1.15 |
| IPI00010158 | CHRAC1 Chromatin accessibility complex protein 1                      | 1.4  |
| IPI00915022 | THOC2 Isoform 1 of THO complex subunit 2                              | 0.98 |
| IPI00007311 | MAFG Transcription factor MafG                                        | 0.97 |
| IPI00440727 | BRD4 Isoform 1 of Bromodomain-containing protein 4                    | 3.35 |
| IPI00967000 | CHCHD6 Uncharacterized protein                                        | 0.67 |
| IPI00220045 | POLR3E Isoform 1 of DNA-directed RNA polymerase III subunit RPC       | 0.66 |
| IPI00298058 | SUPT5H Isoform 1 of Transcription elongation factor SPT5              | 1.29 |
| IPI00289773 | CEBPB CCAAT/enhancer-binding protein beta                             | 1.63 |
| IPI00005648 | SAFB2 Scaffold attachment factor B2                                   | 1.47 |
| IPI00556494 | MED4 Mediator of RNA polymerase II transcription subunit 4            | 0.87 |
| IPI00922484 | cDNA, FLJ79376, highly similar to Protein G10 homolog                 | 1.2  |
| IPI00024163 | POLR3A Similar to DNA-directed RNA polymerase                         | 1.31 |
| IPI00002502 | ATF3 Isoform 1 of Cyclic AMP-dependent transcription factor ATF-3     | 0.53 |
| IPI00021570 | EDF1 Isoform 1 of Endothelial differentiation-related factor 1        | 1.52 |
| IPI00016746 | CBFB Isoform 1 of Core-binding factor subunit beta                    | 0.66 |
| IPI00163505 | RBM39 Isoform 1 of RNA-binding protein 39                             | 0.8  |
| IPI00418497 | TIMM50 Isoform 2 of Mitochondrial import inner membrane transloc      | 1.26 |
| IPI00329088 | CHD1L Isoform 1 of Chromodomain-helicase-DNA-binding protein 1        | 1.63 |
| IPI00020602 | CSNK2A2 Casein kinase II subunit alpha'                               | 1.26 |
| IPI00434623 | MBD2 Isoform 1 of Methyl-CpG-binding domain protein 2                 | 1.05 |

|                                                               |                                                                     |      |
|---------------------------------------------------------------|---------------------------------------------------------------------|------|
| IPI00001364                                                   | GCFC1 Isoform A of GC-rich sequence DNA-binding factor 1            | 1.15 |
| IPI00011590                                                   | FOSL1 Fos-related antigen 1                                         | 6.33 |
| IPI00011698                                                   | SAP18 histone deacetylase complex subunit SAP18                     | 0.96 |
| IPI00010136                                                   | CTBP2 Isoform 2 of C-terminal-binding protein 2                     | 0.93 |
| IPI00023556                                                   | SSU72 Isoform 1 of RNA polymerase II subunit A C-terminal domain    | 2.26 |
| IPI00514648                                                   | SMARCA2 Isoform Long of Probable global transcription activator Sl  | 1.56 |
| IPI00020956                                                   | HDGF Hepatoma-derived growth factor                                 | 1.83 |
| IPI00016839                                                   | GTF2H4 General transcription factor IIH subunit 4                   | 0.96 |
| IPI01009986                                                   | EEF1D Uncharacterized protein                                       | 2.07 |
| IPI00007063                                                   | HDGFRP3 Hepatoma-derived growth factor-related protein 3            | 2.72 |
| IPI00024698                                                   | PQBP1 Isoform 1 of Polyglutamine-binding protein 1                  | 4.11 |
| IPI00140420                                                   | SND1 Staphylococcal nuclease domain-containing protein 1            | 1.19 |
| IPI00002806                                                   | TAF12 Isoform TAFII20 of Transcription initiation factor TFIID subu | 0.8  |
| IPI00037599                                                   | TFCP2 Isoform 1 of Alpha-globin transcription factor CP2            | 1.18 |
| IPI00297211                                                   | SMARCA5 SWI/SNF-related matrix-associated actin-dependent regul     | 0.73 |
| IPI00021167                                                   | PRKRA Isoform 1 of Interferon-inducible double stranded RNA-depe    | 1.87 |
| IPI00556645                                                   | FOXK1 Isoform 1 of Forkhead box protein K1                          | 2.2  |
| IPI00333215                                                   | TCEA1 Isoform 1 of Transcription elongation factor A protein 1      | 1.37 |
| IPI00291093                                                   | POLR2E DNA-directed RNA polymerases I, II, and III subunit RPAB     | 1.89 |
| IPI01014546                                                   | PRMT1 protein arginine N-methyltransferase 1 isoform 1              | 0.86 |
| IPI00030481                                                   | MED10 Mediator of RNA polymerase II transcription subunit 10        | 1.09 |
| IPI00000685                                                   | CDK7 Cyclin-dependent kinase 7                                      | 2.16 |
| IPI00178440                                                   | SNORA41;EEF1B2 Elongation factor 1-beta                             | 1.2  |
| IPI01020979                                                   | TEAD3 TEA domain family member 3                                    | 0.78 |
| IPI00007283                                                   | POLR2D DNA-directed RNA polymerase II subunit RPB4                  | 1.45 |
| IPI00023322                                                   | DPF2 46 kDa protein                                                 | 1.17 |
| IPI00008991                                                   | DR1 Protein Dr1                                                     | 1.72 |
| IPI00024871                                                   | CBFB Isoform 2 of Core-binding factor subunit beta                  | 0.87 |
| IPI00031018                                                   | MAFK V-maf musculoaponeurotic fibrosarcoma oncogene homolog K       | 1.07 |
| IPI00412792                                                   | BTF3L4 Transcription factor BTF3 homolog 4                          | 1.7  |
| IPI00003311                                                   | POLR2L DNA-directed RNA polymerases I, II, and III subunit RPAB     | 0.91 |
| IPI00983392                                                   | SAFB scaffold attachment factor B1 isoform 1                        | 0.85 |
| IPI00170862                                                   | UXT protein UXT isoform 1                                           | 1.19 |
| <b>KOG category [L] Replication, recombination and repair</b> |                                                                     |      |
| IPI00025616                                                   | POLD2 DNA polymerase delta subunit 2                                | 2.37 |
| IPI00008223                                                   | RAD23B UV excision repair protein RAD23 homolog B                   | 1.48 |
| IPI00306667                                                   | CNP Isoform CNPII of 2',3'-cyclic-nucleotide 3'-phosphodiesterase   | 1.35 |
| IPI00290192                                                   | RNASEH2A Ribonuclease H2 subunit A                                  | 1.3  |
| IPI00013216                                                   | ORC2 Origin recognition complex subunit 2                           | 0.84 |
| IPI00299904                                                   | MCM7 Isoform 1 of DNA replication licensing factor MCM7             | 0.77 |
| IPI00029159                                                   | MRE11A cDNA FLJ38069 fis, clone CTONG2015434, highly similar        | 1.21 |
| IPI00290684                                                   | PNKP Bifunctional polynucleotide phosphatase/kinase                 | 1.11 |
| IPI00100151                                                   | XRN2 Isoform 1 of 5'-3' exoribonuclease 2                           | 1.59 |
| IPI00644712                                                   | XRCC6 X-ray repair cross-complementing protein 6                    | 1.04 |
| IPI00017381                                                   | RFC4 Replication factor C subunit 4                                 | 0.92 |
| IPI00001641                                                   | ORC6 Origin recognition complex subunit 6                           | 0.86 |
| IPI00384456                                                   | MSH6 Isoform GTBP-N of DNA mismatch repair protein Msh6             | 1.08 |
| IPI00021700                                                   | PCNA;PCNA-AS1 Proliferating cell nuclear antigen                    | 0.68 |
| IPI00154451                                                   | MMS19 cDNA FLJ55586, highly similar to MMS19-like protein           | 1.94 |
| IPI00219179                                                   | ERCC4 DNA repair endonuclease XPF                                   | 1.12 |
| IPI00021305                                                   | CCNH Cyclin-H                                                       | 0.99 |
| IPI00018349                                                   | MCM4 DNA replication licensing factor MCM4                          | 0.67 |
| IPI00793754                                                   | PRIM1 DNA primase                                                   | 0.55 |
| IPI00293464                                                   | DDB1 DNA damage-binding protein 1                                   | 1.18 |
| IPI00328825                                                   | N4BP2 Isoform 1 of NEDD4-binding protein 2                          | 1.14 |
| IPI00647246                                                   | ISG20 Isoform 1 of Interferon-stimulated gene 20 kDa protein        | 6.15 |
| IPI00100791                                                   | GTF2H3 General transcription factor IIH subunit 3                   | 0.91 |

|             |                                                                   |      |
|-------------|-------------------------------------------------------------------|------|
| IPI00027705 | PRIM2 Isoform 1 of DNA primase large subunit                      | 1.11 |
| IPI00556369 | SMG1 411 kDa protein                                              | 0.92 |
| IPI00017412 | RFC2 Isoform 1 of Replication factor C subunit 2                  | 0.99 |
| IPI00178203 | CHTF18 Uncharacterized protein                                    | 0.85 |
| IPI00655631 | POLD1 DNA polymerase                                              | 0.88 |
| IPI00294744 | PARN Poly(A)-specific ribonuclease PARN                           | 0.92 |
| IPI00029754 | MLH1 DNA mismatch repair protein Mlh1                             | 0.69 |
| IPI00796835 | AQR Intron-binding protein aquarius                               | 0.89 |
| IPI00017303 | MSH2 DNA mismatch repair protein Msh2                             | 0.97 |
| IPI00549516 | TOE1 Target of EGR1 protein 1                                     | 0.75 |
| IPI00290314 | WRNIP1 Isoform 1 of ATPase WRNIP1                                 | 0.99 |
| IPI00032387 | GIN51 DNA replication complex GINS protein PSF1                   | 0.58 |
| IPI00031614 | GIN54 Isoform 1 of DNA replication complex GINS protein SLD5      | 0.51 |
| IPI00069084 | TRRAP Isoform 1 of Transformation/transcription domain-associated | 1.45 |
| IPI00816217 | SMC6 Isoform 2 of Structural maintenance of chromosomes protein 6 | 0.95 |
| IPI00026215 | FEN1 Flap endonuclease 1                                          | 1.53 |
| IPI00027035 | GPN1 GPN-loop GTPase 1 isoform a                                  | 0.6  |
| IPI00004859 | BLM Bloom syndrome protein                                        | 1.61 |
| IPI00647655 | POLA1 DNA polymerase                                              | 0.57 |
| IPI00298306 | ATM Serine-protein kinase ATM                                     | 1.15 |
| IPI00375358 | RFC1 Isoform 1 of Replication factor C subunit 1                  | 0.87 |
| IPI00018350 | MCM5 DNA replication licensing factor MCM5                        | 0.94 |
| IPI00401902 | ERCC1 DNA excision repair protein ERCC-1 isoform 1                | 1.33 |
| IPI00168899 | DBF4B Isoform 1 of Protein DBF4 homolog B                         | 18.7 |
| IPI00219538 | POLB DNA polymerase beta                                          | 0.66 |
| IPI00220834 | XRCC5 X-ray repair cross-complementing protein 5                  | 1.12 |
| IPI00296337 | PRKDC Isoform 1 of DNA-dependent protein kinase catalytic subunit | 1.3  |
| IPI00031410 | MTOR Serine/threonine-protein kinase mTOR                         | 2    |
| IPI00031521 | RFC3 Replication factor C subunit 3                               | 0.86 |
| IPI00031514 | RFC5 Replication factor C subunit 5                               | 1    |
| IPI00549205 | RAD50 Isoform 2 of DNA repair protein RAD50                       | 1    |
| IPI00020127 | RPA1 Replication protein A 70 kDa DNA-binding subunit             | 1.01 |
| IPI00449049 | PARP1 Poly [ADP-ribose] polymerase 1                              | 1.06 |
| IPI00015143 | ORC5 Origin recognition complex subunit 5                         | 0.72 |
| IPI00339381 | HLTF Isoform 1 of Helicase-like transcription factor              | 1.14 |
| IPI00742743 | TP53BP1 Isoform 2 of Tumor suppressor p53-binding protein 1       | 2.46 |
| IPI00016839 | GTF2H4 General transcription factor IIH subunit 4                 | 0.96 |
| IPI00374747 | ORC3 Isoform 2 of Origin recognition complex subunit 3            | 1.02 |
| IPI00013214 | MCM3 cDNA FLJ55599, highly similar to DNA replication licensing   | 0.76 |
| IPI00021187 | RUVBL1 Isoform 1 of RuvB-like 1                                   | 1.18 |
| IPI00012463 | TATDN1 Isoform 1 of Putative deoxyribonuclease TATDN1             | 0.97 |
| IPI00005154 | SSRP1 FACT complex subunit SSRP1                                  | 1.01 |
| IPI00026087 | BANF1 Barrier-to-autointegration factor                           | 0.87 |
| IPI00003647 | RAD1 Isoform 1 of Cell cycle checkpoint protein RAD1              | 1.12 |
| IPI00646762 | NUDT5 Uncharacterized protein                                     | 1.64 |
| IPI00000685 | CDK7 Cyclin-dependent kinase 7                                    | 2.16 |
| IPI00413611 | TOP1 DNA topoisomerase 1                                          | 0.87 |
| IPI00008219 | RAD23A UV excision repair protein RAD23 homolog A                 | 2.02 |
| IPI00029728 | ERCC2 TFIIH basal transcription factor complex helicase XPD subun | 2.47 |
| IPI00215911 | APEX1 DNA-(apurinic or apyrimidinic site) lyase                   | 1.76 |
| IPI00184330 | MCM2 DNA replication licensing factor MCM2                        | 0.67 |
| IPI00436632 | NIPBL Isoform 1 of Nipped-B-like protein                          | 0.74 |
| IPI00329605 | MSH3 DNA mismatch repair protein Msh3                             | 1.01 |
| IPI00031517 | MCM6 DNA replication licensing factor MCM6                        | 0.73 |
| IPI00426640 | GTF2H2;GTF2H2C;GTF2H2D General transcription factor IIH subur     | 1.27 |

---

**KOG category [B] Chromatin structure and dynamics**

|             |                                                                   |     |
|-------------|-------------------------------------------------------------------|-----|
| IPI00411559 | SMC4 Isoform 1 of Structural maintenance of chromosomes protein 4 | 0.6 |
|-------------|-------------------------------------------------------------------|-----|

|             |                                                                                       |      |
|-------------|---------------------------------------------------------------------------------------|------|
| IPI00642238 | HP1BP3 Isoform 1 of Heterochromatin protein 1-binding protein 3                       | 1.67 |
| IPI00005711 | HDAC6 cDNA FLJ56474, highly similar to Histone deacetylase 6                          | 1.63 |
| IPI00419833 | HIST1H2BK Histone H2B type 1-K                                                        | 1.07 |
| IPI00018278 | H2AFV Histone H2A.V                                                                   | 1.4  |
| IPI00027280 | TOP2B Isoform Beta-2 of DNA topoisomerase 2-beta                                      | 0.87 |
| IPI00299507 | NCAPH Condensin complex subunit 2                                                     | 0.63 |
| IPI00328658 | ASH2L Isoform 1 of Set1/Ash2 histone methyltransferase complex subunit 1              | 1.04 |
| IPI00216457 | HIST2H2AA4;HIST2H2AA3 Histone H2A type 2-A                                            | 0.82 |
| IPI00021924 | H1FX Histone H1x                                                                      | 1.66 |
| IPI00217465 | HIST1H1C Histone H1.2                                                                 | 9.71 |
| IPI00409675 | MORF4L1 Isoform 1 of Mortality factor 4-like protein 1                                | 2.89 |
| IPI00020021 | DEK Protein DEK                                                                       | 1.08 |
| IPI00023860 | NAP1L1 Nucleosome assembly protein 1-like 1                                           | 1.04 |
| IPI00007927 | SMC2 Isoform 1 of Structural maintenance of chromosomes protein 2                     | 0.68 |
| IPI00003935 | HIST2H2BE Histone H2B type 2-E                                                        | 0.93 |
| IPI00016802 | SIRT1 NAD-dependent deacetylase sirtuin-1                                             | 7.27 |
| IPI00643722 | ARID1A Isoform 1 of AT-rich interactive domain-containing protein 1                   | 1.19 |
| IPI00299524 | NCAPD2 Condensin complex subunit 1                                                    | 0.73 |
| IPI00008422 | SMARCAD1 Isoform 2 of SWI/SNF-related matrix-associated actin-depolymerizing factor 1 | 0.77 |
| IPI00006900 | UTP3 Something about silencing protein 10                                             | 0.89 |
| IPI00155601 | MACROD1 MACRO domain-containing protein 1                                             | 1.42 |
| IPI00853043 | SMARCD2 Isoform 1 of SWI/SNF-related matrix-associated actin-depolymerizing factor 2  | 0.81 |
| IPI00386189 | NAA15 Isoform 1 of N-alpha-acetyltransferase 15, NatA auxiliary subunit 1             | 1.24 |
| IPI00165477 | ELP3 Isoform 1 of Elongator complex protein 3                                         | 2.33 |
| IPI00550239 | H1F0 Histone H1.0                                                                     | 1.59 |
| IPI00453473 | HIST2H4B;HIST1H4C;HIST1H4J;HIST1H4D;HIST1H4A;HIST2H4A;HIST1H4E                        | 0.88 |
| IPI00013774 | HDAC1 Histone deacetylase 1                                                           | 1.12 |
| IPI00646512 | RBBP7 histone-binding protein RBBP7 isoform 1                                         | 0.92 |
| IPI00024662 | CBX5;MIR3198-1 Chromobox protein homolog 5                                            | 0.95 |
| IPI00184884 | NSMCE1 Non-structural maintenance of chromosomes element 1 homolog 1                  | 1.54 |
| IPI00216730 | HIST2H2AB Histone H2A type 2-B                                                        | 0.86 |
| IPI00026272 | HIST1H2AE;HIST1H2AB;HIST1H2AD;HIST1H2AG;HIST1H2AK;HIST1H2AL                           | 1.44 |
| IPI00069084 | TRRAP Isoform 1 of Transformation/transcription domain-associated protein 1           | 1.45 |
| IPI00852816 | SMARCD1 Isoform 1 of SWI/SNF-related matrix-associated actin-depolymerizing factor 1  | 1.21 |
| IPI00645192 | MECP2 Mutant methyl CpG binding protein 2 variant 1                                   | 4.64 |
| IPI00012773 | MTA1 Isoform Long of Metastasis-associated protein MTA1                               | 1.76 |
| IPI00298306 | ATM Serine-protein kinase ATM                                                         | 1.15 |
| IPI00219037 | H2AFX Histone H2A.x                                                                   | 2.49 |
| IPI00332499 | NASP Isoform 3 of Nuclear autoantigenic sperm protein                                 | 1.07 |
| IPI00292168 | ASF1A Histone chaperone ASF1A                                                         | 1.46 |
| IPI00171798 | MTA2 Metastasis-associated protein MTA2                                               | 1.22 |
| IPI00017669 | SMARCE1 Isoform 1 of SWI/SNF-related matrix-associated actin-depolymerizing factor 1  | 1.09 |
| IPI00217468 | HIST1H1B Histone H1.5                                                                 | 1.18 |
| IPI00010088 | HDAC4 Histone deacetylase 4                                                           | 0.9  |
| IPI00024719 | HAT1 Isoform A of Histone acetyltransferase type B catalytic subunit                  | 0.95 |
| IPI00023177 | CHAF1A Isoform 1 of Chromatin assembly factor 1 subunit A                             | 1.53 |
| IPI00439194 | MBD3 Isoform 1 of Methyl-CpG-binding domain protein 3                                 | 0.67 |
| IPI00434623 | MBD2 Isoform 1 of Methyl-CpG-binding domain protein 2                                 | 1.05 |
| IPI00152695 | WDR82 WD repeat-containing protein 82                                                 | 0.98 |
| IPI00944455 | NCAPD2 NCAPD2 protein (Fragment)                                                      | 1.34 |
| IPI00013789 | SMYD5 SET and MYND domain-containing protein 5                                        | 0.99 |
| IPI00217466 | HIST1H1D Histone H1.3                                                                 | 9.26 |
| IPI00514648 | SMARCA2 Isoform Long of Probable global transcription activator SMARCA2               | 1.56 |
| IPI00234252 | SMARCC1 SWI/SNF complex subunit SMARCC1                                               | 1.13 |
| IPI00183171 | SIRT3 cDNA FLJ60939, highly similar to NAD-dependent deacetylase 3                    | 1.3  |
| IPI01021606 | SMARCC2 Uncharacterized protein                                                       | 1.15 |
| IPI00069817 | BAZ1B Isoform 1 of Tyrosine-protein kinase BAZ1B                                      | 1.2  |

|             |                                                                  |      |
|-------------|------------------------------------------------------------------|------|
| IPI00878669 | CBX1 Uncharacterized protein                                     | 1.06 |
| IPI00005154 | SSRP1 FACT complex subunit SSRP1                                 | 1.01 |
| IPI00328319 | RBBP4 Isoform 1 of Histone-binding protein RBBP4                 | 0.92 |
| IPI00026087 | BANF1 Barrier-to-autointegration factor                          | 0.87 |
| IPI00297579 | CBX3 Chromobox protein homolog 3                                 | 1.28 |
| IPI00217467 | HIST1H1E Histone H1.4                                            | 0.81 |
| IPI00909569 | HDAC7 Isoform 8 of Histone deacetylase 7                         | 9.65 |
| IPI00165357 | MTA3 Isoform 1 of Metastasis-associated protein MTA3             | 1.14 |
| IPI00930174 | HIST2H2BF histone H2B type 2-F isoform b                         | 1.06 |
| IPI00640917 | TBL1X Isoform 1 of F-box-like/WD repeat-containing protein TBL1X | 1.07 |
| IPI00017763 | NAP1L4 Uncharacterized protein                                   | 1.49 |
| IPI00106495 | NCAPG Condensin complex subunit 3                                | 0.6  |
| IPI00170596 | SIN3A Paired amphipathic helix protein Sin3a                     | 1.2  |
| IPI00013830 | SNW1 SNW domain-containing protein 1                             | 1.69 |
| IPI00014174 | MORF4L2 Mortality factor 4-like protein 2                        | 1.33 |
| IPI00455457 | Uncharacterized protein                                          | 0.93 |
| IPI00436632 | NIPBL Isoform 1 of Nipped-B-like protein                         | 0.74 |
| IPI00171611 | HIST2H3D;HIST2H3A;HIST2H3C Histone H3.2                          | 0.89 |
| IPI00303439 | SMARCB1 cDNA FLJ13963 fis, clone Y79AA1001299, highly similar    | 1.26 |
| IPI00289601 | HDAC2 Histone deacetylase 2                                      | 0.96 |

---

## CELLULAR PROCESSES AND SIGNALING

---

### **KOG category [D] Cell cycle control, cell division, chromosome partitioning**

---

|             |                                                                       |      |
|-------------|-----------------------------------------------------------------------|------|
| IPI00014312 | CUL3 Isoform 1 of Cullin-3                                            | 1.08 |
| IPI00397904 | NUP93 Nuclear pore complex protein Nup93                              | 0.94 |
| IPI00018240 | SDAD1 Isoform 1 of Protein SDA1 homolog                               | 0.85 |
| IPI00023876 | CASP6 Isoform Alpha of Caspase-6                                      | 0.75 |
| IPI00411559 | SMC4 Isoform 1 of Structural maintenance of chromosomes protein 4     | 0.6  |
| IPI00295940 | SUN2 cDNA FLJ55508, highly similar to Sad1/unc-84-like protein 2      | 0.51 |
| IPI00303890 | XIAP Baculoviral IAP repeat-containing protein 4                      | 1.02 |
| IPI00152658 | NEK7 Isoform 1 of Serine/threonine-protein kinase Nek7                | 1.49 |
| IPI00299507 | NCAPH Condensin complex subunit 2                                     | 0.63 |
| IPI00023860 | NAP1L1 Nucleosome assembly protein 1-like 1                           | 1.04 |
| IPI00005791 | NDC80 Kinetochore protein NDC80 homolog                               | 0.74 |
| IPI00007927 | SMC2 Isoform 1 of Structural maintenance of chromosomes protein 2     | 0.68 |
| IPI00007253 | TRAPPC8 Isoform 1 of Trafficking protein particle complex subunit 8   | 2.63 |
| IPI00640088 | CSNK2B Uncharacterized protein                                        | 1.88 |
| IPI00893197 | PPP2R4 Protein phosphatase 2A, regulatory subunit B' isoform b        | 1.34 |
| IPI00299524 | NCAPD2 Condensin complex subunit 1                                    | 0.73 |
| IPI00871851 | SEPT2 Isoform 2 of Septin-2                                           | 1.52 |
| IPI00745793 | CCNB1 G2/mitotic-specific cyclin-B1                                   | 0.49 |
| IPI00021305 | CCNH Cyclin-H                                                         | 0.99 |
| IPI00305887 | NUF2 Kinetochore protein Nuf2                                         | 0.54 |
| IPI00719725 | PPP6R3 Isoform 5 of Serine/threonine-protein phosphatase 6 regulatory | 0.63 |
| IPI00021175 | CDK12 Isoform 1 of Cyclin-dependent kinase 12                         | 4.5  |
| IPI00216675 | CASP7 Isoform Alpha' of Caspase-7                                     | 2.19 |
| IPI00017596 | MAPRE1 Microtubule-associated protein RP/EB family member 1           | 1.05 |
| IPI00215928 | CETN2 Centrin-2                                                       | 0.97 |
| IPI00240812 | PDS5B Uncharacterized protein                                         | 1.94 |
| IPI00178203 | CHTF18 Uncharacterized protein                                        | 0.85 |
| IPI00216674 | CASP7 Isoform Beta of Caspase-7                                       | 0.73 |
| IPI00016613 | CSNK2A1 Uncharacterized protein                                       | 1.71 |
| IPI00014456 | STRN Isoform 1 of Striatin                                            | 1.57 |
| IPI00009943 | TPT1 Tumor protein, translationally-controlled 1                      | 1.07 |
| IPI00014310 | CUL1 Cullin-1                                                         | 0.86 |
| IPI00946813 | TUT1 speckle targeted PIP5K1A-regulated poly(A) polymerase            | 5.23 |

|             |                                                                     |      |
|-------------|---------------------------------------------------------------------|------|
| IPI00069084 | TRRAP Isoform 1 of Transformation/transcription domain-associated   | 1.45 |
| IPI00016074 | MPHOSPH6 M-phase phosphoprotein 6                                   | 0.59 |
| IPI01024808 | 26 kDa protein                                                      | 2.1  |
| IPI00414872 | PPP6R2 Isoform 1 of Serine/threonine-protein phosphatase 6 regulato | 0.94 |
| IPI00015105 | CKS2 Cyclin-dependent kinases regulatory subunit 2                  | 0.34 |
| IPI00021277 | NUBP1 Isoform 1 of Cytosolic Fe-S cluster assembly factor NUBP1     | 2.32 |
| IPI00941534 | SEPT7 Isoform 1 of Septin-7                                         | 2.08 |
| IPI00298306 | ATM Serine-protein kinase ATM                                       | 1.15 |
| IPI00020008 | NEDD8 NEDD8                                                         | 0.99 |
| IPI00216952 | LMNA Isoform C of Prelamin-A/C                                      | 1.17 |
| IPI00005822 | CDC23 Isoform 1 of Cell division cycle protein 23 homolog           | 1.63 |
| IPI00332499 | NASP Isoform 3 of Nuclear autoantigenic sperm protein               | 1.07 |
| IPI00177437 | CRNKL1 Isoform 1 of Crooked neck-like protein 1                     | 0.79 |
| IPI00168899 | DBF4B Isoform 1 of Protein DBF4 homolog B                           | 18.7 |
| IPI00006715 | RAD21 Double-strand-break repair protein rad21 homolog              | 0.96 |
| IPI00030247 | CCNT1 Cyclin-T1                                                     | 1.31 |
| IPI00940737 | SUN3 Isoform 2 of SUN domain-containing protein 3                   | 4    |
| IPI00004308 | FTSJ1 Isoform 1 of Putative ribosomal RNA methyltransferase 1       | 0.65 |
| IPI00031521 | RFC3 Replication factor C subunit 3                                 | 0.86 |
| IPI00940535 | MAD1L1 Mitotic spindle assembly checkpoint protein MAD1             | 0.88 |
| IPI00641743 | HCFC1 Uncharacterized protein                                       | 1.11 |
| IPI00978953 | TPT1 Uncharacterized protein                                        |      |
| IPI00007088 | ANAPC10 Anaphase-promoting complex subunit 10                       | 3.53 |
| IPI00009407 | DAD1 Dolichyl-diphosphooligosaccharide--protein glycosyltransferas  | 1.28 |
| IPI00017597 | MAPRE3 Isoform 1 of Microtubule-associated protein RP/EB family r   | 0.67 |
| IPI00644674 | NUBP2 Cytosolic Fe-S cluster assembly factor NUBP2                  | 1.76 |
| IPI00470883 | STAG2 Isoform 2 of Cohesin subunit SA-2                             | 0.73 |
| IPI00008248 | ANAPC7 Isoform 1 of Anaphase-promoting complex subunit 7            | 0.68 |
| IPI00910694 | NSUN5 putative methyltransferase NSUN5 isoform 3                    | 0.87 |
| IPI00020602 | CSNK2A2 Casein kinase II subunit alpha'                             | 1.26 |
| IPI00008247 | ANAPC5 Isoform 1 of Anaphase-promoting complex subunit 5            | 0.71 |
| IPI00021405 | LMNA Isoform A of Prelamin-A/C                                      | 1.19 |
| IPI00944455 | NCAPD2 NCAPD2 protein (Fragment)                                    | 1.34 |
| IPI00015104 | CKS1B Cyclin-dependent kinases regulatory subunit 1                 | 0.62 |
| IPI00384187 | SEPT3 Isoform 1 of Neuronal-specific septin-3                       | 1.81 |
| IPI00465294 | CDC5L Cell division cycle 5-like protein                            | 1.71 |
| IPI00798193 | SNX24 Uncharacterized protein                                       | 1.09 |
| IPI00292140 | CASP3 Caspase-3                                                     | 0.64 |
| IPI00301518 | MOBK1B Isoform 1 of Mps one binder kinase activator-like 1B         | 1.7  |
| IPI00294618 | PRCC Proline-rich protein PRCC                                      | 1.19 |
| IPI00100313 | PCID2 Isoform 4 of PCI domain-containing protein 2                  | 1.51 |
| IPI00419273 | CUL4A Isoform 1 of Cullin-4A                                        | 0.89 |
| IPI00290928 | GNA13 Guanine nucleotide-binding protein subunit alpha-13           | 1.68 |
| IPI00966303 | ANAPC4 Uncharacterized protein                                      | 0.53 |
| IPI00156032 | KRR1 KRR1 small subunit processome component homolog                | 1.65 |
| IPI00028412 | SSSCA1 Sjogren syndrome/scleroderma autoantigen 1                   | 1.11 |
| IPI00046828 | CCDC58 Coiled-coil domain-containing protein 58                     | 1.26 |
| IPI00217975 | LMNB1 Lamin-B1                                                      | 0.78 |
| IPI00748145 | GNAI2 Isoform 1 of Guanine nucleotide-binding protein G(i) subunit  | 1.41 |
| IPI00023640 | PDCD5 Programmed cell death protein 5                               | 0.86 |
| IPI00219420 | SMC3 Structural maintenance of chromosomes protein 3                | 0.74 |
| IPI00003647 | RAD1 Isoform 1 of Cell cycle checkpoint protein RAD1                | 1.12 |
| IPI00967716 | SEPT11 Uncharacterized protein                                      | 1.2  |
| IPI00012369 | MAD2L1 Mitotic spindle assembly checkpoint protein MAD2A            | 0.84 |
| IPI00012970 | PPP6C Isoform 1 of Serine/threonine-protein phosphatase 6 catalytic | 0.93 |
| IPI00291939 | SMC1A Structural maintenance of chromosomes protein 1A              | 0.88 |
| IPI00015838 | LYAR Cell growth-regulating nucleolar protein                       | 0.75 |



|                                            |                                                                    |      |
|--------------------------------------------|--------------------------------------------------------------------|------|
| IPI00013468                                | BUB3 Isoform 1 of Mitotic checkpoint protein BUB3                  | 1.39 |
| IPI00441473                                | PRMT5 Protein arginine N-methyltransferase 5                       | 1.56 |
| IPI00398700                                | GNAO1 Isoform Alpha-2 of Guanine nucleotide-binding protein G(o)   | 2.91 |
| IPI00000685                                | CDK7 Cyclin-dependent kinase 7                                     | 2.16 |
| IPI00017763                                | NAP1L4 Uncharacterized protein                                     | 1.49 |
| IPI00220578                                | GNAI3 Guanine nucleotide-binding protein G(k) subunit alpha        | 0.91 |
| IPI00033907                                | ANAPC1 Anaphase-promoting complex subunit 1                        | 1.09 |
| IPI00436705                                | MORC3 Uncharacterized protein                                      | 0.63 |
| IPI00106495                                | NCAPG Condensin complex subunit 3                                  | 0.6  |
| IPI00218095                                | BIRC5 Isoform 2 of Baculoviral IAP repeat-containing protein 5     | 6.4  |
| IPI00013122                                | CDC37 Hsp90 co-chaperone Cdc37                                     | 2.84 |
| IPI00746256                                | KATNB1 Katanin p80 WD40-containing subunit B1                      | 2.3  |
| IPI00337415                                | GNAI1 Guanine nucleotide-binding protein G(i) subunit alpha-1      | 1.55 |
| IPI00436632                                | NIPBL Isoform 1 of Nipped-B-like protein                           | 0.74 |
| IPI00643342                                | PEA15 cDNA FLJ38560 fis, clone HCHON2003642, highly similar to     | 1.75 |
| IPI00220726                                | CASP8 Isoform 9 of Caspase-8                                       | 0.95 |
| IPI00607848                                | BRMS1 breast cancer metastasis-suppressor 1 isoform 2              | 1.11 |
| <b>KOG category [Y] Nuclear structure</b>  |                                                                    |      |
| IPI00293533                                | NUP62 Nuclear pore glycoprotein p62                                | 0.9  |
| IPI00022744                                | CSE1L Isoform 1 of Exportin-2                                      | 1.01 |
| IPI00398009                                | IPO4 Isoform 2 of Importin-4                                       | 1.19 |
| IPI00640703                                | XPO5 Exportin-5                                                    | 1.04 |
| IPI00397571                                | NSFL1C Isoform 3 of NSFL1 cofactor p47                             | 0.88 |
| IPI00028005                                | NUP107 Nuclear pore complex protein Nup107                         | 1.03 |
| IPI00855940                                | XPO7 Uncharacterized protein                                       | 1.2  |
| IPI00910194                                | NUP153 cDNA FLJ60565, highly similar to Nuclear pore complex pr    | 1.17 |
| IPI00001639                                | KPNB1 Importin subunit beta-1                                      | 1.01 |
| IPI00305374                                | THOC1 Isoform 1 of THO complex subunit 1                           | 1.02 |
| IPI00306290                                | XPOT Exportin-T                                                    | 2.06 |
| IPI00007401                                | IPO8 Importin-8                                                    | 0.87 |
| IPI01019011                                | NUP54 Nucleoporin 54kDa variant (Fragment)                         | 1.04 |
| IPI00021405                                | LMNA Isoform A of Prelamin-A/C                                     | 1.19 |
| IPI00006038                                | NUP98 Isoform 1 of Nuclear pore complex protein Nup98-Nup96        | 0.94 |
| IPI00005651                                | IPO13 Importin-13                                                  | 1.88 |
| IPI00790530                                | NUP85 Nuclear pore complex protein Nup85                           | 1.13 |
| IPI00291200                                | NUP133 Nuclear pore complex protein Nup133                         | 1.08 |
| IPI00007402                                | IPO7 Importin-7                                                    | 0.81 |
| IPI00185146                                | IPO9 Importin-9                                                    | 1.02 |
| IPI00217975                                | LMNB1 Lamin-B1                                                     | 0.78 |
| IPI00288941                                | NCOA5 Nuclear receptor coactivator 5                               | 1.37 |
| IPI00913938                                | IPO11 Isoform 2 of Importin-11                                     | 1.85 |
| IPI00748807                                | NUP160 Isoform 1 of Nuclear pore complex protein Nup160            | 1.34 |
| IPI00298961                                | XPO1 Exportin-1                                                    | 1.1  |
| IPI00646361                                | NUP214 Isoform 5 of Nuclear pore complex protein Nup214            | 1.81 |
| IPI00220609                                | SEH1L Isoform B of Nucleoporin SEH1                                | 1.26 |
| IPI00026625                                | NUP155 Isoform 1 of Nuclear pore complex protein Nup155            | 1.03 |
| IPI00294879                                | RANGAP1 Ran GTPase-activating protein 1                            | 0.81 |
| IPI00001738                                | NUP88 Nuclear pore complex protein Nup88                           | 2.14 |
| IPI00939304                                | IPO5 Isoform 3 of Importin-5                                       | 0.94 |
| IPI00001676                                | NPLOC4 Isoform 2 of Nuclear protein localization protein 4 homolog | 0.84 |
| IPI00216952                                | LMNA Isoform C of Prelamin-A/C                                     | 1.17 |
| IPI00024364                                | TNPO1 Isoform 1 of Transportin-1                                   | 0.94 |
| <b>KOG category [V] Defense mechanisms</b> |                                                                    |      |
| IPI00032134                                | SERPINB8 Serpin B8                                                 | 1.16 |
| IPI00216293                                | TST Thiosulfate sulfurtransferase                                  | 1.12 |
| IPI00032139                                | SERPINB9 Serpin B9                                                 | 1.36 |
| IPI00924788                                | NCEH1 neutral cholesterol ester hydrolase 1 isoform a              | 2.43 |

|             |                                                                      |      |
|-------------|----------------------------------------------------------------------|------|
| IPI00030362 | PLP2 Isoform 1 of Proteolipid protein 2                              | 2.91 |
| IPI00647400 | RNPEP Uncharacterized protein                                        | 2.07 |
| IPI00009210 | DUSP12 Dual specificity protein phosphatase 12                       | 1.78 |
| IPI00221233 | BCAP29 B-cell receptor-associated protein 29                         | 1.55 |
| IPI00007118 | SERPINE1 Plasminogen activator inhibitor 1                           | 4.98 |
| IPI00552587 | GADD45GIP1 Growth arrest and DNA damage-inducible proteins-int       | 1.3  |
| IPI00004970 | UTP20 Small subunit processome component 20 homolog                  | 1.09 |
| IPI00014808 | PAFAH1B3 Platelet-activating factor acetylhydrolase IB subunit gamma | 1.52 |
| IPI00009294 | CRIM1 Cysteine-rich motor neuron 1 protein                           |      |
| IPI00018671 | DUSP3 Dual specificity protein phosphatase 3                         | 1.59 |
| IPI00005724 | LANCL1 LanC-like protein 1                                           | 2.16 |
| IPI00026848 | LRPAP1 Alpha-2-macroglobulin receptor-associated protein             | 1.14 |
| IPI00005707 | MRC2 C-type mannose receptor 2                                       | 4.05 |
| IPI00465059 | RHOT2 Isoform 1 of Mitochondrial Rho GTPase 2                        | 0.79 |
| IPI00217536 | RHOT1 Isoform 3 of Mitochondrial Rho GTPase 1                        | 1.14 |
| IPI00006713 | DNAJC3 DnaJ homolog subfamily C member 3                             | 0.91 |
| IPI00298547 | PARK7 Protein DJ-1                                                   | 1.4  |
| IPI00032140 | SERPINH1 Serpin H1                                                   | 1.51 |
| IPI00028412 | SSSCA1 Sjogren syndrome/scleroderma autoantigen 1                    | 1.11 |
| IPI00910977 | MPST 3-mercaptopyruvate sulfurtransferase isoform 1                  | 1.35 |
| IPI00102685 | MYADM Myeloid-associated differentiation marker                      | 8.09 |
| IPI00026546 | PAFAH1B2 Platelet-activating factor acetylhydrolase IB subunit beta  | 1.95 |
| IPI00413451 | SERPINB6 Serpin B6                                                   | 1.28 |
| IPI00642211 | RNPEP Aminopeptidase B                                               | 1.89 |
| IPI00306353 | DUSP23 Dual specificity protein phosphatase 23                       | 2.47 |
| IPI00219077 | LTA4H Isoform 1 of Leukotriene A-4 hydrolase                         | 1.39 |
| IPI00295209 | SNX5 Sorting nexin-5                                                 | 0.98 |
| IPI00424460 | ZFYVE16 Isoform 1 of Zinc finger FYVE domain-containing protein 16   | 1.6  |
| IPI00027444 | SERPINB1 Leukocyte elastase inhibitor                                | 1.35 |

---

**KOG category [T] Signal transduction mechanisms**

---

|             |                                                                      |      |
|-------------|----------------------------------------------------------------------|------|
| IPI00329572 | PACSIN3 Protein kinase C and casein kinase substrate in neurons 3, i | 1    |
| IPI00015688 | GPC1 Glypican-1                                                      | 2.93 |
| IPI00414289 | GPS1 Isoform 2 of COP9 signalosome complex subunit 1                 | 1    |
| IPI00012833 | PPP4C Serine/threonine-protein phosphatase 4 catalytic subunit       | 1.44 |
| IPI00412344 | SRPK1 Isoform 2 of Serine/threonine-protein kinase SRPK1             | 1.07 |
| IPI00639931 | CAP1 Isoform 2 of Adenylyl cyclase-associated protein 1              | 2.85 |
| IPI00554737 | PPP2R1A Serine/threonine-protein phosphatase 2A 65 kDa regulatory    | 1.37 |
| IPI00012497 | ADRBK1 Beta-adrenergic receptor kinase 1                             | 0.77 |
| IPI00296434 | SLIT1 Isoform 1 of Slit homolog 1 protein                            | 1.37 |
| IPI00893197 | PPP2R4 Protein phosphatase 2A, regulatory subunit B' isoform b       | 1.34 |
| IPI00412672 | PKN1 Isoform 2 of Serine/threonine-protein kinase N1                 | 1.79 |
| IPI00301419 | COPS7A COP9 signalosome complex subunit 7a                           | 0.86 |
| IPI00003783 | MAP2K2 Dual specificity mitogen-activated protein kinase kinase 2    | 1.34 |
| IPI00020124 | PI4K2A Phosphatidylinositol 4-kinase type 2-alpha                    | 1.92 |
| IPI00442073 | CSRP1 Cysteine and glycine-rich protein 1                            | 0.9  |
| IPI00411984 | STK3 cDNA FLJ16404 fis, clone UTERU2008019, highly similar to        | 0.72 |
| IPI00004838 | CRK Isoform Crk-II of Adapter molecule crk                           | 1.19 |
| IPI00926625 | ZYX Zyxin                                                            | 4.39 |
| IPI00003479 | MAPK1 Mitogen-activated protein kinase 1                             | 1.57 |
| IPI00219110 | NCS1 Neuronal calcium sensor 1                                       | 1.08 |
| IPI00477763 | CDC42BPB Serine/threonine-protein kinase MRCK beta                   | 1.26 |
| IPI00016613 | CSNK2A1 Uncharacterized protein                                      | 1.71 |
| IPI00549204 | NUDT10 Diphosphoinositol polyphosphate phosphohydrolase 3-alpha      | 2.06 |
| IPI00101037 | RCN3 Reticulocalbin-3                                                | 1.64 |
| IPI00008274 | CAP1 Isoform 1 of Adenylyl cyclase-associated protein 1              | 1.69 |
| IPI00009301 | COPS7B Isoform 1 of COP9 signalosome complex subunit 7b              | 1.5  |
| IPI00298306 | ATM Serine-protein kinase ATM                                        | 1.15 |

|             |                                                                               |      |
|-------------|-------------------------------------------------------------------------------|------|
| IPI00029263 | FER Isoform 1 of Tyrosine-protein kinase Fer                                  | 1.87 |
| IPI00020961 | BCL2 Isoform Alpha of Apoptosis regulator Bcl-2                               | 0.79 |
| IPI00011285 | CAPN1 Calpain-1 catalytic subunit                                             | 1.18 |
| IPI00306406 | RIOK2 Serine/threonine-protein kinase RIO2                                    | 1.32 |
| IPI00016373 | RAB13 Ras-related protein Rab-13                                              | 0.99 |
| IPI00152011 | ARHGAP29 Isoform 1 of Rho GTPase-activating protein 29                        | 0.35 |
| IPI00333140 | DNER Delta and Notch-like epidermal growth factor-related receptor            | 3.56 |
| IPI00000151 | ITGB6 Integrin beta-6                                                         | 1    |
| IPI00554711 | JUP Junction plakoglobin                                                      | 2.84 |
| IPI00020178 | STAM Isoform 1 of Signal transducing adapter molecule 1                       | 2.24 |
| IPI00966770 | COPS4 Uncharacterized protein                                                 | 0.88 |
| IPI00018813 | COPS2 Isoform 2 of COP9 signalosome complex subunit 2                         | 0.85 |
| IPI00019983 | BCL2L1 Isoform Bcl-X(L) of Bcl-2-like protein 1                               | 1.3  |
| IPI00480028 | AB11 Uncharacterized protein                                                  | 1.25 |
| IPI00027175 | SRI Sorcin                                                                    | 1.21 |
| IPI00220158 | ADD1 Isoform 3 of Alpha-adducin                                               | 1.89 |
| IPI00291007 | SCARB1 Isoform 3 of Scavenger receptor class B member 1                       | 0.08 |
| IPI00894409 | CPNE1 copine-1 isoform b                                                      | 1.8  |
| IPI00009319 | NCKIPSD Isoform 1 of NCK-interacting protein with SH3 domain                  | 1.21 |
| IPI00294501 | DHCR7 7-dehydrocholesterol reductase                                          | 3.29 |
| IPI00023939 | RABIF Guanine nucleotide exchange factor MSS4                                 | 2.06 |
| IPI00024709 | IKBKB Isoform 1 of Inhibitor of nuclear factor kappa-B kinase subunit 1       | 1.26 |
| IPI00032970 | OSBPL11 Oxysterol-binding protein-related protein 11                          | 1.68 |
| IPI00019459 | TAB1 TGF-beta-activated kinase 1 and MAP3K7-binding protein 1                 | 1.08 |
| IPI00909387 | GHITM cDNA FLJ59630, highly similar to Growth hormone-inducible protein 1     | 0.67 |
| IPI00010080 | OXSR1 Serine/threonine-protein kinase OSR1                                    | 1.38 |
| IPI01011193 | PTK2 Uncharacterized protein                                                  | 1.1  |
| IPI00384187 | SEPT3 Isoform 1 of Neuronal-specific septin-3                                 | 1.81 |
| IPI00290110 | PDCD4 Programmed cell death protein 4                                         | 0.66 |
| IPI00032826 | ST13 Hsc70-interacting protein                                                | 0.96 |
| IPI00292135 | LBR Lamin-B receptor                                                          | 2.74 |
| IPI00075248 | CALM3;CALM2;CALM1 Calmodulin                                                  | 1.03 |
| IPI00005719 | RAB1A Isoform 1 of Ras-related protein Rab-1A                                 | 0.98 |
| IPI00218924 | CHP Calcium-binding protein p22                                               | 0.96 |
| IPI00395654 | PRKACB Isoform 1 of cAMP-dependent protein kinase catalytic subunit           | 2.14 |
| IPI00009342 | IQGAP1 Ras GTPase-activating-like protein IQGAP1                              | 1.41 |
| IPI00020898 | RPS6KA3 Ribosomal protein S6 kinase alpha-3                                   | 1.22 |
| IPI00015161 | PDE6D Retinal rod rhodopsin-sensitive cGMP 3',5'-cyclic phosphodiesterase     | 2.25 |
| IPI00398700 | GNAO1 Isoform Alpha-2 of Guanine nucleotide-binding protein G(o)              | 2.91 |
| IPI00294879 | RANGAP1 Ran GTPase-activating protein 1                                       | 0.81 |
| IPI00260090 | ELMO2 cDNA FLJ60834, highly similar to Engulfment and cell motility protein 2 | 1.98 |
| IPI00027240 | GNG5 Guanine nucleotide-binding protein G(I)/G(S)/G(O) subunit gamma          | 1.74 |
| IPI00031747 | AKT3 Isoform 1 of RAC-gamma serine/threonine-protein kinase                   | 0.99 |
| IPI00448798 | CSNK1A1 Isoform 2 of Casein kinase I isoform alpha                            | 1.53 |
| IPI00942869 | CTNND1 Isoform 1ABC of Catenin delta-1                                        | 0.95 |
| IPI00385987 | DAGLB Isoform 1 of Sn1-specific diacylglycerol lipase beta                    | 1.2  |
| IPI00295738 | MAP3K7 Isoform 1B of Mitogen-activated protein kinase kinase kinase           | 1.98 |
| IPI00021267 | EPHA2 Ephrin type-A receptor 2                                                | 0.93 |
| IPI00902610 | FHL1 Uncharacterized protein                                                  | 1.93 |
| IPI00007641 | IRAK4 Isoform 1 of Interleukin-1 receptor-associated kinase 4                 | 0.95 |
| IPI00329441 | RAB43 Ras-related protein Rab-43                                              | 2.49 |
| IPI00306543 | GDF15 Growth/differentiation factor 15                                        |      |
| IPI00025721 | COPS3 COP9 signalosome complex subunit 3                                      | 0.78 |
| IPI00031836 | DRG1 Developmentally-regulated GTP-binding protein 1                          | 1.57 |
| IPI00939159 | CAP1 Adenylyl cyclase-associated protein                                      | 0.89 |
| IPI00301561 | TRIP6 Thyroid receptor-interacting protein 6                                  | 1.91 |
| IPI00002538 | PDPK1 Isoform 1 of 3-phosphoinositide-dependent protein kinase 1              | 1.13 |

|             |                                                                       |      |
|-------------|-----------------------------------------------------------------------|------|
| IPI00024097 | TES Isoform 1 of Testin                                               | 2.1  |
| IPI00305551 | GNA11 Guanine nucleotide-binding protein subunit alpha-11             | 1.41 |
| IPI00163849 | EPS15L1 cDNA FLJ60624, highly similar to Epidermal growth factor      | 1.4  |
| IPI00009480 | COPS8 COP9 signalosome complex subunit 8                              | 1.24 |
| IPI00009329 | UTRN Utrophin                                                         | 1.09 |
| IPI00329236 | PRKCD Protein kinase C delta type                                     | 1.14 |
| IPI00019018 | TM7SF2 Isoform 1 of Delta(14)-sterol reductase                        | 3.07 |
| IPI00293613 | TBK1 Serine/threonine-protein kinase TBK1                             | 1.77 |
| IPI00005777 | MAPKAPK3 MAP kinase-activated protein kinase 3                        | 0.8  |
| IPI00102856 | SMAP2 Isoform 1 of Stromal membrane-associated protein 2              |      |
| IPI00163644 | OSBPL8 Oxysterol-binding protein                                      | 2    |
| IPI00395627 | CACYBP Isoform 1 of Calcyclin-binding protein                         | 0.64 |
| IPI00014978 | PPP2R5A Serine/threonine-protein phosphatase 2A 56 kDa regulatory     | 1.73 |
| IPI00011676 | WASL Neural Wiskott-Aldrich syndrome protein                          | 0.95 |
| IPI00012866 | AKT1 RAC-alpha serine/threonine-protein kinase                        | 0.89 |
| IPI00065671 | UCK2 Isoform 1 of Uridine-cytidine kinase 2                           | 0.94 |
| IPI00008380 | PPP2CA Serine/threonine-protein phosphatase 2A catalytic subunit al   | 0.97 |
| IPI00218236 | PPP1CB Serine/threonine-protein phosphatase PP1-beta catalytic subu   | 1.2  |
| IPI00005104 | CHUK Inhibitor of nuclear factor kappa-B kinase subunit alpha         | 1.13 |
| IPI00144293 | YTHDC1 Isoform 1 of YTH domain-containing protein 1                   |      |
| IPI00219604 | MAP2K1 Isoform 1 of Dual specificity mitogen-activated protein kina   | 1.29 |
| IPI00291412 | PPM1F Protein phosphatase 1F                                          | 0.91 |
| IPI00386229 | BAK1P1;BAK1 Uncharacterized protein                                   | 1.49 |
| IPI00033600 | PPP1R7 Isoform 1 of Protein phosphatase 1 regulatory subunit 7        | 1.2  |
| IPI00166680 | MINK1 Isoform 3 of Misshapen-like kinase 1                            | 1.39 |
| IPI00798041 | PPP2R2A serine/threonine-protein phosphatase 2A 55 kDa regulatory     | 1.11 |
| IPI00026546 | PAFAH1B2 Platelet-activating factor acetylhydrolase IB subunit beta   | 1.95 |
| IPI00006164 | ILKAP Integrin-linked kinase-associated serine/threonine phosphatas   | 0.84 |
| IPI00018235 | PEF1 Peflin                                                           | 1.01 |
| IPI00218858 | MAP2K3 Isoform 2 of Dual specificity mitogen-activated protein kina   | 0.77 |
| IPI00019904 | ADD2;LOC440354 Isoform 1 of Beta-adducin                              | 0.96 |
| IPI00009958 | COPS5 COP9 signalosome complex subunit 5                              | 0.84 |
| IPI00333143 | DGKA Isoform 1 of Diacylglycerol kinase alpha                         | 2.59 |
| IPI00784414 | STAT3 Isoform 1 of Signal transducer and activator of transcription 3 | 1.39 |
| IPI00016255 | PLBD1 Phospholipase B-like 1                                          | 0.59 |
| IPI00003815 | ARHGDI1 Rho GDP-dissociation inhibitor 1                              | 1    |
| IPI00014264 | ACAP2 Arf-GAP with coiled-coil, ANK repeat and PH domain-contai       | 1.56 |
| IPI00002208 | STAMBPL1 Isoform 2 of AMSH-like protease                              | 1.93 |
| IPI00477982 | RPS6KA1 Isoform 2 of Ribosomal protein S6 kinase alpha-1              | 1.74 |
| IPI00001485 | BMP15 Bone morphogenetic protein 15                                   | 1.22 |
| IPI00103380 | ARAP3 Arf-GAP with Rho-GAP domain, ANK repeat and PH domain           | 0.52 |
| IPI00883896 | LIMA1 Isoform 4 of LIM domain and actin-binding protein 1             | 0.57 |
| IPI00029046 | MLEC Malectin                                                         | 1.65 |
| IPI00013981 | YES1 Tyrosine-protein kinase Yes                                      | 1.5  |
| IPI00163230 | COPS6 COP9 signalosome complex subunit 6                              | 1.03 |
| IPI00307758 | PITPNM1 Isoform 1 of Membrane-associated phosphatidylinositol tra     | 1.5  |
| IPI00289758 | CAPN2 Calpain-2 catalytic subunit                                     | 1.05 |
| IPI00020602 | CSNK2A2 Casein kinase II subunit alpha'                               | 1.26 |
| IPI00024006 | PIK3R4 Phosphoinositide 3-kinase regulatory subunit 4                 | 1.07 |
| IPI00024282 | RAB8B Ras-related protein Rab-8B                                      | 1.57 |
| IPI00290738 | PICALM Isoform 1 of Phosphatidylinositol-binding clathrin assembly    | 0.97 |
| IPI00026848 | LRPAP1 Alpha-2-macroglobulin receptor-associated protein              | 1.14 |
| IPI00025277 | PDCD6 Programmed cell death protein 6                                 | 1.14 |
| IPI00105620 | RRAGA Ras-related GTP-binding protein A                               | 1.8  |
| IPI00009057 | G3BP2 Isoform A of Ras GTPase-activating protein-binding protein 2    | 3.03 |
| IPI00004839 | CRKL Crk-like protein                                                 | 1.97 |
| IPI00290928 | GNA13 Guanine nucleotide-binding protein subunit alpha-13             | 1.68 |

|             |                                                                     |      |
|-------------|---------------------------------------------------------------------|------|
| IPI00012442 | G3BP1 Ras GTPase-activating protein-binding protein 1               | 1.29 |
| IPI00025084 | CAPNS1 Calpain small subunit 1                                      | 1.3  |
| IPI00013219 | ILK Integrin-linked protein kinase                                  | 1.56 |
| IPI00748145 | GNAI2 Isoform 1 of Guanine nucleotide-binding protein G(i) subunit  | 1.41 |
| IPI01015350 | OSBPL9 Oxysterol-binding protein                                    | 0.98 |
| IPI01014546 | PRMT1 protein arginine N-methyltransferase 1 isoform 1              | 0.86 |
| IPI00095891 | GNAS Isoform XLas-1 of Guanine nucleotide-binding protein G(s) su   | 1.55 |
| IPI00305384 | NUDT11 Diphosphoinositol polyphosphate phosphohydrolase 3-beta      | 1.16 |
| IPI00029056 | SEPHS1 Selenide, water dikinase 1                                   | 1.4  |
| IPI00221231 | NUDT2 Bis(5'-nucleosyl)-tetrakisphosphatase [asymmetrical]          | 1.19 |
| IPI00016906 | SEPHS2 Selenide, water dikinase 2                                   | 2.52 |
| IPI00294962 | SH3KBP1 Isoform 1 of SH3 domain-containing kinase-binding protei    | 1.24 |
| IPI00014219 | SNX17 Sorting nexin-17                                              | 3.58 |
| IPI00070643 | FAF1 Isoform Long of FAS-associated factor 1                        | 1.09 |
| IPI00032187 | NISCH Isoform 1 of Nischarin                                        | 0.92 |
| IPI00550746 | NUDC Nuclear migration protein nudC                                 | 0.89 |
| IPI00917964 | MPP6 Uncharacterized protein                                        | 1.25 |
| IPI00000030 | PPP2R5D Isoform Delta-1 of Serine/threonine-protein phosphatase 2/  | 1.13 |
| IPI00218268 | SIGMAR1 Isoform 1 of Sigma non-opioid intracellular receptor 1      | 1.15 |
| IPI00412771 | CD2AP CD2-associated protein                                        | 1.68 |
| IPI00006176 | HGS Isoform 1 of Hepatocyte growth factor-regulated tyrosine kinase | 1.17 |
| IPI00008964 | RAB1B Ras-related protein Rab-1B                                    | 1.17 |
| IPI00005264 | PKP2 Isoform 2 of Plakophilin-2                                     | 1.42 |
| IPI00019148 | IGBP1 Immunoglobulin-binding protein 1                              | 1.48 |
| IPI00019169 | SH3GL1 endophilin-A2 isoform 1                                      | 1.49 |
| IPI00032050 | WBP2 WW domain-binding protein 2                                    | 1.84 |
| IPI00640088 | CSNK2B Uncharacterized protein                                      | 1.88 |
| IPI00014340 | PPP1R12C Isoform 1 of Protein phosphatase 1 regulatory subunit 12C  | 1.35 |
| IPI00021327 | GRB2 Isoform 1 of Growth factor receptor-bound protein 2            | 0.85 |
| IPI00009982 | TDRKH Tudor and KH domain-containing protein                        |      |
| IPI00003765 | CAPN7 Calpain-7                                                     | 0.1  |
| IPI00909904 | STK24 cDNA FLJ61383, highly similar to Serine/threonine-protein k   | 1.1  |
| IPI00419979 | PAK2;LOC646214 Serine/threonine-protein kinase PAK 2                | 1.05 |
| IPI00916402 | AAK1 Isoform 1 of AP2-associated protein kinase 1                   | 0.94 |
| IPI00002857 | MAPK14 Isoform CSBP2 of Mitogen-activated protein kinase 14         | 1.06 |
| IPI00643259 | ARHGEF2 Rho/rac guanine nucleotide exchange factor (GEF) 2, isofc   | 1.6  |
| IPI00005223 | SMAD9 Isoform A of Mothers against decapentaplegic homolog 9        | 4.71 |
| IPI00789155 | CALU calumenin isoform c precuros                                   | 1.53 |
| IPI00002824 | CSRP2 Cysteine and glycine-rich protein 2                           | 0.59 |
| IPI00021831 | PRKAR1A cAMP-dependent protein kinase type I-alpha regulatory su    | 1.44 |
| IPI00019353 | AGK Isoform 1 of Acylglycerol kinase, mitochondrial                 | 2.85 |
| IPI00012795 | EIF3I Eukaryotic translation initiation factor 3 subunit I          | 0.83 |
| IPI00847689 | HTATIP2 Isoform 3 of Oxidoreductase HTATIP2                         | 1.9  |
| IPI00069084 | TRRAP Isoform 1 of Transformation/transcription domain-associated   | 1.45 |
| IPI00301058 | VASP Vasodilator-stimulated phosphoprotein                          | 1.8  |
| IPI00398828 | SH3GLB2 Isoform 2 of Endophilin-B2                                  | 2.17 |
| IPI00219774 | PRKAR2A cAMP-dependent protein kinase type II-alpha regulatory s    | 1.1  |
| IPI00643554 | RGS10 Isoform 3 of Regulator of G-protein signaling 10              | 1.38 |
| IPI00328867 | SRC Isoform 2 of Proto-oncogene tyrosine-protein kinase Src         | 1.06 |
| IPI00003369 | LIMD1 LIM domain-containing protein 1                               | 2.03 |
| IPI00011875 | IK Protein Red                                                      | 0.82 |
| IPI00396630 | PRKACA Isoform 1 of cAMP-dependent protein kinase catalytic subu    | 1.45 |
| IPI00017292 | CTNNB1 Isoform 1 of Catenin beta-1                                  | 1.13 |
| IPI00386862 | ZFYVE19 Isoform 1 of Zinc finger FYVE domain-containing protein     | 0.89 |
| IPI00980645 | PBK cDNA FLJ58333, highly similar to T-lymphokine-activated kille   | 0.96 |
| IPI00022150 | PIP5K1A Isoform 1 of Phosphatidylinositol-4-phosphate 5-kinase typ  | 1.81 |
| IPI00012870 | AKT2 RAC-beta serine/threonine-protein kinase                       | 0.88 |

|             |                                                                            |      |
|-------------|----------------------------------------------------------------------------|------|
| IPI00220031 | PXN Isoform Gamma of Paxillin                                              | 1.04 |
| IPI00297322 | ARFGAP2 ADP-ribosylation factor GTPase-activating protein 2                | 0.75 |
| IPI00917487 | PPP3R1 Uncharacterized protein                                             | 1.3  |
| IPI00000070 | LDLR Low-density lipoprotein receptor                                      | 1.39 |
| IPI00385449 | PRKCA Protein kinase C alpha type                                          | 2.48 |
| IPI00016513 | RAB10 Ras-related protein Rab-10                                           | 1.2  |
| IPI00000335 | HINT2 Histidine triad nucleotide-binding protein 2, mitochondrial          | 1.74 |
| IPI00070943 | PI4KA Isoform 1 of Phosphatidylinositol 4-kinase alpha                     | 4.53 |
| IPI00013043 | TPPP Tubulin polymerization-promoting protein                              | 1.59 |
| IPI00218187 | PPP1CC Isoform Gamma-2 of Serine/threonine-protein phosphatase F           | 0.6  |
| IPI00027009 | PACSIN2 Isoform 1 of Protein kinase C and casein kinase substrate ir       | 0.95 |
| IPI00903328 | AGFG1 arf-GAP domain and FG repeats-containing protein 1 isoform           | 1.15 |
| IPI00289819 | IGF2R Cation-independent mannose-6-phosphate receptor                      | 2.59 |
| IPI00015842 | RCN1 Reticulocalbin-1                                                      | 2.12 |
| IPI00018195 | MAPK3 Mitogen-activated protein kinase 3                                   | 2.15 |
| IPI00064767 | ARHGAP17 Isoform 1 of Rho GTPase-activating protein 17                     | 1.3  |
| IPI00220578 | GNAI3 Guanine nucleotide-binding protein G(k) subunit alpha                | 0.91 |
| IPI00658023 | PTPN11 Isoform 1 of Tyrosine-protein phosphatase non-receptor type         | 1.06 |
| IPI00022697 | DRG2 Developmentally-regulated GTP-binding protein 2                       | 0.71 |
| IPI00026154 | PRKCSH cDNA FLJ59211, highly similar to Glucosidase 2 subunit b            | 1.41 |
| IPI00221232 | GNG12 Guanine nucleotide-binding protein G(I)/G(S)/G(O) subunit $\epsilon$ | 4.32 |
| IPI00030781 | STAT1 Isoform Alpha of Signal transducer and activator of transcript       | 3.05 |
| IPI00154515 | SNIP1 Smad nuclear-interacting protein 1                                   | 0.89 |
| IPI00023704 | LPP Lipoma-preferred partner                                               | 2.38 |
| IPI00023122 | PDLIM7 Isoform 1 of PDZ and LIM domain protein 7                           | 2.38 |
| IPI00550451 | PPP1CA Serine/threonine-protein phosphatase PP1-alpha catalytic sul        | 1.05 |
| IPI00026850 | TSPO Translocator protein                                                  | 1.38 |
| IPI00855767 | RAP1GDS1 rap1 GTPase-GDP dissociation stimulator 1 isoform 1               | 1.04 |
| IPI01022298 | LETMD1 cDNA FLJ45633 fis, clone CHONS2002419, highly similar               | 1.21 |
| IPI01018062 | SH3GLB1 endophilin-B1 isoform 2                                            | 1.21 |
| IPI00010414 | PDLIM1 PDZ and LIM domain protein 1                                        | 1.49 |
| IPI00009688 | PIP4K2A Phosphatidylinositol-5-phosphate 4-kinase type-2 alpha             | 2.23 |
| IPI00018451 | CIB1 Calcium and integrin-binding protein 1                                | 5.42 |
| IPI00419847 | SORBS3 Isoform Alpha of Vinexin                                            | 0.6  |
| IPI00030389 | ABR Isoform Long of Active breakpoint cluster region-related protein       | 1.25 |
| IPI00828080 | ARAP1 Isoform 6 of Arf-GAP with Rho-GAP domain, ANK repeat ar              | 2.47 |
| IPI00031629 | PDCL3 Phosducin-like protein 3                                             | 0.55 |
| IPI00410287 | PRKAA1 Isoform 2 of 5'-AMP-activated protein kinase catalytic subu         | 1.04 |
| IPI00021326 | SHC1 Isoform 6 of SHC-transforming protein 1                               | 2    |
| IPI00005707 | MRC2 C-type mannose receptor 2                                             | 4.05 |
| IPI00028481 | RAB8A Ras-related protein Rab-8A                                           | 1.02 |
| IPI00022542 | ROCK1 Rho-associated protein kinase 1                                      | 0.96 |
| IPI00157365 | NUB1 NEDD8 ultimate buster 1                                               | 1.21 |
| IPI00410226 | BOLA2B;BOLA2 Isoform 2 of Bola-like protein 2                              | 0.93 |
| IPI00395605 | ARHGEF1 Isoform 3 of Rho guanine nucleotide exchange factor 1              | 0.93 |
| IPI00290542 | STAM2 Isoform 1 of Signal transducing adapter molecule 2                   | 3    |
| IPI00003293 | DGKE Diacylglycerol kinase epsilon                                         | 2.19 |
| IPI00293652 | IRAK1 Isoform 1 of Interleukin-1 receptor-associated kinase 1              | 1.63 |
| IPI00007943 | STAMPB STAM-binding protein                                                | 1.14 |
| IPI00299263 | ARFGAP3 ADP-ribosylation factor GTPase-activating protein 3                | 1.03 |
| IPI00291607 | ITPR3 Inositol 1,4,5-trisphosphate receptor type 3                         | 1.91 |
| IPI00292134 | EPS15 Isoform 1 of Epidermal growth factor receptor substrate 15           | 2.13 |
| IPI00746360 | RIC8A Isoform 1 of Synembryn-A                                             | 1.3  |
| IPI00399054 | CRK Isoform Crk-I of Adapter molecule crk                                  | 1.53 |
| IPI00411730 | PPP4R1 Isoform 1 of Serine/threonine-protein phosphatase 4 regulato        | 1.17 |
| IPI00790214 | RCN2 Uncharacterized protein                                               | 2.79 |
| IPI00020567 | ARHGAP1 Rho GTPase-activating protein 1                                    | 2.24 |

|             |                                                                               |      |
|-------------|-------------------------------------------------------------------------------|------|
| IPI00217766 | SCARB2 Lysosome membrane protein 2                                            | 5.48 |
| IPI00183002 | PPP1R12A Isoform 1 of Protein phosphatase 1 regulatory subunit 12A            | 0.88 |
| IPI00217069 | RPS6KB2 Ribosomal protein S6 kinase beta-2                                    | 1.71 |
| IPI00009148 | NUDT3 Diphosphoinositol polyphosphate phosphohydrolase 1                      | 0.44 |
| IPI00945940 | MST4 cDNA, FLJ79036, highly similar to Serine/threonine-protein kinase        | 1.53 |
| IPI00023530 | CDK5 Cyclin-dependent kinase 5                                                | 1.1  |
| IPI00152303 | PIP4K2C Phosphatidylinositol-5-phosphate 4-kinase type-2 gamma                | 1.44 |
| IPI00217563 | ITGB1 Isoform Beta-1A of Integrin beta-1                                      | 2.18 |
| IPI00024403 | CPNE3 Copine-3                                                                | 1.84 |
| IPI00219344 | HPCAL1 Hippocalcin-like protein 1                                             | 1.79 |
| IPI00297261 | PTPN1 Tyrosine-protein phosphatase non-receptor type 1                        | 1.01 |
| IPI00394989 | FAIM Isoform 2 of Fas apoptotic inhibitory molecule 1                         | 0.75 |
| IPI00014808 | PAFAH1B3 Platelet-activating factor acetylhydrolase IB subunit gamma          | 1.52 |
| IPI00024705 | GIPC1 PDZ domain-containing protein GIPC1                                     | 1.56 |
| IPI00008034 | RAB23 Ras-related protein Rab-23                                              | 1.35 |
| IPI01013306 | L1CAM Uncharacterized protein                                                 |      |
| IPI00307155 | ROCK2 Rho-associated protein kinase 2                                         | 1.16 |
| IPI00027342 | CAP2 Adenylyl cyclase-associated protein 2                                    | 0.51 |
| IPI01015186 | HMHA1 HMHA1 protein (Fragment)                                                | 3.55 |
| IPI00953461 | LARP4B La-related protein 4B                                                  | 2.1  |
| IPI00002853 | PPP2R5E Serine/threonine-protein phosphatase 2A 56 kDa regulatory 1           |      |
| IPI00472451 | VAV2 Isoform 1 of Guanine nucleotide exchange factor VAV2                     | 0.72 |
| IPI00656138 | PAK1 Isoform 1 of Serine/threonine-protein kinase PAK 1                       | 1.4  |
| IPI00002790 | SEL1L Isoform 1 of Protein sel-1 homolog 1                                    | 1.42 |
| IPI00219861 | ACP1 Isoform 1 of Low molecular weight phosphotyrosine protein phosphatase    | 1.82 |
| IPI00847665 | LIMS1 LIM and senescent cell antigen-like-containing domain protein 1         | 0.99 |
| IPI00218847 | ACP1 Isoform 2 of Low molecular weight phosphotyrosine protein phosphatase    | 1.03 |
| IPI00239077 | HINT1 Histidine triad nucleotide-binding protein 1                            | 1.52 |
| IPI00012970 | PPP6C Isoform 1 of Serine/threonine-protein phosphatase 6 catalytic subunit   | 0.93 |
| IPI00552671 | PLXNA1 Plexin-A1                                                              | 1.58 |
| IPI00103142 | NUDCD2 NudC domain-containing protein 2                                       | 1.15 |
| IPI00848226 | GNB2L1 Guanine nucleotide-binding protein subunit beta-2-like 1               | 0.84 |
| IPI00030328 | SRR Serine racemase                                                           | 1.34 |
| IPI00011488 | STK4 Isoform 1 of Serine/threonine-protein kinase 4                           | 1.83 |
| IPI00965234 | CAMK2D cDNA FLJ53470, highly similar to Calcium/calmodulin-dependent kinase   | 1.67 |
| IPI00337415 | GNAI1 Guanine nucleotide-binding protein G(i) subunit alpha-1                 | 1.55 |
| IPI00157757 | MICAL1 cDNA FLJ56489, highly similar to NEDD9-interacting protein             | 1.57 |
| IPI00794806 | PDP1 [Pyruvate dehydrogenase [acetyl-transferring]]-phosphatase 1, regulatory | 2.12 |
| IPI00107831 | PTPRF Isoform 1 of Receptor-type tyrosine-protein phosphatase F               | 1.9  |
| IPI00182180 | OTUD6B OTU domain-containing protein 6B                                       | 0.95 |
| IPI00032409 | LAMTOR2 Isoform 1 of Ragulator complex protein LAMTOR2                        | 1.56 |
| IPI00154645 | TBC1D15 Isoform 1 of TBC1 domain family member 15                             | 1.02 |
| IPI00936125 | DIAPH1 Diaphanous 1                                                           | 1.01 |

---

**KOG category [M] Cell wall/membrane/envelope biogenesis**

---

|             |                                                                  |      |
|-------------|------------------------------------------------------------------|------|
| IPI00003861 | UGCG Ceramide glucosyltransferase                                | 3.13 |
| IPI00002790 | SEL1L Isoform 1 of Protein sel-1 homolog 1                       | 1.42 |
| IPI00009960 | IMMT Isoform 1 of Mitochondrial inner membrane protein           | 1.14 |
| IPI00000684 | UAP1 Isoform AGX2 of UDP-N-acetylhexosamine pyrophosphorylase    | 0.77 |
| IPI00383581 | GANAB cDNA FLJ61290, highly similar to Neutral alpha-glucosidase | 8.3  |
| IPI00005181 | PLSCR1 Phospholipid scramblase 1                                 | 3.22 |
| IPI00007052 | FIS1 Mitochondrial fission 1 protein                             | 1.99 |
| IPI00025346 | PEX14 Isoform 1 of Peroxisomal membrane protein PEX14            | 1.12 |
| IPI00100030 | PIGT Isoform 1 of GPI transamidase component PIG-T               | 1.19 |
| IPI00011454 | GANAB Isoform 2 of Neutral alpha-glucosidase AB                  | 2.31 |
| IPI00002496 | GMPPB Isoform 2 of Mannose-1-phosphate guanyltransferase beta    | 1.63 |
| IPI00657888 | GMPPA Isoform 2 of Mannose-1-phosphate guanyltransferase alpha   | 2.01 |
| IPI00032002 | PIGL N-acetylglucosaminyl-phosphatidylinositol de-N-acetylase    | 1.4  |

|             |                                                                       |      |
|-------------|-----------------------------------------------------------------------|------|
| IPI00005585 | TAX1BP3 Tax1-binding protein 3                                        | 1.49 |
| IPI00021048 | MYOF Isoform 1 of Myoferlin                                           | 1.53 |
| IPI00553131 | GALE UDP-glucose 4-epimerase                                          | 1.97 |
| IPI00217952 | GFPT1 Isoform 1 of Glucosamine--fructose-6-phosphate aminotransferase | 1.23 |
| IPI00061525 | GNPNAT1 Glucosamine 6-phosphate N-acetyltransferase                   | 0.93 |
| IPI00465308 | PIGS Isoform 1 of GPI transamidase component PIG-S                    | 1.28 |

---

**KOG category [N] Cell motility**

|             |                                        |      |
|-------------|----------------------------------------|------|
| IPI00019495 | DYNLT1 Dynein light chain Tctex-type 1 | 0.95 |
| IPI00220827 | TMSB10 Thymosin beta-10                | 2.12 |
| IPI00009329 | UTRN Utrophin                          | 1.09 |

---

**KOG category [Z] Cytoskeleton**

|             |                                                                                 |      |
|-------------|---------------------------------------------------------------------------------|------|
| IPI00013475 | TUBB2A Tubulin beta-2A chain                                                    | 1.47 |
| IPI00021634 | KLC2 Kinesin light chain 2                                                      | 0.95 |
| IPI00019329 | DYNLL1 Dynein light chain 1, cytoplasmic                                        | 1.15 |
| IPI00329572 | PACSIN3 Protein kinase C and casein kinase substrate in neurons 3, isoform 1    | 1.1  |
| IPI00867509 | CORO1C Coronin-1C_i3 protein                                                    | 1.38 |
| IPI00013455 | CLIP1 Isoform 1 of CAP-Gly domain-containing linker protein 1                   | 1.1  |
| IPI00790503 | MYH10 Isoform 3 of Myosin-10                                                    | 1    |
| IPI00639931 | CAP1 Isoform 2 of Adenylyl cyclase-associated protein 1                         | 2.85 |
| IPI01019113 | TUBB Tubulin beta chain                                                         | 1.07 |
| IPI00062037 | DYNLL2 Dynein light chain 2, cytoplasmic                                        | 1.08 |
| IPI00871851 | SEPT2 Isoform 2 of Septin-2                                                     | 1.52 |
| IPI00216135 | TPM1 Isoform 3 of Tropomyosin alpha-1 chain                                     | 0.44 |
| IPI00304232 | WDR12 Ribosome biogenesis protein WDR12                                         | 0.98 |
| IPI00220154 | MYO5A Isoform 3 of Myosin-Va                                                    | 0.7  |
| IPI00219468 | PFN2 Isoform IIa of Profilin-2                                                  | 0.7  |
| IPI00017596 | MAPRE1 Microtubule-associated protein RP/EB family member 1                     | 1.05 |
| IPI00005162 | ARPC3 Actin-related protein 2/3 complex subunit 3                               | 1.64 |
| IPI00442073 | CSRP1 Cysteine and glycine-rich protein 1                                       | 0.9  |
| IPI00033516 | TUBGCP3 Isoform 1 of Gamma-tubulin complex component 3                          | 0.98 |
| IPI00908469 | TUBB6 cDNA FLJ52712, highly similar to Tubulin beta-6 chain                     | 1.13 |
| IPI00003269 | ACTBL2 Beta-actin-like protein 2                                                | 5.34 |
| IPI00002824 | CSRP2 Cysteine and glycine-rich protein 2                                       | 0.59 |
| IPI00744015 | DYNC1I2 Isoform 2A of Cytoplasmic dynein 1 intermediate chain 2                 | 1.81 |
| IPI00029469 | ACTR1B Beta-centractin                                                          | 1.29 |
| IPI00151119 | KIFC3 cDNA FLJ56036, highly similar to Homo sapiens kinesin family 13C member 3 | 0.75 |
| IPI00414554 | ARPC5L Actin-related protein 2/3 complex subunit 5-like protein                 | 1.34 |
| IPI00029468 | ACTR1A Alpha-centractin                                                         | 1.01 |
| IPI00010951 | EPPK1 Epiplakin                                                                 | 5.24 |
| IPI00008274 | CAP1 Isoform 1 of Adenylyl cyclase-associated protein 1                         | 1.69 |
| IPI00216682 | CNN3 Calponin-3                                                                 | 1.17 |
| IPI00021753 | KIF13B Kinesin-like protein KIF13B                                              | 1.3  |
| IPI00306049 | MSTO1 Isoform 1 of Protein misato homolog 1                                     | 0.92 |
| IPI00028091 | ACTR3 Actin-related protein 3                                                   | 1.9  |
| IPI00930688 | TUBA1B Tubulin alpha-1B chain                                                   | 1.19 |
| IPI00298994 | TLN1 Talin-1                                                                    | 1.29 |
| IPI00554711 | JUP Junction plakoglobin                                                        | 2.84 |
| IPI00256861 | MACF1 Isoform 2 of Microtubule-actin cross-linking factor 1, isoform 1          | 1.09 |
| IPI00782965 | HIP1 Huntingtin-interacting protein 1                                           | 1.08 |
| IPI00382894 | TPM3 Uncharacterized protein                                                    | 0.05 |
| IPI00480028 | ABI1 Uncharacterized protein                                                    | 1.25 |
| IPI00794221 | DBN1 Uncharacterized protein                                                    | 1.09 |
| IPI00789041 | PNN Isoform 1 of Pinin                                                          | 1.09 |
| IPI00295081 | TUBG1 Tubulin gamma-1 chain                                                     | 1.8  |
| IPI00746165 | WDR1 Isoform 1 of WD repeat-containing protein 1                                | 1.16 |
| IPI00017292 | CTNNB1 Isoform 1 of Catenin beta-1                                              | 1.13 |
| IPI00220158 | ADD1 Isoform 3 of Alpha-adducin                                                 | 1.89 |



|             |                                                                      |      |
|-------------|----------------------------------------------------------------------|------|
| IPI00005969 | CAPZA1 F-actin-capping protein subunit alpha-1                       | 1.78 |
| IPI00472164 | WASF2 Wiskott-Aldrich syndrome protein family member 2               | 1.27 |
| IPI00220031 | PXN Isoform Gamma of Paxillin                                        | 1.04 |
| IPI00017597 | MAPRE3 Isoform 1 of Microtubule-associated protein RP/EB family r    | 0.67 |
| IPI00009319 | NCKIPSD Isoform 1 of NCK-interacting protein with SH3 domain         | 1.21 |
| IPI00005161 | ARPC2 Actin-related protein 2/3 complex subunit 2                    | 1.02 |
| IPI00180675 | TUBA1A Tubulin alpha-1A chain                                        | 1.6  |
| IPI00984795 | CFL1 Uncharacterized protein                                         | 0.88 |
| IPI00014898 | PLEC Isoform 1 of Plectin                                            | 1.56 |
| IPI00386516 | IST1 cDNA FLJ77725                                                   | 1.1  |
| IPI00336081 | MYLK Isoform 1 of Myosin light chain kinase, smooth muscle           | 1    |
| IPI00003627 | ACTL6A Isoform 1 of Actin-like protein 6A                            | 1.94 |
| IPI00384187 | SEPT3 Isoform 1 of Neuronal-specific septin-3                        | 1.81 |
| IPI00218782 | CAPZB cDNA FLJ60094, highly similar to F-actin capping protein su    | 0.98 |
| IPI00033494 | MYL12B Myosin regulatory light chain 12B                             | 0.88 |
| IPI00027009 | PACSIN2 Isoform 1 of Protein kinase C and casein kinase substrate ir | 0.95 |
| IPI00007750 | TUBA4A Tubulin alpha-4A chain                                        | 1.12 |
| IPI00398779 | PLEC Isoform 4 of Plectin                                            | 1.18 |
| IPI00910593 | CNN2 cDNA FLJ52765, highly similar to Calponin-2                     | 0.91 |
| IPI00178150 | KIF4A Isoform 1 of Chromosome-associated kinesin KIF4A               | 0.41 |
| IPI00013508 | ACTN1 Isoform 1 of Alpha-actinin-1                                   | 1.14 |
| IPI00027253 | GABARAP Gamma-aminobutyric acid receptor-associated protein          | 4.04 |
| IPI00216138 | TAGLN Transgelin                                                     | 0.59 |
| IPI00398002 | PLEC Isoform 3 of Plectin                                            | 2.14 |
| IPI00216691 | PFN1 Profilin-1                                                      | 1.08 |
| IPI00101968 | DBNL Isoform 3 of Drebrin-like protein                               | 1.07 |
| IPI00985452 | CORO7-PAM16 CORO7-PAM16 protein                                      | 1.65 |
| IPI00007752 | TUBB2C Tubulin beta-2C chain                                         | 1.17 |
| IPI00012837 | KIF5B Kinesin-1 heavy chain                                          | 1.02 |
| IPI00031023 | FLII Protein flightless-1 homolog                                    | 1.71 |
| IPI00333068 | ARPC1A Actin-related protein 2/3 complex subunit 1A                  | 0.81 |
| IPI00302690 | ACTR10 Actin-related protein 10                                      | 1.56 |
| IPI00306400 | KIFC1 Kinesin-like protein KIFC1                                     | 0.4  |
| IPI00239406 | SYNE2 Isoform 2 of Nesprin-2                                         | 1.1  |
| IPI00023122 | PDLIM7 Isoform 1 of PDZ and LIM domain protein 7                     | 2.38 |
| IPI00302453 | DNAH9 Isoform 1 of Dynein heavy chain 9, axonemal                    | 0.73 |
| IPI00848334 | KIF2A Isoform 4 of Kinesin-like protein KIF2A                        | 0.95 |
| IPI00435947 | WIPF2 Isoform 1 of WAS/WASL-interacting protein family member 2      |      |
| IPI00902610 | FHL1 Uncharacterized protein                                         | 1.93 |
| IPI00151462 | MAP1LC3B2 Microtubule-associated proteins 1A/1B light chain 3 be     | 4.21 |
| IPI00018240 | SDAD1 Isoform 1 of Protein SDA1 homolog                              | 0.85 |
| IPI00218343 | TUBA1C Tubulin alpha-1C chain                                        | 0.88 |
| IPI00216694 | PLS3 Plastin-3                                                       | 0.96 |
| IPI00939159 | CAP1 Adenylyl cyclase-associated protein                             | 0.89 |
| IPI00008868 | MAP1B Microtubule-associated protein 1B                              | 3.09 |
| IPI00010414 | PDLIM1 PDZ and LIM domain protein 1                                  | 1.49 |
| IPI00029722 | KIF5A Kinesin heavy chain isoform 5A                                 | 1.18 |
| IPI00025890 | NAA25 Isoform 1 of N-alpha-acetyltransferase 25, NatB auxiliary sub  | 1.13 |
| IPI00026182 | CAPZA2 F-actin-capping protein subunit alpha-2                       | 1.33 |
| IPI00024097 | TES Isoform 1 of Testin                                              | 2.1  |
| IPI00844215 | SPTAN1 Isoform 1 of Spectrin alpha chain, brain                      | 0.94 |
| IPI00009329 | UTRN Utrophin                                                        | 1.09 |
| IPI00473014 | DSTN Destrin                                                         | 0.96 |
| IPI00828080 | ARAP1 Isoform 6 of Arf-GAP with Rho-GAP domain, ANK repeat ar        | 2.47 |
| IPI00550234 | ARPC5 Isoform 1 of Actin-related protein 2/3 complex subunit 5       | 1.2  |
| IPI00816452 | MYO6 Isoform 3 of Myosin-VI                                          | 1.17 |
| IPI00017704 | COTL1 Coactosin-like protein                                         | 1.01 |

|             |                                                                    |      |
|-------------|--------------------------------------------------------------------|------|
| IPI00007058 | CORO1B Coronin-1B                                                  | 1.48 |
| IPI00011676 | WASL Neural Wiskott-Aldrich syndrome protein                       | 0.95 |
| IPI00219299 | TLN2 Talin-2                                                       | 1.15 |
| IPI00215928 | CETN2 Centrin-2                                                    | 0.97 |
| IPI00065671 | UCK2 Isoform 1 of Uridine-cytidine kinase 2                        | 0.94 |
| IPI00024734 | DNAL4 Dynein light chain 4, axonemal                               | 2.11 |
| IPI00023006 | ACTC1 Actin, alpha cardiac muscle 1                                | 1.5  |
| IPI00009943 | TPT1 Tumor protein, translationally-controlled 1                   | 1.07 |
| IPI00003326 | ARL2 ADP-ribosylation factor-like protein 2                        | 1.05 |
| IPI00922855 | TUBGCP2 Uncharacterized protein                                    | 1.46 |
| IPI00019904 | ADD2;LOC440354 Isoform 1 of Beta-adducin                           | 0.96 |
| IPI00026358 | GABARAPL2 Gamma-aminobutyric acid receptor-associated protein-     | 4.33 |
| IPI00873991 | DNAH8 537 kDa protein                                              | 1.72 |
| IPI00470573 | ACTR2 actin-related protein 2 isoform a                            | 1.08 |
| IPI00867739 | KIF3A cDNA FLJ60533, highly similar to Kinesin-like protein KIF3   | 1.41 |
| IPI00941534 | SEPT7 Isoform 1 of Septin-7                                        | 2.08 |
| IPI00011735 | IFRD1 Interferon-related developmental regulator 1                 | 0.93 |
| IPI00103380 | ARAP3 Arf-GAP with Rho-GAP domain, ANK repeat and PH domain        | 0.52 |
| IPI00883896 | LIMA1 Isoform 4 of LIM domain and actin-binding protein 1          | 0.57 |
| IPI00020567 | ARHGAP1 Rho GTPase-activating protein 1                            | 2.24 |
| IPI00019502 | MYH9 Isoform 1 of Myosin-9                                         | 0.92 |
| IPI00978953 | TPT1 Uncharacterized protein                                       |      |
| IPI00296485 | MAP1S Microtubule-associated protein 1S                            | 2.04 |
| IPI00413344 | CFL2 Cofilin-2                                                     | 1.04 |
| IPI00218319 | TPM3 Isoform 2 of Tropomyosin alpha-3 chain                        | 0.81 |
| IPI00168849 | TRIP10 Isoform 1 of Cdc42-interacting protein 4                    | 1.56 |
| IPI00290435 | KIF2C Isoform 1 of Kinesin-like protein KIF2C                      | 0.91 |
| IPI00019642 | CLIP2 Isoform 1 of CAP-Gly domain-containing linker protein 2      | 1.69 |
| IPI00005160 | ARPC1B;ARPC1A Actin-related protein 2/3 complex subunit 1B         | 1.13 |
| IPI00016634 | C20orf11 Protein C20orf11                                          | 1    |
| IPI00027342 | CAP2 Adenylyl cyclase-associated protein 2                         | 0.51 |
| IPI00305289 | KIF11 Kinesin-like protein KIF11                                   | 0.51 |
| IPI00032304 | PLS1 Plastin-1                                                     | 1.53 |
| IPI00023598 | TUBB4 Tubulin beta-4 chain                                         | 0.95 |
| IPI00798193 | SNX24 Uncharacterized protein                                      | 1.09 |
| IPI00647915 | TAGLN2 24 kDa protein                                              | 1.48 |
| IPI00243742 | MYL3 Myosin light chain 3                                          | 1.28 |
| IPI00829992 | MYO1C Isoform 3 of Myosin-Ic                                       | 1.37 |
| IPI00013808 | ACTN4 Alpha-actinin-4                                              | 0.93 |
| IPI00004655 | FRG1 Protein FRG1                                                  | 0.67 |
| IPI00847665 | LIMS1 LIM and senescent cell antigen-like-containing domain protei | 0.99 |
| IPI00010779 | TPM4 Isoform 1 of Tropomyosin alpha-4 chain                        | 0.88 |
| IPI00956585 | APOPT1 Kinesin light chain 1                                       | 1.05 |
| IPI00012369 | MAD2L1 Mitotic spindle assembly checkpoint protein MAD2A           | 0.84 |
| IPI00019994 | TXLNG Isoform 1 of Gamma-taxilin                                   | 1.64 |
| IPI00292496 | TUBB8 Tubulin beta-8 chain                                         | 1.01 |
| IPI00925052 | ARPC4;ARPC4-TTLL3 actin-related protein 2/3 complex subunit 4 is   | 1.5  |
| IPI00335711 | DNAH11 Dynein heavy chain 11, axonemal                             | 1.14 |
| IPI00032498 | DCTN5 Dynactin subunit 5                                           | 0.98 |
| IPI00166132 | VPS52 Vacuolar protein sorting-associated protein 52 homolog       | 0.98 |
| IPI00646779 | TUBB6 TUBB6 protein                                                | 0.96 |
| IPI01018712 | ACTA2 ACTA2 protein (Fragment)                                     | 1.45 |
| IPI00157757 | MICAL1 cDNA FLJ56489, highly similar to NEDD9-interacting prot     | 1.57 |
| IPI00013933 | DSP Isoform DPI of Desmoplakin                                     | 2.19 |
| IPI00032187 | NISCH Isoform 1 of Nischarin                                       | 0.92 |
| IPI00936125 | DIAPH1 Diaphanous 1                                                | 1.01 |
| IPI00022790 | MFAP1 Microfibrillar-associated protein 1                          | 2.74 |

| <b>KOG category [W] Extracellular structures</b>                                      |                                                                      |      |
|---------------------------------------------------------------------------------------|----------------------------------------------------------------------|------|
| IPI00306604                                                                           | ITGA5 Integrin alpha-5                                               | 4.81 |
| IPI00290043                                                                           | ITGA3 Isoform 2 of Integrin alpha-3                                  | 4.81 |
| IPI00641172                                                                           | LAMC3 172 kDa protein                                                | 0.78 |
| IPI00217563                                                                           | ITGB1 Isoform Beta-1A of Integrin beta-1                             | 2.18 |
| IPI00465431                                                                           | LGALS3 Galectin-3                                                    | 2.5  |
| IPI00165587                                                                           | LGALS8 Isoform 2 of Galectin-8                                       | 1.82 |
| IPI00550917                                                                           | TWF2 Twinfilin-2                                                     | 2.21 |
| IPI00027505                                                                           | ITGAV Isoform 1 of Integrin alpha-V                                  | 1.52 |
| IPI00552587                                                                           | GADD45GIP1 Growth arrest and DNA damage-inducible proteins-int       | 1.3  |
| IPI00005264                                                                           | PKP2 Isoform 2 of Plakophilin-2                                      | 1.42 |
| IPI00219219                                                                           | LGALS1 Galectin-1                                                    | 1.51 |
| IPI00009505                                                                           | SNTB2 Isoform 1 of Beta-2-syntrophin                                 | 1.06 |
| IPI00296434                                                                           | SLIT1 Isoform 1 of Slit homolog 1 protein                            | 1.37 |
| IPI00009294                                                                           | CRIM1 Cysteine-rich motor neuron 1 protein                           |      |
| IPI00010697                                                                           | ITGA6 Isoform Alpha-6X1X2B of Integrin alpha-6                       | 1.25 |
| IPI00978910                                                                           | GMFB Glia maturation factor beta                                     | 1.11 |
| IPI00942869                                                                           | CTNND1 Isoform 1ABC of Catenin delta-1                               | 0.95 |
| IPI00853454                                                                           | LAMB1 200 kDa protein                                                | 0.97 |
| IPI00023549                                                                           | LGALSL Galectin-related protein                                      | 1.09 |
| IPI00183508                                                                           | TWF1 44 kDa protein                                                  | 1    |
| IPI00013744                                                                           | ITGA2 Integrin alpha-2                                               | 3.09 |
| IPI00000151                                                                           | ITGB6 Integrin beta-6                                                | 1    |
| IPI00296922                                                                           | LAMB2 Laminin subunit beta-2                                         | 4.36 |
| <b>KOG category [U] Intracellular trafficking, secretion, and vesicular transport</b> |                                                                      |      |
| IPI00022744                                                                           | CSE1L Isoform 1 of Exportin-2                                        | 1.01 |
| IPI00329572                                                                           | PACSIN3 Protein kinase C and casein kinase substrate in neurons 3, i | 1    |
| IPI00215920                                                                           | ARF6 ADP-ribosylation factor 6                                       | 1.22 |
| IPI00398009                                                                           | IPO4 Isoform 2 of Importin-4                                         | 1.19 |
| IPI00006072                                                                           | SEC61G Protein transport protein Sec61 subunit gamma                 | 1.69 |
| IPI00009225                                                                           | STX8 Syntaxin-8                                                      | 1.07 |
| IPI00007401                                                                           | IPO8 Importin-8                                                      | 0.87 |
| IPI00218850                                                                           | SCAMP2 Secretory carrier-associated membrane protein 2               | 1.49 |
| IPI00002460                                                                           | ANXA7 Isoform 1 of Annexin A7                                        | 0.91 |
| IPI00783559                                                                           | EXOC2 Exocyst complex component 2                                    | 1.37 |
| IPI00026337                                                                           | RANBP3 Isoform 1 of Ran-binding protein 3                            | 4.93 |
| IPI00015826                                                                           | ABCB10 ATP-binding cassette sub-family B member 10, mitochondri      | 1.56 |
| IPI00871851                                                                           | SEPT2 Isoform 2 of Septin-2                                          | 1.52 |
| IPI00032808                                                                           | RAB3D Ras-related protein Rab-3D                                     | 1.15 |
| IPI00291200                                                                           | NUP133 Nuclear pore complex protein Nup133                           | 1.08 |
| IPI00170796                                                                           | VPS29 Isoform 1 of Vacuolar protein sorting-associated protein 29    | 1.49 |
| IPI00414858                                                                           | COG3 Isoform 1 of Conserved oligomeric Golgi complex subunit 3       | 1.47 |
| IPI00026969                                                                           | SEC23IP Isoform 1 of SEC23-interacting protein                       | 0.98 |
| IPI00104128                                                                           | SEC11A Signal peptidase complex catalytic subunit SEC11A             | 1.32 |
| IPI00300562                                                                           | RAB3B Ras-related protein Rab-3B                                     | 0.74 |
| IPI00946150                                                                           | SSR3 cDNA FLJ52061, highly similar to Translocon-associated prote    | 1.01 |
| IPI00028376                                                                           | TIMM8A Mitochondrial import inner membrane translocase subunit       | 1.14 |
| IPI00429633                                                                           | ERO1LB ERO1-like protein beta                                        | 1.2  |
| IPI00744834                                                                           | STX5 Isoform 1 of Syntaxin-5                                         | 0.97 |
| IPI00025974                                                                           | CHMP4B Charged multivesicular body protein 4b                        | 1.4  |
| IPI00017375                                                                           | SEC23A Protein transport protein Sec23A                              | 1.34 |
| IPI00646361                                                                           | NUP214 Isoform 5 of Nuclear pore complex protein Nup214              | 1.81 |
| IPI00385267                                                                           | SRPR Signal recognition particle receptor subunit alpha              | 0.72 |
| IPI00299033                                                                           | KPNA3 Importin subunit alpha-3                                       | 0.68 |
| IPI00101037                                                                           | RCN3 Reticulocalbin-3                                                | 1.64 |
| IPI00945835                                                                           | SYNJ1 synaptojanin-1 isoform a                                       | 1.89 |
| IPI00410590                                                                           | LSM14A Isoform 2 of Protein LSM14 homolog A                          | 0.7  |

|             |                                                                      |       |
|-------------|----------------------------------------------------------------------|-------|
| IPI00001141 | TIMM22 Mitochondrial import inner membrane translocase subunit       | 10.84 |
| IPI00302238 | AATF Protein AATF                                                    | 0.94  |
| IPI00009822 | SRP54 Signal recognition particle 54 kDa protein                     | 0.93  |
| IPI00295851 | COPB1 Coatomer subunit beta                                          | 1.55  |
| IPI00010438 | SNAP23 Isoform SNAP-23a of Synaptosomal-associated protein 23        | 0.79  |
| IPI00186966 | BIN1 Isoform IIA of Myc box-dependent-interacting protein 1          | 1.17  |
| IPI00395694 | TNPO3 Isoform 2 of Transportin-3                                     | 1.07  |
| IPI00016373 | RAB13 Ras-related protein Rab-13                                     | 0.99  |
| IPI00014376 | RAB31 ras-related protein Rab-31                                     | 1.66  |
| IPI00852806 | EXOC6B Isoform 1 of Exocyst complex component 6B                     | 2.69  |
| IPI00002149 | SAR1B GTP-binding protein SAR1b                                      | 1.3   |
| IPI00747764 | KPNA6 cDNA FLJ53229, highly similar to Importin alpha-7 subunit      | 0.82  |
| IPI00215918 | ARF4 ADP-ribosylation factor 4                                       | 1.03  |
| IPI00006865 | SEC22B Vesicle-trafficking protein SEC22b                            | 1.53  |
| IPI00924556 | SPCS1 Signal peptidase complex subunit 1                             | 5.06  |
| IPI00023939 | RABIF Guanine nucleotide exchange factor MSS4                        | 2.06  |
| IPI00033022 | DNM2 Isoform 1 of Dynamin-2                                          | 1.27  |
| IPI00306290 | XPOT Exportin-T                                                      | 2.06  |
| IPI00023542 | TMED9 Transmembrane emp24 domain-containing protein 9                | 1.01  |
| IPI00446875 | ERGIC3 Uncharacterized protein                                       | 2.3   |
| IPI00007756 | RAB22A Ras-related protein Rab-22A                                   | 1.31  |
| IPI00337667 | BICD2 Isoform 2 of Protein bicaudal D homolog 2                      | 1.01  |
| IPI00411426 | VPS26A Vacuolar protein sorting-associated protein 26A               | 1.11  |
| IPI00328932 | VPS36 Isoform 1 of Vacuolar protein-sorting-associated protein 36    | 1.21  |
| IPI00007402 | IPO7 Importin-7                                                      | 0.81  |
| IPI00646857 | MTX3 Isoform 1 of Metaxin-3                                          | 0.8   |
| IPI00297325 | SDHD Succinate dehydrogenase [ubiquinone] cytochrome b small sub     | 1.02  |
| IPI00873376 | VPS13A Isoform 1 of Vacuolar protein sorting-associated protein 13A  | 0.99  |
| IPI00328913 | VPS28 vacuolar protein sorting-associated protein 28 homolog isoform | 1.56  |
| IPI00005719 | RAB1A Isoform 1 of Ras-related protein Rab-1A                        | 0.98  |
| IPI00656021 | VPS53 vacuolar protein sorting-associated protein 53 homolog isoform | 0.9   |
| IPI00029447 | GOSR1 Golgi SNAP receptor complex member 1                           | 0.92  |
| IPI00032905 | VPS33B Vacuolar protein sorting-associated protein 33B               | 0.95  |
| IPI00743931 | GORASP2 cDNA FLJ59712, highly similar to Golgi reassembly-stack      | 1.62  |
| IPI00167949 | MX1 Interferon-induced GTP-binding protein Mx1                       | 4.54  |
| IPI00604599 | TMED3 Transmembrane emp24 domain-containing protein 3                | 0.67  |
| IPI00294472 | TMED5 Transmembrane emp24 domain-containing protein 5                | 1.1   |
| IPI00023191 | TOM1 cDNA FLJ54710, highly similar to Target of Myb protein 1        | 0.78  |
| IPI00021129 | AP3B1 Isoform 1 of AP-3 complex subunit beta-1                       | 0.93  |
| IPI00793155 | RAB34 ras-related protein Rab-34 isoform 5                           | 1.07  |
| IPI00028051 | VPS41 Isoform Long of Vacuolar protein sorting-associated protein 4  | 1.04  |
| IPI00032831 | SNAP29 Synaptosomal-associated protein 29                            | 1.2   |
| IPI00395768 | STX3 Isoform A of Syntaxin-3                                         | 0.86  |
| IPI00005490 | GOLPH3 Golgi phosphoprotein 3                                        | 1.01  |
| IPI00102815 | NOC3L Nucleolar complex protein 3 homolog                            | 1.45  |
| IPI00940292 | AP1B1 Isoform C of AP-1 complex subunit beta-1                       | 1.74  |
| IPI00329441 | RAB43 Ras-related protein Rab-43                                     | 2.49  |
| IPI00009950 | LMAN2 Vesicular integral-membrane protein VIP36                      | 2.13  |
| IPI00304866 | TNFAIP2 Tumor necrosis factor alpha-induced protein 2                | 2.41  |
| IPI00221325 | RANBP2 E3 SUMO-protein ligase RanBP2                                 | 0.97  |
| IPI00019004 | SEC62 Translocation protein SEC62                                    | 0.75  |
| IPI00293402 | STX10 Isoform 1 of Syntaxin-10                                       | 1.76  |
| IPI00001885 | SNX8 Sorting nexin-8                                                 | 1.21  |
| IPI00790248 | VAMP2 Uncharacterized protein                                        | 1.22  |
| IPI00910194 | NUP153 cDNA FLJ60565, highly similar to Nuclear pore complex pr      | 1.17  |
| IPI00219840 | AP2S1 Isoform 1 of AP-2 complex subunit sigma                        | 1.06  |
| IPI00163849 | EPS15L1 cDNA FLJ60624, highly similar to Epidermal growth factor     | 1.4   |

|             |                                                                          |      |
|-------------|--------------------------------------------------------------------------|------|
| IPI00748788 | MTM1 Myotubularin                                                        | 2.37 |
| IPI00477489 | RAB4B;MIA Isoform 1 of Ras-related protein Rab-4B                        | 1.9  |
| IPI00910882 | TBC1D5 TBC1 domain family member 5 isoform a                             | 1.04 |
| IPI01020803 | COPZ1 Uncharacterized protein                                            | 1.01 |
| IPI00295889 | SRP19 Signal recognition particle 19 kDa protein                         | 1.75 |
| IPI00005651 | IPO13 Importin-13                                                        | 1.88 |
| IPI00790530 | NUP85 Nuclear pore complex protein Nup85                                 | 1.13 |
| IPI00218466 | SEC61A1 cDNA FLJ59739, highly similar to Protein transport protein       | 4.71 |
| IPI00016381 | RAB27A Isoform Long of Ras-related protein Rab-27A                       | 1.06 |
| IPI00913938 | IPO11 Isoform 2 of Importin-11                                           | 1.85 |
| IPI00021985 | TM9SF4 Transmembrane 9 superfamily member 4                              | 1.82 |
| IPI00013930 | STX6 Syntaxin-6                                                          | 1.18 |
| IPI00298961 | XPO1 Exportin-1                                                          | 1.1  |
| IPI00219436 | SEC11C Signal peptidase complex catalytic subunit SEC11C                 | 1.67 |
| IPI00981241 | VPS24 cDNA FLJ58988, highly similar to Charged multivesicular body       | 0.93 |
| IPI00003326 | ARL2 ADP-ribosylation factor-like protein 2                              | 1.05 |
| IPI00300585 | RRAGC Ras-related GTP-binding protein C                                  | 1.63 |
| IPI00021766 | RTN4 Isoform 1 of Reticulon-4                                            | 7.21 |
| IPI00102896 | RAB2B Ras-related protein Rab-2B                                         | 5.94 |
| IPI00026625 | NUP155 Isoform 1 of Nuclear pore complex protein Nup155                  | 1.03 |
| IPI00795671 | RANP1;RAN Uncharacterized protein                                        | 1.11 |
| IPI00892682 | TAP2 antigen peptide transporter 2 isoform 1                             | 2.65 |
| IPI00014587 | CLTA Isoform Brain of Clathrin light chain A                             | 1.2  |
| IPI00298520 | ARCN1 Uncharacterized protein                                            | 1.07 |
| IPI00217943 | RAB6A Isoform 2 of Ras-related protein Rab-6A                            | 1.21 |
| IPI00941534 | SEPT7 Isoform 1 of Septin-7                                              | 2.08 |
| IPI00654799 | AP1S3 Isoform 2 of AP-1 complex subunit sigma-3                          | 1.22 |
| IPI00165651 | ERGIC2 Cd002 protein                                                     | 1.39 |
| IPI00020436 | RAB11B Ras-related protein Rab-11B                                       | 1.15 |
| IPI00719051 | EXOC5 Exocyst complex component 5                                        | 1.14 |
| IPI00140201 | COG8 cDNA FLJ55996, highly similar to Conserved oligomeric Golgi         | 1.2  |
| IPI00216719 | ERC1 Isoform 1 of ELKS/Rab6-interacting/CAST family member 1             | 0.97 |
| IPI00215888 | SRP72 Signal recognition particle 72 kDa protein                         | 1    |
| IPI00001985 | VPS18 Vacuolar protein sorting-associated protein 18 homolog             | 2.33 |
| IPI00374657 | VAPA Isoform 2 of Vesicle-associated membrane protein-associated protein | 1.92 |
| IPI00873472 | SEC24A Isoform 1 of Protein transport protein Sec24A                     | 0.75 |
| IPI00005737 | SURF4 Isoform 1 of Surfeit locus protein 4                               | 1.27 |
| IPI00001145 | AP4S1 Isoform 1 of AP-4 complex subunit sigma-1                          | 1.7  |
| IPI00149849 | COG4 conserved oligomeric Golgi complex subunit 4 isoform 1              | 0.54 |
| IPI00028005 | NUP107 Nuclear pore complex protein Nup107                               | 1.03 |
| IPI00029730 | STX4 Syntaxin-4                                                          | 1.81 |
| IPI00024976 | TOMM22 Mitochondrial import receptor subunit TOM22 homolog               | 1.62 |
| IPI00073179 | VPS33A Vacuolar protein sorting-associated protein 33A                   | 0.99 |
| IPI00024282 | RAB8B Ras-related protein Rab-8B                                         | 1.57 |
| IPI00062958 | PEX11G Isoform 1 of Peroxisomal membrane protein 11C                     | 1.9  |
| IPI00291928 | RAB14 Ras-related protein Rab-14                                         | 1.18 |
| IPI00290738 | PICALM Isoform 1 of Phosphatidylinositol-binding clathrin assembly       | 0.97 |
| IPI00009253 | NAPA Alpha-soluble NSF attachment protein                                | 1.19 |
| IPI00026848 | LRPAP1 Alpha-2-macroglobulin receptor-associated protein                 | 1.14 |
| IPI00215919 | ARF5 ADP-ribosylation factor 5                                           | 1.02 |
| IPI00090327 | VPS45 Vacuolar protein sorting-associated protein 45                     | 1.14 |
| IPI00059279 | EXOC4 Exocyst complex component 4                                        | 0.9  |
| IPI00414717 | GLG1 Isoform 2 of Golgi apparatus protein 1                              | 1.74 |
| IPI00288941 | NCOA5 Nuclear receptor coactivator 5                                     | 1.37 |
| IPI00021167 | PRKRA Isoform 1 of Interferon-inducible double stranded RNA-dependent    | 1.87 |
| IPI00026940 | NUP50 Isoform 1 of Nuclear pore complex protein Nup50                    | 0.72 |
| IPI00910088 | AP1M1 AP-1 complex subunit mu-1 isoform 1                                | 1.75 |

|             |                                                                      |      |
|-------------|----------------------------------------------------------------------|------|
| IPI01022922 | ARL1 Uncharacterized protein                                         | 1.01 |
| IPI00386755 | ERO1L ERO1-like protein alpha                                        | 1.8  |
| IPI00021978 | PEX11B Peroxisomal membrane protein 11B                              | 1.29 |
| IPI00007309 | TIMM23 Mitochondrial import inner membrane translocase subunit T     | 1.78 |
| IPI00023510 | RAB5A Ras-related protein Rab-5A                                     | 1.2  |
| IPI00550181 | CHMP2B Charged multivesicular body protein 2b                        | 1.12 |
| IPI00220527 | SNX1 Isoform 1A of Sorting nexin-1                                   | 0.88 |
| IPI00014219 | SNX17 Sorting nexin-17                                               | 3.58 |
| IPI00024661 | SEC24C Protein transport protein Sec24C                              | 2.07 |
| IPI00024067 | CLTC Isoform 1 of Clathrin heavy chain 1                             | 1.2  |
| IPI00939304 | IPO5 Isoform 3 of Importin-5                                         | 0.94 |
| IPI00021954 | GBF1 Golgi-specific brefeldin A-resistance guanine nucleotide excha  | 1.04 |
| IPI00177509 | TRAPPC5 Trafficking protein particle complex subunit 5               | 1.16 |
| IPI00003971 | RTN1 Isoform RTN1-A of Reticulon-1                                   | 1.81 |
| IPI01010055 | ANXA11 cDNA FLJ58379, highly similar to Annexin A11                  | 1.38 |
| IPI00306516 | TIMM44 Mitochondrial import inner membrane translocase subunit T     | 1.01 |
| IPI00945633 | SSR1 Uncharacterized protein                                         | 1.01 |
| IPI00013892 | CYTH3 Isoform 1 of Cytohesin-3                                       | 2.71 |
| IPI00002214 | KPNA2 Importin subunit alpha-2                                       | 0.59 |
| IPI00015954 | SAR1A GTP-binding protein SAR1a                                      | 0.98 |
| IPI00017344 | RAB5B Ras-related protein Rab-5B                                     | 1.6  |
| IPI00006176 | HGS Isoform 1 of Hepatocyte growth factor-regulated tyrosine kinase  | 1.17 |
| IPI00855940 | XPO7 Uncharacterized protein                                         | 1.2  |
| IPI00031583 | USO1 Isoform 2 of General vesicular transport factor p115            | 1.13 |
| IPI00008964 | RAB1B Ras-related protein Rab-1B                                     | 1.17 |
| IPI00292753 | GAPVD1 Isoform 6 of GTPase-activating protein and VPS9 domain-c      | 0.93 |
| IPI00016207 | TIMM17A Mitochondrial import inner membrane translocase subunit      | 1.66 |
| IPI00295098 | SRPRB Signal recognition particle receptor subunit beta              | 1.45 |
| IPI01019011 | NUP54 Nucleoporin 54kDa variant (Fragment)                           | 1.04 |
| IPI00002557 | CHD3;LOC732272;SNORA69;COPG2 Coatomer subunit gamma-2                | 1.34 |
| IPI00046057 | STXBP1 Isoform 2 of Syntaxin-binding protein 1                       | 1.61 |
| IPI00185146 | IPO9 Importin-9                                                      | 1.02 |
| IPI00009976 | TMED1 Transmembrane emp24 domain-containing protein 1                | 1.2  |
| IPI00646625 | TAP1 Antigen peptide transporter 1                                   | 5.18 |
| IPI00789155 | CALU calumenin isoform c precurosor                                  | 1.53 |
| IPI00289876 | STX7 Isoform 1 of Syntaxin-7                                         | 1.04 |
| IPI01009057 | SSR4 translocon-associated protein subunit delta isoform 1 precursor | 0.89 |
| IPI00014454 | RIN1 Isoform RIN1 of Ras and Rab interactor 1                        | 1.23 |
| IPI00016676 | TOMM20 Mitochondrial import receptor subunit TOM20 homolog           | 2.14 |
| IPI00218918 | ANXA1 Annexin A1                                                     | 0.96 |
| IPI00031127 | YIPF4 Protein YIPF4                                                  | 1.24 |
| IPI00303292 | KPNA1 Importin subunit alpha-1                                       |      |
| IPI00793199 | ANXA4 annexin A4                                                     | 1.87 |
| IPI00024364 | TNPO1 Isoform 1 of Transportin-1                                     | 0.94 |
| IPI00217151 | C17orf39 Uncharacterized protein C17orf39                            | 0.85 |
| IPI00815770 | SNX3 Isoform 1 of Sorting nexin-3                                    | 1.48 |
| IPI00386862 | ZFYVE19 Isoform 1 of Zinc finger FYVE domain-containing protein      | 0.89 |
| IPI00640703 | XPO5 Exportin-5                                                      | 1.04 |
| IPI00022887 | ERGIC1 Isoform 1 of Endoplasmic reticulum-Golgi intermediate com     | 2.36 |
| IPI00001589 | TIMM13 Mitochondrial import inner membrane translocase subunit T     | 1.49 |
| IPI00465132 | COPE Coatomer subunit epsilon                                        | 1.87 |
| IPI00016513 | RAB10 Ras-related protein Rab-10                                     | 1.2  |
| IPI00006038 | NUP98 Isoform 1 of Nuclear pore complex protein Nup98-Nup96          | 0.94 |
| IPI00854741 | LLGL1 Lethal(2) giant larvae protein homolog 1                       | 2.09 |
| IPI00376195 | ISCA2 Iron-sulfur cluster assembly 2 homolog, mitochondrial          | 1.07 |
| IPI00783982 | COPG Coatomer subunit gamma                                          | 1.33 |
| IPI01021702 | DNM1L 80 kDa protein                                                 | 0.86 |

|             |                                                                      |       |
|-------------|----------------------------------------------------------------------|-------|
| IPI00643591 | AP1G1 cDNA FLJ46199 fis, clone TESTI4007965, highly similar to       | 0.99  |
| IPI00293009 | RABEP1 Isoform 1 of Rab GTPase-binding effector protein 1            | 1.31  |
| IPI00293434 | SRP14 Signal recognition particle 14 kDa protein                     | 0.96  |
| IPI00306382 | SCAMP3 Isoform 1 of Secretory carrier-associated membrane protein    | 1.06  |
| IPI00027009 | PACSN2 Isoform 1 of Protein kinase C and casein kinase substrate ir  | 0.95  |
| IPI00006211 | VAPB Isoform 1 of Vesicle-associated membrane protein-associated p   | 1.45  |
| IPI00289819 | IGF2R Cation-independent mannose-6-phosphate receptor                | 2.59  |
| IPI00549343 | TNFRSF9;VAMP3 Vesicle-associated membrane protein 3                  | 1.95  |
| IPI00305438 | VPS16 Isoform 1 of Vacuolar protein sorting-associated protein 16 ho | 1.47  |
| IPI00015178 | ARFRP1 ADP-ribosylation factor-related protein 1                     | 1.11  |
| IPI00965105 | SEC31A Uncharacterized protein                                       | 1.18  |
| IPI00015842 | RCN1 Reticulocalbin-1                                                | 2.12  |
| IPI00922006 | AP1S2 AP-1 complex subunit sigma-2                                   | 0.99  |
| IPI01021644 | RAB5C Uncharacterized protein                                        | 1.59  |
| IPI00871742 | DNM1L Isoform 6 of Dynamin-1-like protein                            | 1.7   |
| IPI00974545 | ARL6 Isoform 2 of ADP-ribosylation factor-like protein 6             | 1.25  |
| IPI00916570 | SCAMP4 Protein                                                       | 2.61  |
| IPI00001883 | SNX9 Sorting nexin-9                                                 | 2.56  |
| IPI00220609 | SEH1L Isoform B of Nucleoporin SEH1                                  | 1.26  |
| IPI00016891 | RAB6B Ras-related protein Rab-6B                                     | 2.63  |
| IPI00513853 | STX12 Uncharacterized protein                                        | 1.04  |
| IPI00001541 | TIMM9 Mitochondrial import inner membrane translocase subunit Ti     | 1.01  |
| IPI00480056 | RAB4A RAB4A, member RAS oncogene family variant                      | 0.93  |
| IPI00032459 | AP3M1 AP-3 complex subunit mu-1                                      | 0.92  |
| IPI00299095 | SNX2 Sorting nexin-2                                                 | 1.07  |
| IPI00008569 | YKT6 Synaptobrevin homolog YKT6                                      | 0.98  |
| IPI00642816 | SRP9 Isoform 1 of Signal recognition particle 9 kDa protein          | 2.13  |
| IPI00024348 | PEX13 Peroxisomal membrane protein PEX13                             | 1.46  |
| IPI00909772 | AP2M1 cDNA FLJ53069, highly similar to AP-2 complex subunit mu       | 0.99  |
| IPI00014301 | OXA1L Oxidase (Cytochrome c) assembly 1-like                         | 1.01  |
| IPI00023526 | RAB6A Isoform 1 of Ras-related protein Rab-6A                        | 0.95  |
| IPI00004324 | TRAPPC3 Trafficking protein particle complex subunit 3               | 1.17  |
| IPI00164251 | MOSPD1 Isoform 3 of Motile sperm domain-containing protein 1         | 3.65  |
| IPI00014053 | TOMM40 Isoform 1 of Mitochondrial import receptor subunit TOM40      | 2.66  |
| IPI00784366 | AP2B1 Isoform 2 of AP-2 complex subunit beta                         | 1.07  |
| IPI00168388 | SRP68 Isoform 1 of Signal recognition particle 68 kDa protein        | 0.99  |
| IPI00414127 | RANBP1 Ran-specific GTPase-activating protein                        | 1.74  |
| IPI00514550 | DNM2 dynamin-2 isoform 2                                             | 1.13  |
| IPI00024095 | ANXA3 Annexin A3                                                     | 1.28  |
| IPI00016932 | INPPL1 Isoform 1 of Phosphatidylinositol-3,4,5-trisphosphate 5-phos  | 1.64  |
| IPI00020887 | VAMP7 Isoform 1 of Vesicle-associated membrane protein 7             | 1.1   |
| IPI00002186 | ARFGEF2 Brefeldin A-inhibited guanine nucleotide-exchange protei     | 1.93  |
| IPI00004416 | CHMP2A Charged multivesicular body protein 2a                        | 1.42  |
| IPI00413140 | DNM1 Isoform 1 of Dynamin-1                                          | 1.74  |
| IPI00000001 | STAU1 Isoform Long of Double-stranded RNA-binding protein Stauf      | 1.69  |
| IPI00981087 | SEC24B Uncharacterized protein                                       | 2.14  |
| IPI00028481 | RAB8A Ras-related protein Rab-8A                                     | 1.02  |
| IPI00384047 | TRAPPC6B Isoform 1 of Trafficking protein particle complex subunit   | 1.13  |
| IPI00300299 | SPCS3 Signal peptidase complex subunit 3                             | 1.68  |
| IPI00221226 | ANXA6 Annexin A6                                                     | 0.94  |
| IPI00010491 | RAB27B Ras-related protein Rab-27B                                   | 1.95  |
| IPI00027194 | STX18 Syntaxin-18                                                    | 4.49  |
| IPI00216965 | GOSR2 Isoform B of Golgi SNAP receptor complex member 2              | 0.97  |
| IPI00018415 | TM9SF2 Transmembrane 9 superfamily member 2                          | 2.73  |
| IPI00001538 | FXC1 Mitochondrial import inner membrane translocase subunit Tim     | 1.77  |
| IPI00017376 | SEC23B Protein transport protein Sec23B                              | 1.49  |
| IPI00964886 | TIMM8B mitochondrial import inner membrane translocase subunit       | 10.62 |

|             |                                                                      |       |
|-------------|----------------------------------------------------------------------|-------|
| IPI00304577 | AP2A1 Isoform A of AP-2 complex subunit alpha-1                      | 1.12  |
| IPI00292134 | EPS15 Isoform 1 of Epidermal growth factor receptor substrate 15     | 2.13  |
| IPI00296259 | TMED4 Isoform 1 of Transmembrane emp24 domain-containing prot        | 1.28  |
| IPI00790214 | RCN2 Uncharacterized protein                                         | 2.79  |
| IPI00007909 | RABAC1 Prenylated Rab acceptor protein 1                             | 3.48  |
| IPI00556553 | ABCB7 Isoform 2 of ATP-binding cassette sub-family B member 7, m     | 0.91  |
| IPI00646493 | COPA Isoform 2 of Coatomer subunit alpha                             | 1.07  |
| IPI00215914 | ARF1 ADP-ribosylation factor 1                                       | 1.06  |
| IPI00023530 | CDK5 Cyclin-dependent kinase 5                                       | 1.1   |
| IPI00218337 | LMAN2L Isoform 2 of VIP36-like protein                               | 1.42  |
| IPI00029403 | SNX4 Sorting nexin-4                                                 | 1.87  |
| IPI00329801 | ANXA5 Annexin A5                                                     | 1.13  |
| IPI00165261 | SCFD1 Sec1 family domain-containing protein 1                        | 1.07  |
| IPI00001639 | KPNB1 Importin subunit beta-1                                        | 1.01  |
| IPI00014589 | CLTB Isoform Brain of Clathrin light chain B                         | 1.05  |
| IPI00027178 | AP1G2 AP-1 complex subunit gamma-like 2                              | 0.89  |
| IPI00018931 | VPS35 Vacuolar protein sorting-associated protein 35                 | 1.18  |
| IPI00028946 | RTN3 Isoform 3 of Reticulon-3                                        | 1.15  |
| IPI00024705 | GIPC1 PDZ domain-containing protein GIPC1                            | 1.56  |
| IPI00016621 | AP2A2 Isoform 2 of AP-2 complex subunit alpha-2                      | 1.01  |
| IPI00798193 | SNX24 Uncharacterized protein                                        | 1.09  |
| IPI00853598 | SEC13 cDNA FLJ56334, highly similar to SEC13-related protein         | 1.04  |
| IPI00063784 | VTI1B Isoform Long of Vesicle transport through interaction with t-S | 1.06  |
| IPI00220219 | COPB2 Coatomer subunit beta'                                         | 1.17  |
| IPI00015602 | TOMM70A Mitochondrial import receptor subunit TOM70                  | 1.22  |
| IPI00438170 | SNX12 Isoform 1 of Sorting nexin-12                                  | 1.34  |
| IPI00100796 | CHMP5 Charged multivesicular body protein 5                          | 1.04  |
| IPI00924549 | BET1 Protein                                                         | 0.92  |
| IPI00009901 | NUTF2 Nuclear transport factor 2                                     | 1.54  |
| IPI00297626 | STXBP3 Syntaxin-binding protein 3                                    | 2.05  |
| IPI00012578 | KPNA4 Importin subunit alpha-4                                       | 1.96  |
| IPI00748807 | NUP160 Isoform 1 of Nuclear pore complex protein Nup160              | 1.34  |
| IPI00025346 | PEX14 Isoform 1 of Peroxisomal membrane protein PEX14                | 1.12  |
| IPI00028055 | TMED10 Transmembrane emp24 domain-containing protein 10              | 1.29  |
| IPI00031169 | RAB2A Ras-related protein Rab-2A                                     | 0.93  |
| IPI00016608 | TMED2 Transmembrane emp24 domain-containing protein 2                | 1.13  |
| IPI00002188 | ARFGEF1 Brefeldin A-inhibited guanine nucleotide-exchange proteir    | 1.59  |
| IPI00005129 | SCAMP1 Isoform 1 of Secretory carrier-associated membrane protein 1  |       |
| IPI00441867 | PEX19 Isoform 1 of Peroxisomal biogenesis factor 19                  | 26.68 |
| IPI00023504 | RAB3A Ras-related protein Rab-3A                                     | 0.75  |
| IPI00418169 | ANXA2 Isoform 2 of Annexin A2                                        | 0.94  |
| IPI00646963 | REEP6 Uncharacterized protein                                        | 1.25  |
| IPI00001738 | NUP88 Nuclear pore complex protein Nup88                             | 2.14  |
| IPI00001676 | NPLOC4 Isoform 2 of Nuclear protein localization protein 4 homolog   | 0.84  |
| IPI00166132 | VPS52 Vacuolar protein sorting-associated protein 52 homolog         | 0.98  |
| IPI00024684 | MX2 Interferon-induced GTP-binding protein Mx2                       | 9.64  |
| IPI00026530 | LMAN1 Protein ERGIC-53                                               | 1.34  |
| IPI00218288 | SEC24D Isoform 2 of Protein transport protein Sec24D                 | 0.52  |

---

**KOG category [O] Posttranslational modification, protein turnover, chaperones**

---

|             |                                                                 |      |
|-------------|-----------------------------------------------------------------|------|
| IPI00017334 | PHB Prohibitin                                                  | 1.21 |
| IPI00165949 | ERAP1 Isoform 2 of Endoplasmic reticulum aminopeptidase 1       | 2.57 |
| IPI00219622 | PSMA2 Proteasome subunit alpha type-2                           | 1.34 |
| IPI00007765 | HSPA9 Stress-70 protein, mitochondrial                          | 1.25 |
| IPI00025156 | STUB1 Isoform 1 of E3 ubiquitin-protein ligase CHIP             | 1.12 |
| IPI00022543 | PIGK GPI-anchor transamidase                                    | 1.01 |
| IPI00024502 | UBQLN4 Isoform 1 of Ubiquilin-4                                 | 1.94 |
| IPI00383581 | GANAB cDNA FLJ61290, highly similar to Neutral alpha-glucosidas | 8.3  |



|             |                                                                      |      |
|-------------|----------------------------------------------------------------------|------|
| IPI00784090 | CCT8 T-complex protein 1 subunit theta                               | 0.9  |
| IPI00012060 | UBE2B Ubiquitin-conjugating enzyme E2 B                              | 5.2  |
| IPI00021370 | UBE2K Isoform 1 of Ubiquitin-conjugating enzyme E2 K                 | 1.07 |
| IPI00414289 | GPS1 Isoform 2 of COP9 signalosome complex subunit 1                 | 1    |
| IPI00010154 | GDI1 Rab GDP dissociation inhibitor alpha                            | 2.4  |
| IPI00011229 | CTSD Cathepsin D                                                     | 2.14 |
| IPI00002535 | FKBP2 Peptidyl-prolyl cis-trans isomerase FKBP2                      | 2.19 |
| IPI00011250 | UCHL3 Ubiquitin carboxyl-terminal hydrolase isozyme L3               | 1.33 |
| IPI00166749 | PMPCA Mitochondrial-processing peptidase subunit alpha               | 1.02 |
| IPI00003865 | HSPA8 Isoform 1 of Heat shock cognate 71 kDa protein                 | 0.76 |
| IPI00479722 | PSME1 Proteasome activator complex subunit 1                         | 1.52 |
| IPI00646350 | NAE1 Uncharacterized protein                                         | 1.62 |
| IPI00011937 | PRDX4 Peroxiredoxin-4                                                | 2.61 |
| IPI00292499 | HSPA14 Heat shock 70 kDa protein 14                                  | 2.02 |
| IPI00301419 | COPS7A COP9 signalosome complex subunit 7a                           | 0.86 |
| IPI00375380 | PSMD13 Isoform 2 of 26S proteasome non-ATPase regulatory subunit 13  | 0.86 |
| IPI00007343 | RNF113A RING finger protein 113A                                     | 1.76 |
| IPI00294834 | ASPH Isoform 1 of Aspartyl/asparaginyl beta-hydroxylase              | 1.22 |
| IPI00023919 | PSMC5 26S protease regulatory subunit 8                              | 0.92 |
| IPI00910610 | UBE2F Isoform 2 of NEDD8-conjugating enzyme UBE2F                    | 2.13 |
| IPI00220373 | IDE Insulin-degrading enzyme                                         | 0.73 |
| IPI00465308 | PIGS Isoform 1 of GPI transamidase component PIG-S                   | 1.28 |
| IPI00302927 | CCT4 T-complex protein 1 subunit delta                               | 0.87 |
| IPI00927892 | PMPCB Mitochondrial-processing peptidase subunit beta                | 0.9  |
| IPI00303300 | FKBP10 Peptidyl-prolyl cis-trans isomerase FKBP10                    | 1.57 |
| IPI00006197 | NVL Isoform 1 of Nuclear valosin-containing protein-like             | 1.1  |
| IPI00943181 | PSME2 Uncharacterized protein                                        | 1.19 |
| IPI00022597 | UBE2M NEDD8-conjugating enzyme Ubc12                                 | 1.03 |
| IPI00219913 | USP14 Ubiquitin carboxyl-terminal hydrolase 14                       | 1.68 |
| IPI00029472 | ATE1 Isoform ATE1-1 of Arginyl-tRNA--protein transferase 1           | 2.12 |
| IPI00221012 | USP9X Isoform 1 of Probable ubiquitin carboxyl-terminal hydrolase F  | 1.07 |
| IPI00026813 | FNTA Farnesyltransferase, CAAX box, alpha, isoform CRA_a             | 0.98 |
| IPI00642329 | MFN2 Isoform 1 of Mitofusin-2                                        | 1.52 |
| IPI00429633 | ERO1LB ERO1-like protein beta                                        | 1.2  |
| IPI00746451 | UBE2A Ubiquitin-conjugating enzyme E2 A                              | 1    |
| IPI00305626 | ASPHD1 Aspartate beta-hydroxylase domain-containing protein 1        | 5.51 |
| IPI00926648 | APEH Uncharacterized protein                                         | 1.42 |
| IPI00025019 | PSMB1 Proteasome subunit beta type-1                                 | 1    |
| IPI00030144 | PPIAL4C;PPIAL4G;PPIAL4B;PPIAL4A Peptidylprolyl cis-trans isomerase 4 | 0.84 |
| IPI00009301 | COPS7B Isoform 1 of COP9 signalosome complex subunit 7b              | 1.5  |
| IPI00006475 | UBE2D4 Ubiquitin-conjugating enzyme E2 D4                            | 1.29 |
| IPI00290566 | TCP1 T-complex protein 1 subunit alpha                               | 1.11 |
| IPI00294610 | DNAJA3 Isoform 1 of DnaJ homolog subfamily A member 3, mitochondrial | 1.15 |
| IPI00219077 | LTA4H Isoform 1 of Leukotriene A-4 hydrolase                         | 1.39 |
| IPI00009949 | PSMF1 Proteasome inhibitor PI31 subunit                              | 1.88 |
| IPI00011285 | CAPN1 Calpain-1 catalytic subunit                                    | 1.18 |
| IPI00216318 | YWHAB Isoform Long of 14-3-3 protein beta/alpha                      | 1.03 |
| IPI00000051 | PFDN1 Prefoldin subunit 1                                            | 0.88 |
| IPI00304306 | DNAJC19 Mitochondrial import inner membrane translocase subunit 19   | 1.53 |
| IPI00643152 | HSPA1L cDNA FLJ56386, highly similar to Heat shock 70 kDa protein 1  | 1.77 |
| IPI00966770 | COPS4 Uncharacterized protein                                        | 0.88 |
| IPI00018813 | COPS2 Isoform 2 of COP9 signalosome complex subunit 2                | 0.85 |
| IPI00000877 | HYOU1 Hypoxia up-regulated protein 1                                 | 1.8  |
| IPI00641330 | RING1 Isoform 1 of E3 ubiquitin-protein ligase RING1                 | 1.26 |
| IPI00028957 | UBE4A Isoform 2 of Ubiquitin conjugation factor E4 A                 | 1.75 |
| IPI00017799 | TXN2 cDNA FLJ55158, highly similar to Thioredoxin, mitochondrial     | 0.69 |
| IPI00013328 | TUSC3 Isoform 1 of Tumor suppressor candidate 3                      | 1.49 |

|             |                                                                     |      |
|-------------|---------------------------------------------------------------------|------|
| IPI00423874 | AMFR E3 ubiquitin-protein ligase AMFR                               |      |
| IPI00219005 | FKBP4 Peptidyl-prolyl cis-trans isomerase FKBP4                     | 1.08 |
| IPI00020042 | PSMC4 Isoform 1 of 26S protease regulatory subunit 6B               | 0.9  |
| IPI00010860 | PSMD9 Isoform p27-L of 26S proteasome non-ATPase regulatory sub     | 0.96 |
| IPI00002745 | CTSZ Cathepsin Z                                                    | 0.65 |
| IPI00008247 | ANAPC5 Isoform 1 of Anaphase-promoting complex subunit 5            | 0.71 |
| IPI00019927 | PSMD7 26S proteasome non-ATPase regulatory subunit 7                | 1.17 |
| IPI00295741 | CTSB Cathepsin B                                                    | 2.87 |
| IPI00219445 | PSME3 Isoform 2 of Proteasome activator complex subunit 3           | 0.67 |
| IPI00939720 | BIRC6 Baculoviral IAP repeat-containing protein 6                   | 1.09 |
| IPI00759832 | YWHAB Isoform Short of 14-3-3 protein beta/alpha                    | 0.91 |
| IPI00514593 | TTC4 Uncharacterized protein                                        | 0.6  |
| IPI00021435 | PSMC2 26S protease regulatory subunit 7                             | 0.99 |
| IPI00032826 | ST13 Hsc70-interacting protein                                      | 0.96 |
| IPI00293073 | MFN1 Mitochondrial transmembrane GTPase FZO-2                       | 2.24 |
| IPI00024129 | PPIC Peptidyl-prolyl cis-trans isomerase C                          | 1.26 |
| IPI00966303 | ANAPC4 Uncharacterized protein                                      | 0.53 |
| IPI00005745 | SPTLC1 Serine palmitoyltransferase 1                                | 2.16 |
| IPI00985090 | CUL2 cullin-2 isoform a                                             | 1.07 |
| IPI00022774 | VCP Transitional endoplasmic reticulum ATPase                       | 1    |
| IPI00216319 | YWHAH 14-3-3 protein eta                                            | 0.92 |
| IPI00022348 | PML Isoform PML-1 of Protein PML                                    | 4.24 |
| IPI00003870 | CLPP Putative ATP-dependent Clp protease proteolytic subunit, mitoc | 0.96 |
| IPI00003386 | RBX1 E3 ubiquitin-protein ligase RBX1                               | 1.62 |
| IPI00099550 | UBQLN1 Isoform 1 of Ubiquilin-1                                     | 1.01 |
| IPI00006377 | POMP Proteasome maturation protein                                  | 1.93 |
| IPI00002134 | PSMD5 26S proteasome non-ATPase regulatory subunit 5                | 1.69 |
| IPI00031461 | GDI2 cDNA FLJ60299, highly similar to Rab GDP dissociation inhib    | 1.21 |
| IPI00297779 | CCT2 T-complex protein 1 subunit beta                               | 0.84 |
| IPI00339269 | HSPA6 Heat shock 70 kDa protein 6                                   | 0.93 |
| IPI00185374 | PSMD12 26S proteasome non-ATPase regulatory subunit 12              | 0.93 |
| IPI00013002 | UBE2C Ubiquitin-conjugating enzyme E2 C                             | 0.99 |
| IPI00216919 | YAP1 Isoform 1 of Yorkie homolog                                    | 1.79 |
| IPI00221224 | ANPEP Aminopeptidase N                                              | 1.67 |
| IPI00030275 | TRAP1 Heat shock protein 75 kDa, mitochondrial                      | 0.95 |
| IPI00385987 | DAGLB Isoform 1 of Sn1-specific diacylglycerol lipase beta          | 1.2  |
| IPI00246975 | GSTM3 Glutathione S-transferase Mu 3                                | 1.2  |
| IPI00012608 | RNF5 E3 ubiquitin-protein ligase RNF5                               | 3.63 |
| IPI00549761 | ALG1 Chitobiosyldiphosphodolichol beta-mannosyltransferase          | 1.89 |
| IPI00003949 | UBE2N Ubiquitin-conjugating enzyme E2 N                             | 1.75 |
| IPI00241860 | MIPEP Mitochondrial intermediate peptidase                          | 1.27 |
| IPI00025721 | COPS3 COP9 signalosome complex subunit 3                            | 0.78 |
| IPI00742872 | RNF170 Isoform 1 of RING finger protein 170                         | 2.94 |
| IPI00911039 | HSPA1B;HSPA1A cDNA FLJ54408, highly similar to Heat shock 70        | 1    |
| IPI00982304 | PSMC3 Uncharacterized protein                                       | 1.07 |
| IPI00299608 | PSMD1 Isoform 1 of 26S proteasome non-ATPase regulatory subunit 1   | 1    |
| IPI00304925 | HSPA1B;HSPA1A Heat shock 70 kDa protein 1A/1B                       | 1.35 |
| IPI00100030 | PIGT Isoform 1 of GPI transamidase component PIG-T                  | 1.19 |
| IPI00011454 | GANAB Isoform 2 of Neutral alpha-glucosidase AB                     | 2.31 |
| IPI00010796 | P4HB Protein disulfide-isomerase                                    | 1.57 |
| IPI00009480 | COPS8 COP9 signalosome complex subunit 8                            | 1.24 |
| IPI00014171 | HERPUD1 Isoform 1 of Homocysteine-responsive endoplasmic reticul    | 8.17 |
| IPI00220642 | YWHAG 14-3-3 protein gamma                                          | 1.13 |
| IPI00305692 | TXNL1 Thioredoxin-like protein 1                                    | 1.76 |
| IPI00218466 | SEC61A1 cDNA FLJ59739, highly similar to Protein transport protei   | 4.71 |
| IPI00830108 | DNAJC2 Isoform 1 of DnaJ homolog subfamily C member 2               | 0.78 |
| IPI00000787 | PSMB9 Isoform LMP2.L of Proteasome subunit beta type-9              | 2.1  |

|             |                                                                     |      |
|-------------|---------------------------------------------------------------------|------|
| IPI00018352 | UCHL1 Ubiquitin carboxyl-terminal hydrolase isozyme L1              | 1.29 |
| IPI00465290 | DNAJC11 Isoform 1 of DnaJ homolog subfamily C member 11             | 1.57 |
| IPI00553185 | CCT3 T-complex protein 1 subunit gamma                              | 0.92 |
| IPI00955965 | USP10 Isoform 2 of Ubiquitin carboxyl-terminal hydrolase 10         | 1.79 |
| IPI00024175 | PSMA7 Isoform 1 of Proteasome subunit alpha type-7                  | 1.03 |
| IPI00784154 | HSPD1 60 kDa heat shock protein, mitochondrial                      | 0.99 |
| IPI00000783 | PSMB8 Isoform 1 of Proteasome subunit beta type-8                   | 1.87 |
| IPI00032406 | DNAJA2 DnaJ homolog subfamily A member 2                            | 0.95 |
| IPI00642374 | UCHL5 Ubiquitin carboxyl-terminal hydrolase L5                      | 1.21 |
| IPI00302673 | ATPAF1 ATP synthase mitochondrial F1 complex assembly factor 1 i    | 1.01 |
| IPI00642862 | PPIL4 Peptidyl-prolyl cis-trans isomerase-like 4                    | 1    |
| IPI00218775 | FKBP5 Peptidyl-prolyl cis-trans isomerase FKBP5                     | 2.41 |
| IPI00895911 | CNBP cellular nucleic acid-binding protein isoform 2                | 0.83 |
| IPI00009958 | COPS5 COP9 signalosome complex subunit 5                            | 0.84 |
| IPI00328154 | UBA3 Isoform 1 of NEDD8-activating enzyme E1 catalytic subunit      | 1.35 |
| IPI00003217 | PSMB7 Proteasome subunit beta type-7                                | 3.06 |
| IPI00185919 | LARP1 Isoform 1 of La-related protein 1                             | 1    |
| IPI00015891 | PFDN4 Prefoldin subunit 4                                           | 0.98 |
| IPI00020008 | NEDD8 NEDD8                                                         | 0.99 |
| IPI00010252 | TRIM33 Isoform Alpha of E3 ubiquitin-protein ligase TRIM33          | 0.99 |
| IPI00011603 | PSMD3 26S proteasome non-ATPase regulatory subunit 3                | 0.88 |
| IPI00025252 | PDIA3 Protein disulfide-isomerase A3                                | 1.77 |
| IPI00025874 | RPN1 Dolichyl-diphosphooligosaccharide--protein glycosyltransferase | 1.52 |
| IPI00003438 | DNAJC8 DnaJ homolog subfamily C member 8                            | 1.2  |
| IPI00299155 | PSMA4 Proteasome subunit alpha type-4                               | 0.89 |
| IPI00299149 | LOC728825;SUMO2 Small ubiquitin-related modifier 2                  | 0.98 |
| IPI00019600 | UBE2V2 Ubiquitin-conjugating enzyme E2 variant 2                    | 4.72 |
| IPI00013847 | UQCRC1 Cytochrome b-c1 complex subunit 1, mitochondrial             | 1.25 |
| IPI00163230 | COPS6 COP9 signalosome complex subunit 6                            | 1.03 |
| IPI00024523 | DNAJB6 Isoform A of DnaJ homolog subfamily B member 6               | 4.34 |
| IPI00293260 | DNAJC10 Isoform 1 of DnaJ homolog subfamily C member 10             | 1.49 |
| IPI00027230 | HSP90B1 Endoplasmic reticulum chaperone                             | 1.25 |
| IPI00789101 | PTGES3 cDNA FLJ40895 fis, clone UTERU2002294, highly similar to     | 1.02 |
| IPI00009407 | DAD1 Dolichyl-diphosphooligosaccharide--protein glycosyltransferase | 1.28 |
| IPI00296374 | ZFPL1 Zinc finger protein-like 1                                    | 1.72 |
| IPI00024821 | PSMD14 26S proteasome non-ATPase regulatory subunit 14              | 1.34 |
| IPI00289758 | CAPN2 Calpain-2 catalytic subunit                                   | 1.05 |
| IPI00295394 | COX11 Cytochrome c oxidase assembly protein COX11, mitochondrial    | 0.8  |
| IPI00002966 | HSPA4 Heat shock 70 kDa protein 4                                   | 1.04 |
| IPI00018971 | TRIM21 Isoform 1 of E3 ubiquitin-protein ligase TRIM21              | 3.69 |
| IPI00023647 | UBA6 Isoform 1 of Ubiquitin-like modifier-activating enzyme 6       | 1.05 |
| IPI00152695 | WDR82 WD repeat-containing protein 82                               | 0.98 |
| IPI00008821 | HERC5 E3 ISG15--protein ligase HERC5                                | 3.02 |
| IPI00216298 | TXN Thioredoxin                                                     | 1.15 |
| IPI00026848 | LRPAP1 Alpha-2-macroglobulin receptor-associated protein            | 1.14 |
| IPI00015361 | PFDN5 Prefoldin subunit 5                                           | 0.91 |
| IPI00029629 | TRIM25 E3 ubiquitin/ISG15 ligase TRIM25                             | 1.04 |
| IPI00006298 | PPIG Isoform 1 of Peptidyl-prolyl cis-trans isomerase G             | 2.41 |
| IPI00008454 | DNAJB11 DnaJ homolog subfamily B member 11                          | 2.21 |
| IPI00396203 | TBCD Isoform 1 of Tubulin-specific chaperone D                      | 0.79 |
| IPI00031479 | PDIA5 Protein disulfide-isomerase A5                                | 2.59 |
| IPI00299299 | HSPA13 Heat shock 70 kDa protein 13                                 | 1.14 |
| IPI00000816 | YWHAE Isoform 1 of 14-3-3 protein epsilon                           | 0.94 |
| IPI01014546 | PRMT1 protein arginine N-methyltransferase 1 isoform 1              | 0.86 |
| IPI00386755 | ERO1L ERO1-like protein alpha                                       | 1.8  |
| IPI00001914 | FKBP7 Isoform 1 of Peptidyl-prolyl cis-trans isomerase FKBP7        | 1.15 |
| IPI00030371 | TRIM4 Isoform Alpha of Tripartite motif-containing protein 4        | 0.8  |

|             |                                                                    |      |
|-------------|--------------------------------------------------------------------|------|
| IPI01015191 | AFG3L2 Similar to AFG3 ATPase family gene 3-like 2 (Fragment)      | 1.67 |
| IPI00149650 | PPWD1 Peptidylprolyl isomerase domain and WD repeat-containing p   | 0.91 |
| IPI00018146 | YWHAQ 14-3-3 protein theta                                         | 0.88 |
| IPI00741097 | GSTT1 Glutathione S-transferase theta-1                            | 1.37 |
| IPI00472498 | TMEM189;UBE2V1;TMEM189-UBE2V1 Isoform 3 of Ubiquitin-con           | 1.07 |
| IPI00749013 | UBE2D3 Isoform 2 of Ubiquitin-conjugating enzyme E2 D3             | 1.16 |
| IPI00000728 | USP15 Isoform 1 of Ubiquitin carboxyl-terminal hydrolase 15        | 1.19 |
| IPI00927606 | GPX1 Glutathione peroxidase 1                                      | 7.09 |
| IPI00295849 | RABGGTB Geranylgeranyl transferase type-2 subunit beta             | 0.65 |
| IPI00297113 | TRIM32 E3 ubiquitin-protein ligase TRIM32                          | 1.26 |
| IPI00012426 | SCPEP1 Isoform 1 of Retinoid-inducible serine carboxypeptidase     | 0.62 |
| IPI00014877 | QPCTL Glutaminyl-peptide cyclotransferase-like protein             | 2.19 |
| IPI00479306 | PSMB5 Isoform 1 of Proteasome subunit beta type-5                  | 0.82 |
| IPI00021594 | GPAA1 Isoform 1 of Glycosylphosphatidylinositol anchor attachment  | 1.29 |
| IPI00023087 | UBE2T Ubiquitin-conjugating enzyme E2 T                            | 0.26 |
| IPI00029557 | GRPEL1 GrpE protein homolog 1, mitochondrial                       | 1.07 |
| IPI00171525 | SEN3 Sentrin-specific protease 3                                   | 0.98 |
| IPI00219783 | UBE2G1 Ubiquitin-conjugating enzyme E2 G1                          | 0.58 |
| IPI00419249 | PSMA3 Isoform 1 of Proteasome subunit alpha type-3                 | 0.81 |
| IPI00014340 | PPP1R12C Isoform 1 of Protein phosphatase 1 regulatory subunit 12C | 1.35 |
| IPI00003362 | HSPA5 78 kDa glucose-regulated protein                             | 1.46 |
| IPI00026519 | PPIF Peptidyl-prolyl cis-trans isomerase F, mitochondrial          | 0.95 |
| IPI00000874 | PRDX1 Peroxiredoxin-1                                              | 1.45 |
| IPI00465432 | NOMO2 Isoform 1 of Nodal modulator 2                               | 2.21 |
| IPI00162563 | RNF40 Isoform 1 of E3 ubiquitin-protein ligase BRE1B               | 0.77 |
| IPI00012268 | PSMD2 26S proteasome non-ATPase regulatory subunit 2               | 1.11 |
| IPI00293126 | TBCB Tubulin-folding cofactor B                                    | 1.19 |
| IPI00402231 | DNAJC5 Isoform 1 of DnaJ homolog subfamily C member 5              | 2.44 |
| IPI00003765 | CAPN7 Calpain-7                                                    | 0.1  |
| IPI00009904 | PDIA4 Protein disulfide-isomerase A4                               | 1.95 |
| IPI01012733 | HSPA4L Uncharacterized protein                                     | 1.47 |
| IPI00015947 | DNAJB1 DnaJ homolog subfamily B member 1                           | 1.49 |
| IPI00030915 | USP8 Ubiquitin carboxyl-terminal hydrolase 8                       | 0.31 |
| IPI00031755 | RCE1 CAAX prenyl protease 2                                        | 3.58 |
| IPI00003894 | RNF11 RING finger protein 11                                       | 2.67 |
| IPI00013723 | PIN1 Peptidyl-prolyl cis-trans isomerase NIMA-interacting 1        | 0.8  |
| IPI00028006 | PSMB2 Proteasome subunit beta type-2                               | 1.06 |
| IPI00028004 | PSMB3 Proteasome subunit beta type-3                               | 0.93 |
| IPI00411356 | VPS4A Vacuolar protein sorting-associated protein 4A               | 2.46 |
| IPI00074870 | DNAJC1 DnaJ homolog subfamily C member 1                           | 2.23 |
| IPI00019755 | GSTO1 Glutathione S-transferase omega-1                            | 1.55 |
| IPI00026216 | NPEPPS Puromycin-sensitive aminopeptidase                          | 1.33 |
| IPI00219757 | GSTP1 Glutathione S-transferase P                                  | 1.39 |
| IPI00220835 | SEC61B Protein transport protein Sec61 subunit beta                | 2.83 |
| IPI00642211 | RNPEP Aminopeptidase B                                             | 1.89 |
| IPI00297492 | STT3A Dolichyl-diphosphooligosaccharide--protein glycosyltransfera | 2.09 |
| IPI00011126 | PSMC1 26S protease regulatory subunit 4                            | 1.44 |
| IPI00655754 | UFD1L Isoform Long of Ubiquitin fusion degradation protein 1 homo  | 1.07 |
| IPI00005822 | CDC23 Isoform 1 of Cell division cycle protein 23 homolog          | 1.63 |
| IPI00939471 | BRCC3 Isoform 2 of Lys-63-specific deubiquitinase BRCC36           | 0.98 |
| IPI00297084 | DDOST Dolichyl-diphosphooligosaccharide--protein glycosyltransfer  | 1.17 |
| IPI00382470 | HSP90AA1 Isoform 2 of Heat shock protein HSP 90-alpha              | 0.98 |
| IPI00024915 | PRDX5 Isoform Mitochondrial of Peroxiredoxin-5, mitochondrial      | 2.81 |
| IPI00024157 | FKBP3 Peptidyl-prolyl cis-trans isomerase FKBP3                    | 1.19 |
| IPI00399307 | PRCP lysosomal Pro-X carboxypeptidase isoform 2 preproprotein      | 1.67 |
| IPI00086909 | Similar to 14-3-3 protein epsilon                                  | 0.82 |
| IPI00056504 | UBE2E3 Ubiquitin-conjugating enzyme E2 E3                          | 1.2  |

|             |                                                                        |       |
|-------------|------------------------------------------------------------------------|-------|
| IPI00022462 | TFRC Transferrin receptor protein 1                                    | 1.74  |
| IPI00022664 | RABGGTA Geranylgeranyl transferase type-2 subunit alpha                | 0.91  |
| IPI00923547 | 60 kDa chaperonin (Fragment)                                           | 1.26  |
| IPI00020984 | CANX cDNA FLJ55574, highly similar to Calnexin                         | 2.02  |
| IPI00640525 | CTSA lysosomal protective protein isoform a precursor                  | 0.73  |
| IPI00449049 | PARP1 Poly [ADP-ribose] polymerase 1                                   | 1.06  |
| IPI00026991 | GALNT6 Polypeptide N-acetylgalactosaminyltransferase 6                 | 2.11  |
| IPI00022759 | PGGT1B Isoform 1 of Geranylgeranyl transferase type-1 subunit beta     | 1.41  |
| IPI00787827 | PITRM1 Isoform 2 of Presequence protease, mitochondrial                | 1.45  |
| IPI00438229 | TRIM28 Isoform 1 of Transcription intermediary factor 1-beta           | 0.88  |
| IPI00022386 | TXNDC9 Thioredoxin domain-containing protein 9                         | 0.78  |
| IPI00472442 | PSMA1 Isoform Long of Proteasome subunit alpha type-1                  | 0.95  |
| IPI00414676 | HSP90AB1 Heat shock protein HSP 90-beta                                | 0.76  |
| IPI00291922 | PSMA5 Proteasome subunit alpha type-5                                  | 0.92  |
| IPI00435433 | RNF185 Isoform 1 of RING finger protein 185                            | 5.01  |
| IPI00419869 | COX15 Isoform 1 of Cytochrome c oxidase assembly protein COX15         | 1.07  |
| IPI00182728 | VPS4B Vacuolar protein sorting-associated protein 4B                   | 1.15  |
| IPI00005657 | PFDN6 Prefoldin subunit 6                                              | 0.96  |
| IPI00307017 | LNPEP Isoform 1 of Leucyl-cystinyl aminopeptidase                      | 2.45  |
| IPI00549672 | PSMD13 HSPC027                                                         | 0.88  |
| IPI00006451 | NSF Vesicle-fusing ATPase                                              | 0.93  |
| IPI00003588 | EEF1E1 Eukaryotic translation elongation factor 1 epsilon-1            | 1.03  |
| IPI00465261 | ERAP2 Isoform 1 of Endoplasmic reticulum aminopeptidase 2              | 1.86  |
| IPI00020539 | PGPEP1 Pyroglutamyl-peptidase 1                                        | 4.58  |
| IPI00555956 | PSMB4 Proteasome subunit beta type-4                                   | 1.66  |
| IPI00023234 | UBA2 SUMO-activating enzyme subunit 2                                  | 1.18  |
| IPI00301202 | MAGT1 magnesium transporter protein 1                                  | 1.29  |
| IPI00549666 | GRPEL2 GrpE protein homolog 2, mitochondrial                           | 0.68  |
| IPI00005715 | UBE4B Isoform 1 of Ubiquitin conjugation factor E4 B                   |       |
| IPI00334159 | VBP1 von Hippel-Lindau binding protein 1, isoform CRA_b                | 0.81  |
| IPI00020599 | CALR Calreticulin                                                      | 1.31  |
| IPI00021346 | UBE2E1 Ubiquitin-conjugating enzyme E2 E1                              | 0.39  |
| IPI00220566 | TXNRD2 Isoform 1 of Thioredoxin reductase 2, mitochondrial             | 2.7   |
| IPI00033907 | ANAPC1 Anaphase-promoting complex subunit 1                            | 1.09  |
| IPI00243221 | NRD1 nardilysin isoform a                                              | 0.71  |
| IPI00251559 | RNF20 E3 ubiquitin-protein ligase BRE1A                                | 0.81  |
| IPI00939163 | HSPH1 Isoform Alpha of Heat shock protein 105 kDa                      | 0.74  |
| IPI00006592 | MSRA Isoform 1 of Mitochondrial peptide methionine sulfoxide reductase | 1.42  |
| IPI00024664 | USP5 Isoform Long of Ubiquitin carboxyl-terminal hydrolase 5           | 1.83  |
| IPI00027626 | CCT6A T-complex protein 1 subunit zeta                                 | 0.89  |
| IPI00216192 | CLPB Isoform 2 of Caseinolytic peptidase B protein homolog             | 0.73  |
| IPI00893541 | PDIA3 14 kDa protein                                                   | 1.34  |
| IPI00936141 | AKTIP Isoform 2 of AKT-interacting protein                             | 3.11  |
| IPI00645078 | UBA1 Ubiquitin-like modifier-activating enzyme 1                       | 1.44  |
| IPI00329583 | SPATA5 Isoform 1 of Spermatogenesis-associated protein 5               | 2.64  |
| IPI00014301 | OXA1L Oxidase (Cytochrome c) assembly 1-like                           | 1.01  |
| IPI00301364 | SKP1 Isoform 1 of S-phase kinase-associated protein 1                  | 1.45  |
| IPI00100748 | HSPBP1 cDNA FLJ55382, highly similar to Hsp70-binding protein 1        | 0.73  |
| IPI00216003 | CUL5 Cullin-5                                                          | 1.33  |
| IPI00964791 | SIL1 Uncharacterized protein                                           | 1.15  |
| IPI00023406 | HCCS Cytochrome c-type heme lyase                                      | 1.12  |
| IPI00032871 | MSRB2 Similar to Methionine-R-sulfoxide reductase B2, mitochondrial    | 2.11  |
| IPI00027350 | PRDX2 Peroxiredoxin-2                                                  | 1.72  |
| IPI00646304 | PPIB Peptidyl-prolyl cis-trans isomerase B                             | 1.24  |
| IPI00793381 | PSMD6 Uncharacterized protein                                          | 1.08  |
| IPI00003985 | BCS1L Mitochondrial chaperone BCS1                                     | 1     |
| IPI00375631 | ISG15 Ubiquitin-like protein ISG15                                     | 10.35 |

|             |                                                                     |      |
|-------------|---------------------------------------------------------------------|------|
| IPI00647400 | RNPEP Uncharacterized protein                                       | 2.07 |
| IPI00027933 | PSMB10 Proteasome subunit beta type-10                              | 3.36 |
| IPI00657888 | GMPPA Isoform 2 of Mannose-1-phosphate guanyltransferase alpha      | 2.01 |
| IPI00013894 | STIP1 Stress-induced-phosphoprotein 1                               | 1.1  |
| IPI00031608 | SPATA5L1 Isoform 1 of Spermatogenesis-associated protein 5-like pr  | 1.75 |
| IPI00514173 | PPIE peptidyl-prolyl cis-trans isomerase E isoform 4                | 1    |
| IPI00604464 | UBE3C Isoform 1 of Ubiquitin-protein ligase E3C                     | 1.06 |
| IPI00033130 | SAE1 SUMO-activating enzyme subunit 1                               | 1.12 |
| IPI00028635 | RPN2 Dolichyl-diphosphooligosaccharide--protein glycosyltransferase | 1.49 |
| IPI00430812 | CNBP Isoform 1 of Cellular nucleic acid-binding protein             | 0.73 |
| IPI00157365 | NUB1 NEDD8 ultimate buster 1                                        | 1.21 |
| IPI00006800 | ATG5 Isoform Long of Autophagy protein 5                            | 1.3  |
| IPI00419585 | PPIA Peptidyl-prolyl cis-trans isomerase A                          | 1.04 |
| IPI00294701 | MNAT1 CDK-activating kinase assembly factor MAT1                    | 1.03 |
| IPI00420070 | ADAM15 Isoform 1 of Disintegrin and metalloproteinase domain-con    | 8.56 |
| IPI00022810 | CTSC Isoform 1 of Dipeptidyl peptidase 1                            | 0.62 |
| IPI00414463 | LCMT1 Isoform 2 of Leucine carboxyl methyltransferase 1             | 1.34 |
| IPI00000811 | PSMB6 Proteasome subunit beta type-6                                | 1.29 |
| IPI00005158 | LONP1 Lon protease homolog, mitochondrial                           | 2.01 |
| IPI00328161 | FKBP8 cDNA FLJ56370, highly similar to Homo sapiens FK506 bind      | 2.23 |
| IPI00010720 | CCT5 T-complex protein 1 subunit epsilon                            | 0.83 |
| IPI00013241 | UBL5 Ubiquitin-like protein 5                                       | 0.76 |
| IPI00018465 | CCT7 T-complex protein 1 subunit eta                                | 0.93 |
| IPI00001663 | HTRA2 Isoform 1 of Serine protease HTRA2, mitochondrial             | 2.76 |
| IPI00015809 | OSGEP Probable tRNA threonylcarbamoyladenosine biosynthesis pro     | 1.59 |
| IPI00020965 | UBE2H Ubiquitin-conjugating enzyme E2 H                             | 1.69 |
| IPI00022239 | METAP1 Methionine aminopeptidase 1                                  | 1.21 |
| IPI00793209 | UBL7 Ubiquitin-like 7 (Bone marrow stromal cell-derived), isoform C | 0.93 |
| IPI00021263 | YWHAZ 14-3-3 protein zeta/delta                                     | 1.02 |
| IPI00332376 | UBE2D2 Ubiquitin-conjugating enzyme E2 D2                           | 1.12 |
| IPI00294943 | ARIH1 E3 ubiquitin-protein ligase ARIH1                             | 1.06 |
| IPI00219025 | GLRX Glutaredoxin-1                                                 | 2.5  |
| IPI00183002 | PPP1R12A Isoform 1 of Protein phosphatase 1 regulatory subunit 12A  | 0.88 |
| IPI00012535 | DNAJA1 DnaJ homolog subfamily A member 1                            | 0.78 |
| IPI00019924 | TBCC Tubulin-specific chaperone C                                   |      |
| IPI00011609 | UBE3A Isoform II of Ubiquitin-protein ligase E3A                    | 0.83 |
| IPI00922443 | TBCE cDNA FLJ59210, highly similar to Tubulin-specific chaperone    | 1.31 |
| IPI00026993 | RNF2 E3 ubiquitin-protein ligase RING2                              | 0.9  |
| IPI00003565 | PSMD10 26S proteasome non-ATPase regulatory subunit 10              | 1.18 |
| IPI00007088 | ANAPC10 Anaphase-promoting complex subunit 10                       | 3.53 |
| IPI00514424 | PPT1 Uncharacterized protein                                        | 1.54 |
| IPI00027252 | PHB2 Prohibitin-2                                                   | 1.1  |
| IPI00008248 | ANAPC7 Isoform 1 of Anaphase-promoting complex subunit 7            | 0.68 |
| IPI00157375 | DNAJC30 DnaJ homolog subfamily C member 30                          | 1.19 |
| IPI00024524 | PNO1 RNA-binding protein PNO1                                       | 1.21 |
| IPI00105598 | PSMD11 Proteasome 26S non-ATPase subunit 11 variant (Fragment)      | 0.82 |
| IPI00008552 | GLRX3 Glutaredoxin-3                                                | 1.31 |
| IPI00419250 | GSTT2 Glutathione S-transferase theta-2                             | 1.42 |
| IPI00018798 | DNAJC17 DnaJ homolog subfamily C member 17                          | 1.25 |
| IPI00003927 | PPID Peptidyl-prolyl cis-trans isomerase D                          | 1.4  |
| IPI00418603 | UBE2R2 Ubiquitin-conjugating enzyme E2 R2                           | 1.64 |
| IPI00033132 | RNF7 Isoform 1 of RING-box protein 2                                | 2.35 |
| IPI00024776 | CLGN Calmegin                                                       | 1.54 |
| IPI00216247 | PSMD4 Uncharacterized protein                                       | 0.98 |
| IPI00006052 | PFDN2 Prefoldin subunit 2                                           | 0.94 |
| IPI00220362 | HSPE1 10 kDa heat shock protein, mitochondrial                      | 0.87 |
| IPI00152540 | CD109 Isoform 1 of CD109 antigen                                    | 2.13 |

|             |                                                                      |      |
|-------------|----------------------------------------------------------------------|------|
| IPI00002790 | SEL1L Isoform 1 of Protein sel-1 homolog 1                           | 1.42 |
| IPI00025512 | HSPB1 Heat shock protein beta-1                                      | 2.98 |
| IPI00299571 | PDIA6 Isoform 2 of Protein disulfide-isomerase A6                    | 1.63 |
| IPI00007019 | PP1L1 Peptidyl-prolyl cis-trans isomerase-like 1                     | 1.62 |
| IPI00022373 | NOB1 RNA-binding protein NOB1                                        | 1.09 |
| IPI00409659 | UBQLN2 Ubiquilin-2                                                   | 2.41 |
| IPI00025346 | PEX14 Isoform 1 of Peroxisomal membrane protein PEX14                | 1.12 |
| IPI00018398 | PSMC3 26S protease regulatory subunit 6A                             | 1.63 |
| IPI00045946 | YME1L1 Isoform 1 of ATP-dependent zinc metalloprotease YME1L1        | 0.83 |
| IPI00852960 | USP22 Isoform 1 of Ubiquitin carboxyl-terminal hydrolase 22          | 1.61 |
| IPI01024911 | PSMA6 28 kDa protein                                                 | 0.98 |
| IPI00329629 | DNAJC7 DnaJ homolog subfamily C member 7                             | 0.62 |
| IPI00074605 | NGLY1 Isoform 1 of Peptide-N(4)-(N-acetyl-beta-glucosaminy)aspar:    | 1.08 |
| IPI00479793 | MSRB3 Isoform 2 of Methionine-R-sulfoxide reductase B3               | 1.77 |
| IPI00003965 | USP7 Ubiquitin carboxyl-terminal hydrolase 7                         | 1.65 |
| IPI00024919 | PRDX3 Thioredoxin-dependent peroxide reductase, mitochondrial        | 1.23 |
| IPI00220656 | CCT6B T-complex protein 1 subunit zeta-2                             | 1.46 |
| IPI00152377 | STT3B Dolichyl-diphosphooligosaccharide--protein glycosyltransferase | 2.14 |
| IPI00014361 | TSTA3 GDP-L-fucose synthase                                          | 0.82 |
| IPI00007346 | PPIH Peptidyl-prolyl cis-trans isomerase H                           | 1.45 |
| IPI00640197 | TPP2 Uncharacterized protein                                         | 1.92 |
| IPI00926977 | PSMC6 26S protease regulatory subunit 10B                            | 0.87 |
| IPI00182180 | OTUD6B OTU domain-containing protein 6B                              | 0.95 |

---

## METABOLISM

---

### KOG category [C] Energy production and conversion

---

|             |                                                                               |       |
|-------------|-------------------------------------------------------------------------------|-------|
| IPI00478410 | ATP5C1 Isoform Liver of ATP synthase subunit gamma, mitochondri               | 0.94  |
| IPI00218848 | ATP5I ATP synthase, H <sup>+</sup> transporting, mitochondrial F0 complex, su | 0.87  |
| IPI00852927 | SLC25A1 Plasma membrane citrate carrier                                       | 1.77  |
| IPI00983296 | ACLY Uncharacterized protein                                                  | 1.44  |
| IPI00307334 | MTRR Isoform A of Methionine synthase reductase                               | 0.49  |
| IPI00470674 | CYB5R1 NADH-cytochrome b5 reductase 1                                         | 2.77  |
| IPI00007812 | ATP6V1B2 V-type proton ATPase subunit B, brain isoform                        | 1.74  |
| IPI00300886 | SLC25A32 Mitochondrial folate transporter/carrier                             | 1.62  |
| IPI00922223 | ATP6V0D1 Uncharacterized protein                                              | 1.89  |
| IPI00384643 | TP5I3 Isoform 1 of Quinone oxidoreductase PIG3                                | 1.03  |
| IPI00007682 | ATP6V1A V-type proton ATPase catalytic subunit A                              | 1.3   |
| IPI00306159 | MECR Isoform 1 of Trans-2-enoyl-CoA reductase, mitochondrial                  | 1.35  |
| IPI00394758 | ALDH3A2 Isoform 2 of Fatty aldehyde dehydrogenase                             | 1.57  |
| IPI00033034 | DLST;DLSTP1 Alpha-ketoglutarate dehydrogenase complex dihydrol                | 3.33  |
| IPI00305383 | UQCRC2 Cytochrome b-c1 complex subunit 2, mitochondrial                       | 1.64  |
| IPI00011201 | ME2 NAD-dependent malic enzyme, mitochondrial                                 | 1.26  |
| IPI00784119 | ATP6AP1 V-type proton ATPase subunit S1                                       | 1.95  |
| IPI00299719 | TCIRG1 Isoform Long of V-type proton ATPase 116 kDa subunit a is              | 2.21  |
| IPI00894154 | NDUFA10 Uncharacterized protein                                               | 1.27  |
| IPI00219682 | STOM Erythrocyte band 7 integral membrane protein                             | 3.91  |
| IPI00024742 | UQCRQ Cytochrome b-c1 complex subunit 8                                       | 1.73  |
| IPI00654820 | MT-ATP6 ATP synthase subunit a                                                | 1.16  |
| IPI00334190 | STOML2 Stomatin-like protein 2                                                | 1.87  |
| IPI00005966 | NDUFA12 13kDa differentiation-associated protein variant (Fragmen             | 1.23  |
| IPI00021793 | COX6A1 Cytochrome c oxidase subunit 6A1, mitochondrial                        | 16.61 |
| IPI00008215 | ME1 NADP-dependent malic enzyme                                               | 1.48  |
| IPI00007611 | ATP5O ATP synthase subunit O, mitochondrial                                   | 1.5   |
| IPI00255052 | NDUFB9 NADH dehydrogenase [ubiquinone] 1 beta subcomplex sub                  | 3.45  |
| IPI00096066 | SUCLG2 Succinyl-CoA ligase [GDP-forming] subunit beta, mitochon               | 1.5   |
| IPI00219772 | NDUFB7 NADH dehydrogenase [ubiquinone] 1 beta subcomplex sub                  | 1.19  |

|             |                                                                              |      |
|-------------|------------------------------------------------------------------------------|------|
| IPI00027448 | ATP5L ATP synthase subunit g, mitochondrial                                  | 1.01 |
| IPI00006579 | COX4I1 Cytochrome c oxidase subunit 4 isoform 1, mitochondrial               | 2.27 |
| IPI00464979 | SUCLA2 Isoform 1 of Succinyl-CoA ligase [ADP-forming] subunit beta           | 1.03 |
| IPI00220416 | UQCRB Cytochrome b-c1 complex subunit 7                                      | 1.28 |
| IPI00004902 | ETFB Isoform 1 of Electron transfer flavoprotein subunit beta                | 2.05 |
| IPI00028520 | NDUFV1 Isoform 1 of NADH dehydrogenase [ubiquinone] flavoprotein             | 1.7  |
| IPI00013968 | COX7C Cytochrome c oxidase subunit 7C, mitochondrial                         | 1.6  |
| IPI00022442 | NDUFAB1 Acyl carrier protein, mitochondrial                                  | 1.48 |
| IPI00974102 | BCKDHA cDNA FLJ45695 fis, clone FEBRA2013570, highly similar                 | 1.08 |
| IPI00420108 | DLST;DLSTP1 Dihydrolipoyllysine-residue succinyltransferase component        | 2.16 |
| IPI00025796 | NDUFS3 NADH dehydrogenase [ubiquinone] iron-sulfur protein 3, mitochondrial  | 1.82 |
| IPI00946714 | ATP6V1F V-type proton ATPase subunit F isoform 2                             | 1.61 |
| IPI00646556 | NDUFV2 Uncharacterized protein                                               | 1.3  |
| IPI00014440 | SLC25A17 Peroxisomal membrane protein PMP34                                  | 1.2  |
| IPI00291467 | SLC25A6 ADP/ATP translocase 3                                                | 0.81 |
| IPI00294911 | SDHB Succinate dehydrogenase [ubiquinone] iron-sulfur subunit, mitochondrial | 1.58 |
| IPI00291006 | MDH2 Malate dehydrogenase, mitochondrial                                     | 1.35 |
| IPI00790739 | ACO2 Uncharacterized protein                                                 | 2.2  |
| IPI00219381 | NDUFA2 NADH dehydrogenase [ubiquinone] 1 alpha subcomplex subunit            | 1.99 |
| IPI00022386 | TXNDC9 Thioredoxin domain-containing protein 9                               | 0.78 |
| IPI00376195 | ISCA2 Iron-sulfur cluster assembly 2 homolog, mitochondrial                  | 1.07 |
| IPI00892784 | ATP6V0A1 V-type proton ATPase 116 kDa subunit a isoform 1 isoform            | 2.68 |
| IPI00844050 | UQCC Isoform 1 of Ubiquinol-cytochrome c reductase complex chaperone         | 1.55 |
| IPI00028068 | SLC25A19 Mitochondrial thiamine pyrophosphate carrier                        | 1.83 |
| IPI00554681 | NDUFA5 NADH dehydrogenase [ubiquinone] 1 alpha subcomplex subunit            | 1.66 |
| IPI00220063 | NDUFS5 NADH dehydrogenase [ubiquinone] iron-sulfur protein 5                 | 1.44 |
| IPI00297325 | SDHD Succinate dehydrogenase [ubiquinone] cytochrome b small subunit         | 1.02 |
| IPI00029133 | ATP5F1 ATP synthase subunit b, mitochondrial                                 | 1.02 |
| IPI00945153 | NDUFA6 NADH dehydrogenase [ubiquinone] 1 alpha subcomplex subunit            | 2.19 |
| IPI00215777 | SLC25A3 Isoform B of Phosphate carrier protein, mitochondrial                | 1.62 |
| IPI00003856 | ATP6V1E1 V-type proton ATPase subunit E 1                                    | 1.42 |
| IPI00296191 | ATP6V1H Isoform 1 of V-type proton ATPase subunit H                          | 2.59 |
| IPI00219385 | NDUFB6 NADH dehydrogenase [ubiquinone] 1 beta subcomplex subunit             | 1.61 |
| IPI00026964 | UQCRCF1 Cytochrome b-c1 complex subunit Rieske, mitochondrial                | 1.23 |
| IPI00000792 | CRYZ Quinone oxidoreductase                                                  | 1.69 |
| IPI00007814 | ATP6V1C1 V-type proton ATPase subunit C 1                                    | 1.44 |
| IPI00215878 | ATP5E ATP synthase subunit epsilon, mitochondrial                            | 0.75 |
| IPI00015018 | PPA1 Inorganic pyrophosphatase                                               | 1.58 |
| IPI00022891 | SLC25A4 ADP/ATP translocase 1                                                | 1.45 |
| IPI00015911 | DLD Dihydrolipoyl dehydrogenase, mitochondrial                               | 1.65 |
| IPI00947127 | LDHA L-lactate dehydrogenase A chain isoform 3                               | 1.06 |
| IPI00024920 | ATP5D ATP synthase subunit delta, mitochondrial                              | 1.14 |
| IPI00168884 | ATP6AP2 Renin receptor                                                       | 2.16 |
| IPI00021338 | DLAT Dihydrolipoyllysine-residue acetyltransferase component of pyruvate     | 1.38 |
| IPI00156689 | VAT1 Synaptic vesicle membrane protein VAT-1 homolog                         | 4.41 |
| IPI00025285 | ATP6V1G1 V-type proton ATPase subunit G 1                                    | 1.33 |
| IPI00456008 | ATP5J ATP synthase-coupling factor 6, mitochondrial isoform b precursor      | 1.94 |
| IPI00220487 | ATP5H Isoform 1 of ATP synthase subunit d, mitochondrial                     | 2.01 |
| IPI00465315 | CYCS Cytochrome c                                                            | 0.68 |
| IPI00023406 | HCCS Cytochrome c-type heme lyase                                            | 1.12 |
| IPI00479877 | ALDH9A1 4-trimethylaminobutyraldehyde dehydrogenase                          | 1.17 |
| IPI00927647 | POR NADPH--cytochrome P450 reductase                                         | 1.38 |
| IPI00219383 | NDUFB3 NADH dehydrogenase [ubiquinone] 1 beta subcomplex subunit             | 1.8  |
| IPI00001568 | ATP6V1D V-type proton ATPase subunit D                                       | 1.34 |
| IPI00003925 | PDHB Isoform 1 of Pyruvate dehydrogenase E1 component subunit beta           | 1.28 |
| IPI00022977 | CKB Creatine kinase B-type                                                   | 0.94 |
| IPI00296053 | FH Isoform Mitochondrial of Fumarate hydratase, mitochondrial                | 1.81 |



|             |                                                                    |      |
|-------------|--------------------------------------------------------------------|------|
| IPI00947328 | NDUFB5 Protein                                                     | 1.55 |
| IPI00965327 | SDHA Uncharacterized protein                                       | 1.14 |
| IPI00037448 | GRHPR Glyoxylate reductase/hydroxypyruvate reductase               | 0.97 |
| IPI00797738 | COX6B1 Cytochrome c oxidase subunit 6B1                            | 1.39 |
| IPI00026663 | ALDH1A3 Aldehyde dehydrogenase family 1 member A3                  | 1.72 |
| IPI00009634 | SQRDL Sulfide:quinone oxidoreductase, mitochondrial                | 1.87 |
| IPI00003004 | SLC25A22 Mitochondrial glutamate carrier 1                         | 0.97 |
| IPI00006663 | ALDH2 Aldehyde dehydrogenase, mitochondrial                        | 1.6  |
| IPI00010810 | ETFA Electron transfer flavoprotein subunit alpha, mitochondrial   | 1.84 |
| IPI00219217 | LDHB L-lactate dehydrogenase B chain                               | 0.8  |
| IPI00298423 | PDHX Pyruvate dehydrogenase protein X component, mitochondrial     | 1.52 |
| IPI00025344 | NDUFS6 NADH dehydrogenase [ubiquinone] iron-sulfur protein 6, m    | 1.25 |
| IPI00027233 | SCO1 Protein SCO1 homolog, mitochondrial                           | 1.44 |
| IPI00303476 | ATP5B ATP synthase subunit beta, mitochondrial                     | 1.16 |
| IPI00019326 | FDX1 Adrenodoxin, mitochondrial                                    | 1.01 |
| IPI01022198 | NDUFA12 Uncharacterized protein                                    | 1.22 |
| IPI01024808 | 26 kDa protein                                                     | 2.1  |
| IPI00604664 | NDUFS1 NADH-ubiquinone oxidoreductase 75 kDa subunit, mitocho      | 1.79 |
| IPI00303954 | CYB5B cytochrome b5 type B precursor                               | 1.41 |
| IPI00025239 | NDUFS2 NADH dehydrogenase [ubiquinone] iron-sulfur protein 2, m    | 1.57 |
| IPI00296022 | UQCRH Cytochrome b-c1 complex subunit 6, mitochondrial             | 0.99 |
| IPI00336008 | ALDH5A1 succinate-semialdehyde dehydrogenase, mitochondrial iso    | 1.76 |
| IPI00964764 | SDHA cDNA FLJ55072, highly similar to Succinate dehydrogenase (u   | 1.28 |
| IPI00032633 | COQ6 Ubiquinone biosynthesis monooxygenase COQ6                    | 3.39 |
| IPI00306301 | PDHA1 pyruvate dehydrogenase E1 component subunit alpha, somati    | 1.55 |
| IPI01018162 | PRKAG1 5'-AMP-activated protein kinase subunit gamma-1 isoform     | 1.31 |
| IPI00954806 | CYB5R3 NADH-cytochrome b5 reductase 3 isoform 3                    | 2.2  |
| IPI00028883 | NDUFB8 NADH dehydrogenase [ubiquinone] 1 beta subcomplex sub       | 3.89 |
| IPI00440493 | ATP5A1 ATP synthase subunit alpha, mitochondrial                   | 1.16 |
| IPI00025086 | COX5A Cytochrome c oxidase subunit 5A, mitochondrial               | 1.35 |
| IPI00299402 | PC Pyruvate carboxylase, mitochondrial                             | 2.78 |
| IPI00219729 | SLC25A11 Mitochondrial 2-oxoglutarate/malate carrier protein       | 1.36 |
| IPI00219034 | NDUFA8 NADH dehydrogenase [ubiquinone] 1 alpha subcomplex sul      | 1.98 |
| IPI00103467 | ALDH1B1 Aldehyde dehydrogenase X, mitochondrial                    | 1.87 |
| IPI01009519 | NDUFS7 NADH dehydrogenase [ubiquinone] iron-sulfur protein 7, m    | 1    |
| IPI00010845 | NDUFS8 NADH dehydrogenase [ubiquinone] iron-sulfur protein 8, m    | 1.21 |
| IPI00003968 | NDUFA9 NADH dehydrogenase [ubiquinone] 1 alpha subcomplex sul      | 1.27 |
| IPI00014458 | SCO2 Protein SCO2 homolog, mitochondrial                           | 0.57 |
| IPI00029558 | NDUFC2 NADH dehydrogenase [ubiquinone] 1 subunit C2                | 3.6  |
| IPI00438923 | CRYZL1 Quinone oxidoreductase-like protein 1                       | 0.93 |
| IPI00872762 | SUCLG1 Succinyl-CoA ligase [GDP-forming] subunit alpha, mitocho    | 1.04 |
| IPI00007188 | SLC25A5 ADP/ATP translocase 2                                      | 0.75 |
| IPI00296999 | ATPAF2 ATP synthase mitochondrial F1 complex assembly factor 2     | 0.66 |
| IPI00008234 | CYB5R2 Isoform 1 of NADH-cytochrome b5 reductase 2                 | 2.53 |
| IPI00025366 | CS Citrate synthase, mitochondrial                                 | 1.64 |
| IPI00000425 | ATP6V0A2 V-type proton ATPase 116 kDa subunit a isoform 2          | 5.78 |
| IPI00452731 | NDUFA7 NADH dehydrogenase [ubiquinone] 1 alpha subcomplex sul      | 1.94 |
| IPI00029264 | CYC1 Cytochrome c1, heme protein, mitochondrial                    | 1.26 |
| IPI00930710 | SLC25A13 calcium-binding mitochondrial carrier protein Aralar2 iso | 1.94 |
| IPI00013957 | SLC25A20 Mitochondrial carnitine/acylcarnitine carrier protein     | 2.4  |
| IPI00017895 | GPD2 Isoform 1 of Glycerol-3-phosphate dehydrogenase, mitochondri  | 2.06 |
| IPI00032959 | GPD1L Glycerol-3-phosphate dehydrogenase 1-like protein            | 1.17 |
| IPI00021785 | COX5B Cytochrome c oxidase subunit 5B, mitochondrial               | 3.48 |
| IPI00470502 | PPA2 Isoform 2 of Inorganic pyrophosphatase 2, mitochondrial       | 1.95 |
| IPI00011217 | NDUFS4 NADH dehydrogenase [ubiquinone] iron-sulfur protein 4, m    | 1.35 |
| IPI00027223 | IDH1 Isocitrate dehydrogenase [NADP] cytoplasmic                   | 1.3  |
| IPI00167639 | ATP6V0D2 V-type proton ATPase subunit d 2                          | 2.02 |

| <b>KOG category [G] Carbohydrate transport and metabolism</b> |                                                                      |      |
|---------------------------------------------------------------|----------------------------------------------------------------------|------|
| IPI00744692                                                   | TALDO1 Transaldolase                                                 | 1.06 |
| IPI00383581                                                   | GANAB cDNA FLJ61290, highly similar to Neutral alpha-glucosidase     | 8.3  |
| IPI00908881                                                   | GPI Glucose-6-phosphate isomerase                                    | 1.28 |
| IPI00027851                                                   | HEXA cDNA FLJ53927, highly similar to Beta-hexosaminidase alpha      | 0.62 |
| IPI00024990                                                   | ALDH6A1 Methylmalonate-semialdehyde dehydrogenase [acylating]        | 5.94 |
| IPI00012833                                                   | PPP4C Serine/threonine-protein phosphatase 4 catalytic subunit       | 1.44 |
| IPI00921849                                                   | cDNA FLJ57046, highly similar to Lysosomal alpha-glucosidase         | 3.68 |
| IPI00293088                                                   | GAA Lysosomal alpha-glucosidase                                      | 1.37 |
| IPI00550364                                                   | PGM2 Phosphoglucomutase-2                                            | 1.08 |
| IPI00011454                                                   | GANAB Isoform 2 of Neutral alpha-glucosidase AB                      | 2.31 |
| IPI00657888                                                   | GMPPA Isoform 2 of Mannose-1-phosphate guanyltransferase alpha       | 2.01 |
| IPI01018161                                                   | PKM2 pyruvate kinase isozymes M1/M2 isoform c                        | 2.25 |
| IPI00783313                                                   | PYGL Glycogen phosphorylase, liver form                              | 1.45 |
| IPI00009790                                                   | PFKP 6-phosphofructokinase type C                                    | 1.09 |
| IPI00006907                                                   | C12orf5 Probable fructose-2,6-bisphosphatase TIGAR                   | 0.95 |
| IPI00219525                                                   | PGD 6-phosphogluconate dehydrogenase, decarboxylating                | 1.04 |
| IPI00332371                                                   | PFKL Isoform 1 of 6-phosphofructokinase, liver type                  | 1.37 |
| IPI00102864                                                   | HK2 Hexokinase-2                                                     | 1.09 |
| IPI00216008                                                   | G6PD Isoform Long of Glucose-6-phosphate 1-dehydrogenase             | 1.97 |
| IPI00551024                                                   | DAK Bifunctional ATP-dependent dihydroxyacetone kinase/FAD-AM        | 1.78 |
| IPI00305010                                                   | CPPED1 Isoform 1 of Calcineurin-like phosphoesterase domain-conta    | 1.49 |
| IPI00220766                                                   | GLO1 Isoform 1 of Lactoylglutathione lyase                           | 1.07 |
| IPI00418262                                                   | ALDOC Fructose-bisphosphate aldolase                                 | 3.02 |
| IPI00908404                                                   | GNS cDNA FLJ51188, highly similar to N-acetylglucosamine-6-sulfa     | 1.92 |
| IPI00012989                                                   | MAN2B1 Lysosomal alpha-mannosidase                                   | 0.49 |
| IPI00000138                                                   | MGAT1 Alpha-1,3-mannosyl-glycoprotein 2-beta-N-acetylglucosamin      | 1.43 |
| IPI00021807                                                   | GBA cDNA FLJ56157, highly similar to Glucosylceramidase              | 3.23 |
| IPI00219018                                                   | GAPDH Glyceraldehyde-3-phosphate dehydrogenase                       | 1.17 |
| IPI00335280                                                   | LOC729020;RPE Isoform 1 of Ribulose-phosphate 3-epimerase            | 2.35 |
| IPI00169383                                                   | PGK1 Phosphoglycerate kinase 1                                       | 1.58 |
| IPI00029997                                                   | PGLS 6-phosphogluconolactonase                                       | 2.15 |
| IPI00922751                                                   | SLC2A14 cDNA FLJ56136, highly similar to Solute carrier family 2,    | 3.38 |
| IPI00292228                                                   | GSK3A Glycogen synthase kinase-3 alpha                               | 3.19 |
| IPI00024466                                                   | UGGT1 Isoform 1 of UDP-glucose:glycoprotein glucosyltransferase 1    | 1.28 |
| IPI00414323                                                   | SMEK2 Isoform 1 of Serine/threonine-protein phosphatase 4 regulato   | 1.07 |
| IPI00479186                                                   | PKM2 Isoform M2 of Pyruvate kinase isozymes M1/M2                    | 1.14 |
| IPI00465248                                                   | ENO1 Isoform alpha-enolase of Alpha-enolase                          | 1.15 |
| IPI00796919                                                   | GLB1 Beta-galactosidase                                              | 1.62 |
| IPI00554481                                                   | SLC3A2 Isoform 4 of 4F2 cell-surface antigen heavy chain             | 3.61 |
| IPI00873223                                                   | UGP2 cDNA FLJ56155, highly similar to UTP--glucose-1-phosphate       | 1.24 |
| IPI00027497                                                   | GPI Glucose-6-phosphate isomerase                                    | 0.83 |
| IPI00219825                                                   | PSAP Uncharacterized protein                                         | 3.82 |
| IPI00465179                                                   | PFKM 6-phosphofructokinase, muscle type isoform 1                    | 1.01 |
| IPI00290279                                                   | ADK Isoform Long of Adenosine kinase                                 | 1.2  |
| IPI00107722                                                   | MCEE Methylmalonyl-CoA epimerase, mitochondrial                      | 2    |
| IPI00911064                                                   | APIP cDNA FLJ58961, highly similar to APAF1-interacting protein      | 1.34 |
| IPI00643920                                                   | TKT cDNA FLJ54957, highly similar to Transketolase                   | 1.95 |
| IPI00926925                                                   | OGDH Uncharacterized protein                                         | 1.65 |
| IPI00220194                                                   | SLC2A1 Solute carrier family 2, facilitated glucose transporter memb | 1.68 |
| IPI00216725                                                   | PHKA1 Uncharacterized protein                                        | 1.24 |
| IPI00796333                                                   | ALDOA 45 kDa protein                                                 | 1.03 |
| IPI00011656                                                   | B4GALT5 Beta-1,4-galactosyltransferase 5                             | 2.21 |
| IPI00219526                                                   | PGM1 Isoform 1 of Phosphoglucomutase-1                               | 1.37 |
| IPI00216171                                                   | ENO2 Gamma-enolase                                                   | 1.65 |
| IPI00012585                                                   | HEXB Beta-hexosaminidase subunit beta                                | 1.2  |
| IPI00645172                                                   | CARKD Isoform 2 of Carbohydrate kinase domain-containing protein     | 5.22 |

|             |                                                                   |      |
|-------------|-------------------------------------------------------------------|------|
| IPI00004358 | PYGB Glycogen phosphorylase, brain form                           | 1.51 |
| IPI00328170 | MOGS Mannosyl-oligosaccharide glucosidase                         | 1.71 |
| IPI00030116 | PGM3 phosphoacetylglucosamine mutase isoform 1                    | 1.12 |
| IPI00016968 | SDHC Isoform 1 of Succinate dehydrogenase cytochrome b560 subunit | 1.66 |
| IPI00014361 | TSTA3 GDP-L-fucose synthase                                       | 0.82 |
| IPI00019383 | GALK1 cDNA FLJ56840, highly similar to Galactokinase              | 0.97 |
| IPI00027745 | GUSB Isoform Long of Beta-glucuronidase                           | 1.6  |
| IPI00184363 | GLTP Glycolipid transfer protein                                  | 0.79 |
| IPI00549725 | PGAM1 Phosphoglycerate mutase 1                                   | 1.27 |
| IPI00465028 | TPI1;TPI1P1 triosephosphate isomerase isoform 2                   | 1.16 |

---

**KOG category [E] Amino acid transport and metabolism**

---

|             |                                                                              |      |
|-------------|------------------------------------------------------------------------------|------|
| IPI00165949 | ERAP1 Isoform 2 of Endoplasmic reticulum aminopeptidase 1                    | 2.57 |
| IPI00549467 | NIT2 Omega-amidase NIT2                                                      | 1.87 |
| IPI00031557 | CTH Isoform 1 of Cystathionine gamma-lyase                                   | 4.06 |
| IPI00024990 | ALDH6A1 Methylmalonate-semialdehyde dehydrogenase [acylating]                | 5.94 |
| IPI00001734 | PSAT1 Phosphoserine aminotransferase                                         | 2.1  |
| IPI00101652 | SCLY selenocysteine lyase                                                    | 1.77 |
| IPI00647400 | RNPEP Uncharacterized protein                                                | 2.07 |
| IPI00554541 | ILVBL Isoform 1 of Acetolactate synthase-like protein                        | 2.43 |
| IPI00220267 | ASL Argininosuccinate lyase                                                  | 1.28 |
| IPI00215687 | GLS Isoform 3 of Glutaminase kidney isoform, mitochondrial                   | 1.2  |
| IPI00983406 | BCAT1 branched-chain-amino-acid aminotransferase, cytosolic isoform          | 2.01 |
| IPI00011604 | GCSH Glycine cleavage system H protein, mitochondrial                        | 1.07 |
| IPI00387077 | SLC12A9 Isoform 1 of Solute carrier family 12 member 9                       | 1.57 |
| IPI00005102 | SMS Isoform 1 of Spermine synthase                                           | 1.55 |
| IPI00009923 | P4HA1 Isoform 1 of Prolyl 4-hydroxylase subunit alpha-1                      | 2.62 |
| IPI00024580 | MCCC1 Methylcrotonoyl-CoA carboxylase subunit alpha, mitochondrial           | 1.35 |
| IPI00646105 | PYCR1 pyrroline-5-carboxylate reductase 3                                    | 0.59 |
| IPI00554777 | ASNS Asparagine synthetase [glutamine-hydrolyzing]                           | 1.24 |
| IPI00019178 | PSPH Phosphoserine phosphatase                                               | 2.33 |
| IPI00784044 | MCCC2 Isoform 1 of Methylcrotonoyl-CoA carboxylase beta chain, mitochondrial | 1.79 |
| IPI00011200 | PHGDH D-3-phosphoglycerate dehydrogenase                                     | 1.72 |
| IPI00027728 | SLC7A1 High affinity cationic amino acid transporter 1                       | 2.46 |
| IPI00917456 | ASNSD1 Uncharacterized protein                                               | 7.23 |
| IPI00003128 | P4HA2 Isoform IIb of Prolyl 4-hydroxylase subunit alpha-2                    | 1.85 |
| IPI00026216 | NPEPPS Puromycin-sensitive aminopeptidase                                    | 1.33 |
| IPI00642211 | RNPEP Aminopeptidase B                                                       | 1.89 |
| IPI00419596 | MOXD1 Isoform 1 of DBH-like monooxygenase protein 1                          | 1.57 |
| IPI00019407 | NSDHL Sterol-4-alpha-carboxylate 3-dehydrogenase, decarboxylating            | 1.51 |
| IPI00470610 | PYCR2 Pyrroline-5-carboxylate reductase 2                                    | 0.98 |
| IPI00292020 | SRM Spermidine synthase                                                      | 1.19 |
| IPI00219077 | LTA4H Isoform 1 of Leukotriene A-4 hydrolase                                 | 1.39 |
| IPI00456664 | NIT1 Isoform 4 of Nitrilase homolog 1                                        | 1.24 |
| IPI00177728 | CNDP2 Isoform 1 of Cytosolic non-specific dipeptidase                        | 1.73 |
| IPI00465160 | ABCF3 Isoform 1 of ATP-binding cassette sub-family F member 3                | 1.26 |
| IPI01011873 | XPNPEP1 xaa-Pro aminopeptidase 1 isoform 1                                   | 1.72 |
| IPI00410034 | SLC38A2 Isoform 1 of Sodium-coupled neutral amino acid transporter           | 2.85 |
| IPI00871279 | SLC38A1 Uncharacterized protein                                              | 2.64 |
| IPI00550882 | PYCR1 Pyrroline-5-carboxylate reductase                                      | 1.1  |
| IPI00718888 | PRPS2 Isoform 2 of Ribose-phosphate pyrophosphokinase 2                      | 0.73 |
| IPI00103884 | OVCA2 Ovarian cancer-associated gene 2 protein                               | 0.8  |
| IPI00018206 | GOT2 Aspartate aminotransferase, mitochondrial                               | 1.11 |
| IPI00016801 | GLUD1 Glutamate dehydrogenase 1, mitochondrial                               | 1.37 |
| IPI00030702 | IDH3A Isoform 1 of Isocitrate dehydrogenase [NAD] subunit alpha, nuclear     | 1.3  |
| IPI00250297 | AASDHPPT L-aminoadipate-semialdehyde dehydrogenase-phosphoprotein            | 0.93 |
| IPI00219029 | GOT1 Aspartate aminotransferase, cytoplasmic                                 | 1.96 |
| IPI00640525 | CTSA lysosomal protective protein isoform a precursor                        | 0.73 |

|             |                                                                    |      |
|-------------|--------------------------------------------------------------------|------|
| IPI00026970 | SUPT16H FACT complex subunit SPT16                                 | 0.92 |
| IPI00247063 | MME Neprilysin                                                     | 2.13 |
| IPI00002478 | ECE1 Isoform B of Endothelin-converting enzyme 1                   | 2.14 |
| IPI00790739 | ACO2 Uncharacterized protein                                       | 2.2  |
| IPI00982108 | DNPEP cDNA FLJ56420, highly similar to Aspartyl aminopeptidase     | 2.44 |
| IPI00396258 | BCAT2 Isoform A of Branched-chain-amino-acid aminotransferase, n   | 1.69 |
| IPI00010090 | GCLM Glutamate--cysteine ligase regulatory subunit                 | 1.06 |
| IPI00295240 | NFS1 Isoform Mitochondrial of Cysteine desulfurase, mitochondrial  | 1.08 |
| IPI00002520 | SHMT2 Serine hydroxymethyltransferase, mitochondrial               | 0.87 |
| IPI00217871 | ALDH4A1 Delta-1-pyrroline-5-carboxylate dehydrogenase, mitochondri | 3    |
| IPI00038378 | ENOPH1 Isoform 1 of Enolase-phosphatase E1                         | 1.17 |
| IPI00304417 | IDH3B Isocitrate dehydrogenase [NAD] subunit beta, mitochondrial p | 1.09 |
| IPI00024317 | GCDH Isoform Long of Glutaryl-CoA dehydrogenase, mitochondrial     | 0.9  |
| IPI00002324 | MAT2B Isoform 1 of Methionine adenosyltransferase 2 subunit beta   | 1.06 |
| IPI00307017 | LNPEP Isoform 1 of Leucyl-cystinyl aminopeptidase                  | 2.45 |
| IPI00465261 | ERAP2 Isoform 1 of Endoplasmic reticulum aminopeptidase 2          | 1.86 |
| IPI00008986 | SLC7A5 Large neutral amino acids transporter small subunit 1       | 3.22 |
| IPI00009268 | ACY1;ABHD14A cDNA FLJ60317, highly similar to Aminoacylase-        | 2.15 |
| IPI00022334 | OAT Ornithine aminotransferase, mitochondrial                      | 1.11 |
| IPI00002519 | SHMT1 Isoform 1 of Serine hydroxymethyltransferase, cytosolic      | 0.94 |
| IPI00220150 | IDH3G Isocitrate dehydrogenase [NAD] subunit gamma, mitochondri    | 1.16 |
| IPI00030328 | SRR Serine racemase                                                | 1.34 |
| IPI00219616 | PRPS1 Ribose-phosphate pyrophosphokinase 1                         | 0.82 |
| IPI00152432 | GPT2 Isoform 1 of Alanine aminotransferase 2                       | 0.95 |
| IPI00033217 | AASS Alpha-aminoadipic semialdehyde synthase, mitochondrial        | 2    |
| IPI00221224 | ANPEP Aminopeptidase N                                             | 1.67 |
| IPI00789848 | IVD isovaleryl-CoA dehydrogenase, mitochondrial isoform 1 precurs  | 1    |
| IPI00030182 | GAMT Guanidinoacetate N-methyltransferase                          | 1.72 |

---

**KOG category [F] Nucleotide transport and metabolism**

|             |                                                                      |      |
|-------------|----------------------------------------------------------------------|------|
| IPI00465256 | AK3 GTP:AMP phosphotransferase, mitochondrial                        | 2.32 |
| IPI00640817 | AK1 Uncharacterized protein                                          | 1.26 |
| IPI00003923 | UMPS Isoform 1 of Uridine 5'-monophosphate synthase                  | 1.05 |
| IPI00016568 | AK4;LOC100507855 Adenylate kinase isoenzyme 4, mitochondrial         | 2.66 |
| IPI00556376 | CRMP1 dihydropyrimidinase-related protein 1 isoform 1                | 2.21 |
| IPI00218693 | APRT Adenine phosphoribosyltransferase                               | 1.81 |
| IPI00029534 | PPAT Amidophosphoribosyltransferase                                  | 0.98 |
| IPI00845319 | EPN3 cDNA FLJ54010, highly similar to Epsin-3                        | 0.87 |
| IPI00027139 | INPP1 Inositol polyphosphate 1-phosphatase                           | 1.03 |
| IPI00024462 | DHODH Dihydroorotate dehydrogenase (quinone), mitochondrial          | 1.54 |
| IPI00007722 | AMPD2 Adenosine monophosphate deaminase 2                            | 1.51 |
| IPI00013871 | RRM1 Ribonucleoside-diphosphate reductase large subunit              | 0.34 |
| IPI00718888 | PRPS2 Isoform 2 of Ribose-phosphate pyrophosphokinase 2              | 0.73 |
| IPI00645702 | CTPS2 CTP synthase 2                                                 | 0.97 |
| IPI00873506 | GDA Guanine aminohydrolase                                           | 3.34 |
| IPI00900260 | ARHGEF7 Isoform 5 of Rho guanine nucleotide exchange factor 7        | 1.09 |
| IPI00013862 | DTYMK Thymidylate kinase                                             | 0.85 |
| IPI00011876 | MTAP cDNA FLJ59758, highly similar to S-methyl-5-thioadenosine j     | 1.64 |
| IPI00017672 | PNP cDNA FLJ25678 fis, clone TST04067, highly similar to PURINE      | 1.54 |
| IPI00964123 | PAICS Uncharacterized protein                                        | 0.81 |
| IPI00289499 | ATIC Bifunctional purine biosynthesis protein PURH                   | 1.18 |
| IPI00647389 | EPN1 Isoform 2 of Epsin-1                                            | 2.22 |
| IPI00410214 | BPNT1 Isoform 1 of 3'(2'),5'-bisphosphate nucleotidase 1             | 1.21 |
| IPI00375015 | DUT Isoform 2 of Deoxyuridine 5'-triphosphate nucleotidohydrolase, i | 2.55 |
| IPI00029079 | GMPS GMP synthase [glutamine-hydrolyzing]                            | 0.93 |
| IPI00009456 | NT5E 5'-nucleotidase                                                 | 2.24 |
| IPI00375527 | IMPDH1 inosine-5'-monophosphate dehydrogenase 1 isoform a            | 0.71 |
| IPI01009463 | NME6 nucleoside diphosphate kinase 6                                 | 1.12 |

|             |                                                                |      |
|-------------|----------------------------------------------------------------|------|
| IPI00942092 | ADSL Isoform 1 of Adenylosuccinate lyase                       | 1.07 |
| IPI00291510 | IMPDH2 Inosine-5'-monophosphate dehydrogenase 2                | 1.21 |
| IPI00218729 | DLG1 Isoform 2 of Disks large homolog 1                        | 1.36 |
| IPI00815732 | PAICS Isoform 2 of Multifunctional protein ADE2                | 0.83 |
| IPI00883655 | DPYSL2 dihydropyrimidinase-related protein 2 isoform 1         | 2.46 |
| IPI00294997 | NME7 Isoform 1 of Nucleoside diphosphate kinase 7              | 1.88 |
| IPI00026833 | ADSS Adenylosuccinate synthetase isozyme 2                     | 0.89 |
| IPI00219953 | CMPK1 UMP-CMP kinase isoform a                                 | 1.58 |
| IPI00903024 | MTAP Uncharacterized protein                                   | 0.8  |
| IPI00296441 | ADA Adenosine deaminase                                        | 0.88 |
| IPI00215901 | AK2 Isoform 1 of Adenylate kinase 2, mitochondrial             | 1.86 |
| IPI00022388 | DPYSL4 Dihydropyrimidinase-related protein 4                   | 2.03 |
| IPI00012315 | NME3 Nucleoside diphosphate kinase 3                           | 1.43 |
| IPI00290142 | CTPS CTP synthase 1                                            | 1.05 |
| IPI00219616 | PRPS1 Ribose-phosphate pyrophosphokinase 1                     | 0.82 |
| IPI00642176 | C9orf95 Uncharacterized protein                                | 3.05 |
| IPI00032879 | TAF9 Isoform 1 of Adenylate kinase isoenzyme 6                 | 2.36 |
| IPI00290614 | ENDOG Endonuclease G, mitochondrial                            | 0.92 |
| IPI00158280 | ALDH1L1 Formyltetrahydrofolate dehydrogenase isoform a variant | 5.29 |
| IPI00554705 | DCTD Isoform 2 of Deoxycytidylate deaminase                    | 0.79 |
| IPI00335509 | DPYSL5 Dihydropyrimidinase-related protein 5                   | 0.94 |
| IPI00644488 | GUK1 guanylate kinase isoform a                                | 1.2  |
| IPI00018783 | ITPA Inosine triphosphate pyrophosphatase                      | 1.25 |
| IPI00910128 | FDXR cDNA FLJ59457, highly similar to NADPH:adrenodoxin oxid   | 1.56 |
| IPI00375531 | NME1;NME2;NME1-NME2 Isoform 2 of Nucleoside diphosphate kir    | 0.94 |
| IPI00298308 | ALDH1L2 Isoform 1 of Aldehyde dehydrogenase family 1 member L2 | 1.67 |
| IPI00011118 | RRM2 ribonucleoside-diphosphate reductase subunit M2 isoform 1 | 0.51 |

---

**KOG category [H] Coenzyme transport and metabolism**

---

|             |                                                                  |      |
|-------------|------------------------------------------------------------------|------|
| IPI00954806 | CYB5R3 NADH-cytochrome b5 reductase 3 isoform 3                  | 2.2  |
| IPI00030357 | DHFRP1;DHFR Dihydrofolate reductase                              | 0.68 |
| IPI00008234 | CYB5R2 Isoform 1 of NADH-cytochrome b5 reductase 2               | 2.53 |
| IPI00031357 | PPOX Protoporphyrinogen oxidase                                  | 1.82 |
| IPI00007404 | ATG7 Isoform 1 of Ubiquitin-like modifier-activating enzyme ATG7 | 1.61 |
| IPI00306689 | NADSYN1 Glutamine-dependent NAD(+) synthetase                    | 1.05 |
| IPI00470674 | CYB5R1 NADH-cytochrome b5 reductase 1                            | 2.77 |
| IPI00009726 | NMNAT1 Nicotinamide mononucleotide adenylyltransferase 1         | 0.96 |
| IPI00301489 | UROD Uroporphyrinogen decarboxylase                              | 1.58 |
| IPI00028160 | HMBS Isoform 1 of Porphobilinogen deaminase                      | 1.5  |
| IPI00001734 | PSAT1 Phosphoserine aminotransferase                             | 2.1  |
| IPI00442121 | ALAD Isoform 2 of Delta-aminolevulinic acid dehydratase          | 1.09 |
| IPI00013004 | PDXK Isoform 1 of Pyridoxal kinase                               | 1.25 |
| IPI00099995 | RFK cDNA, FLJ96841                                               | 1.92 |
| IPI00011307 | MTHFD2 Bifunctional methylenetetrahydrofolate dehydrogenase/cycl | 1.8  |
| IPI00220567 | MTHFS 5-formyltetrahydrofolate cyclo-ligase                      | 0.95 |
| IPI00794900 | MTHFD1 cDNA FLJ56016, highly similar to C-1-tetrahydrofolate syr | 0.93 |
| IPI00093057 | CPOX Coproporphyrinogen-III oxidase, mitochondrial               | 1.51 |
| IPI00554541 | ILVBL Isoform 1 of Acetolactate synthase-like protein            | 2.43 |
| IPI00250297 | AASDHPPT L-aminoadipate-semialdehyde dehydrogenase-phosphop      | 0.93 |
| IPI00456965 | COQ5 Isoform 1 of 2-methoxy-6-polyprenyl-1,4-benzoquinol methyl  | 1.25 |
| IPI00012007 | AHCY Adenosylhomocysteinase                                      | 0.87 |
| IPI00215768 | GCLC Glutamate--cysteine ligase catalytic subunit                | 1.46 |
| IPI00182938 | AHCYL1 Isoform 1 of Putative adenosylhomocysteinase 2            | 1.83 |
| IPI00914566 | FDPS Farnesyl pyrophosphate synthase                             | 1.2  |
| IPI00010157 | MAT2A S-adenosylmethionine synthase isoform type-2               | 1.13 |
| IPI00032633 | COQ6 Ubiquinone biosynthesis monooxygenase COQ6                  | 3.39 |
| IPI00418414 | COQ3 Hexaprenyldihydroxybenzoate methyltransferase, mitochondri  | 1.87 |
| IPI00018272 | PNPO Pyridoxine-5'-phosphate oxidase                             | 1.44 |

|                                                        |                                                                   |      |
|--------------------------------------------------------|-------------------------------------------------------------------|------|
| IPI00980776                                            | RFK Conserved hypothetical protein                                | 1.19 |
| <b>KOG category [I] Lipid transport and metabolism</b> |                                                                   |      |
| IPI00016457                                            | CRAT Isoform 1 of Carnitine O-acetyltransferase                   | 2.85 |
| IPI00299468                                            | SCD Acyl-CoA desaturase                                           | 3.95 |
| IPI00550377                                            | ACBD5 Isoform 3 of Acyl-CoA-binding domain-containing protein 5   | 1.07 |
| IPI00017802                                            | AUH Isoform 1 of Methylglutaconyl-CoA hydratase, mitochondrial    | 1.77 |
| IPI00009747                                            | LSS Lanosterol synthase                                           | 2.02 |
| IPI00300567                                            | ECI1 Isoform 1 of Enoyl-CoA delta isomerase 1, mitochondrial      | 1.39 |
| IPI00031522                                            | HADHA Trifunctional enzyme subunit alpha, mitochondrial           | 1.35 |
| IPI00296907                                            | ACOX1 Isoform 1 of Peroxisomal acyl-coenzyme A oxidase 1          | 1.34 |
| IPI00647400                                            | RNPEP Uncharacterized protein                                     | 2.07 |
| IPI00924713                                            | PCYT1A Uncharacterized protein                                    | 0.71 |
| IPI00298406                                            | HADH Isoform 2 of Hydroxyacyl-coenzyme A dehydrogenase, mitoch    | 1.48 |
| IPI00001539                                            | ACAA2 3-ketoacyl-CoA thiolase, mitochondrial                      | 1.43 |
| IPI00019018                                            | TM7SF2 Isoform 1 of Delta(14)-sterol reductase                    | 3.07 |
| IPI00748788                                            | MTM1 Myotubularin                                                 | 2.37 |
| IPI00019169                                            | SH3GL1 endophilin-A2 isoform 1                                    | 1.49 |
| IPI00010415                                            | ACOT7 Isoform 1 of Cytosolic acyl coenzyme A thioester hydrolase  | 1.25 |
| IPI00024971                                            | OSBP Oxysterol-binding protein 1                                  | 1.45 |
| IPI00852983                                            | C8orf38 Isoform 1 of UPF0551 protein C8orf38, mitochondrial       | 1.9  |
| IPI00910962                                            | ELOVL5 cDNA FLJ52813, highly similar to Homo sapiens ELOVL f      | 0.54 |
| IPI00216088                                            | CRABP2 Cellular retinoic acid-binding protein 2                   | 3.37 |
| IPI00464993                                            | AGPAT2 1-acylglycerol-3-phosphate O-acyltransferase 2             | 0.04 |
| IPI00022229                                            | APOB Apolipoprotein B-100                                         | 3.84 |
| IPI00010182                                            | DBI Isoform 1 of Acyl-CoA-binding protein                         | 0.89 |
| IPI00019899                                            | MSMO1 C-4 methylsterol oxidase                                    | 1    |
| IPI00478260                                            | NMT2 Glycylpeptide N-tetradecanoyltransferase                     | 3.11 |
| IPI00024580                                            | MCCC1 Methylcrotonoyl-CoA carboxylase subunit alpha, mitochon     | 1.35 |
| IPI00003807                                            | ACP2 Lysosomal acid phosphatase                                   | 3.98 |
| IPI00396015                                            | ACACA Isoform 4 of Acetyl-CoA carboxylase 1                       | 1.4  |
| IPI00024993                                            | ECHS1 Enoyl-CoA hydratase, mitochondrial                          | 1.38 |
| IPI00026969                                            | SEC23IP Isoform 1 of SEC23-interacting protein                    | 0.98 |
| IPI00021147                                            | DEGS1 Sphingolipid delta(4)-desaturase DES1                       | 3.92 |
| IPI00003861                                            | UGCG Ceramide glucosyltransferase                                 | 3.13 |
| IPI00291419                                            | ACAT2 cDNA FLJ53975, highly similar to Acetyl-CoA acetyltransfer  | 2.5  |
| IPI00784044                                            | MCCC2 Isoform 1 of Methylcrotonoyl-CoA carboxylase beta chain, m  | 1.79 |
| IPI00027032                                            | LYPLA2 Acyl-protein thioesterase 2                                | 1.34 |
| IPI00030363                                            | ACAT1 Acetyl-CoA acetyltransferase, mitochondrial                 | 1.88 |
| IPI00293590                                            | MGLL monoglyceride lipase isoform 1                               | 1.86 |
| IPI00007676                                            | HSD17B12 Estradiol 17-beta-dehydrogenase 12                       | 1.34 |
| IPI00003293                                            | DGKE Diacylglycerol kinase epsilon                                | 2.19 |
| IPI00329692                                            | NMT1 Isoform Long of Glycylpeptide N-tetradecanoyltransferase 1   | 1.72 |
| IPI00028338                                            | EPT1 Ethanolaminephosphotransferase 1                             | 3.07 |
| IPI00030090                                            | ETNK1 Ethanolamine kinase 1                                       |      |
| IPI00019353                                            | AGK Isoform 1 of Acylglycerol kinase, mitochondrial               | 2.85 |
| IPI00020226                                            | ACOX3 Isoform 1 of Peroxisomal acyl-coenzyme A oxidase 3          | 1.58 |
| IPI00908804                                            | ABCD3 cDNA FLJ53353, highly similar to ATP-binding cassette sub   | 1.19 |
| IPI00329410                                            | DOLPP1 Dolichyldiphosphatase 1                                    | 2.21 |
| IPI00011970                                            | HSD17B7 Isoform 1 of 3-keto-steroid reductase                     | 1.54 |
| IPI00784076                                            | PNPLA8 Isoform 1 of Calcium-independent phospholipase A2-gamm     | 1.14 |
| IPI00333143                                            | DGKA Isoform 1 of Diacylglycerol kinase alpha                     | 2.59 |
| IPI00642211                                            | RNPEP Aminopeptidase B                                            | 1.89 |
| IPI00012728                                            | ACSL1 Isoform 1 of Long-chain-fatty-acid--CoA ligase 1            | 1.45 |
| IPI00216164                                            | EHHADH Peroxisomal bifunctional enzyme                            | 2.49 |
| IPI00019407                                            | NSDHL Sterol-4-alpha-carboxylate 3-dehydrogenase, decarboxylating | 1.51 |
| IPI00026781                                            | FASN Fatty acid synthase                                          | 1.3  |
| IPI00219077                                            | LTA4H Isoform 1 of Leukotriene A-4 hydrolase                      | 1.39 |

|             |                                                                      |      |
|-------------|----------------------------------------------------------------------|------|
| IPI00478838 | FAR1 Fatty acyl-CoA reductase 1                                      | 0.83 |
| IPI00412147 | SLC27A4 Long-chain fatty acid transport protein 4                    | 2.23 |
| IPI00549569 | ISYNA1 Isoform 1 of Inositol-3-phosphate synthase 1                  | 1.05 |
| IPI00419802 | HIBCH Isoform 1 of 3-hydroxyisobutyryl-CoA hydrolase, mitochondri    | 1.33 |
| IPI00024623 | ACADSB Short/branched chain specific acyl-CoA dehydrogenase, mi      | 1.25 |
| IPI00221393 | SLC44A1 Isoform 1 of Choline transporter-like protein 1              |      |
| IPI00218465 | PLAA Phospholipase A-2-activating protein                            | 1.37 |
| IPI00549564 | ACSS2 acetyl-coenzyme A synthetase, cytoplasmic isoform 2            | 1.48 |
| IPI00022442 | NDUFAB1 Acyl carrier protein, mitochondrial                          | 1.48 |
| IPI00031397 | ACSL3 Long-chain-fatty-acid--CoA ligase 3                            | 2.24 |
| IPI00646015 | ACOT9 Isoform 4 of Acyl-coenzyme A thioesterase 9, mitochondrial     | 0.99 |
| IPI00022275 | SACM1L Phosphatidylinositide phosphatase SAC1                        | 1.37 |
| IPI00219825 | PSAP Uncharacterized protein                                         | 3.82 |
| IPI00307758 | PITPNM1 Isoform 1 of Membrane-associated phosphatidylinositol tra    | 1.5  |
| IPI00514424 | PPT1 Uncharacterized protein                                         | 1.54 |
| IPI00294501 | DHCR7 7-dehydrocholesterol reductase                                 | 3.29 |
| IPI00028491 | AGPAT5 1-acyl-sn-glycerol-3-phosphate acyltransferase epsilon        | 1.21 |
| IPI00012912 | CPT2 Carnitine O-palmitoyltransferase 2, mitochondrial               | 1.5  |
| IPI00032038 | CPT1A Isoform 1 of Carnitine O-palmitoyltransferase 1, liver isoform | 1.7  |
| IPI00026848 | LRPAP1 Alpha-2-macroglobulin receptor-associated protein             | 1.14 |
| IPI00005107 | NPC1 Niemann-Pick C1 protein                                         | 2.2  |
| IPI00005677 | GNPAT Dihydroxyacetone phosphate acyltransferase                     | 3.72 |
| IPI00008599 | EBP 3-beta-hydroxysteroid-Delta(8),Delta(7)-isomerase                | 4.9  |
| IPI00926253 | CYP20A1 cDNA FLJ59248, highly similar to Homo sapiens cytochro       | 1.4  |
| IPI00217272 | AACS Isoform 1 of Acetoacetyl-CoA synthetase                         | 1.46 |
| IPI00002324 | MAT2B Isoform 1 of Methionine adenosyltransferase 2 subunit beta     | 1.06 |
| IPI00292135 | LBR Lamin-B receptor                                                 | 2.74 |
| IPI00029737 | ACSL4 Isoform Long of Long-chain-fatty-acid--CoA ligase 4            | 1.42 |
| IPI00015388 | PAFAH2 Platelet-activating factor acetylhydrolase 2, cytoplasmic     | 1.99 |
| IPI00028040 | FADS3 Fatty acid desaturase 3                                        | 4.52 |
| IPI00019141 | AGPAT1 1-acyl-sn-glycerol-3-phosphate acyltransferase alpha          | 2.69 |
| IPI00419194 | IAH1 Isoamyl acetate-hydrolyzing esterase 1 homolog                  | 2.45 |
| IPI00022793 | HADHB Trifunctional enzyme subunit beta, mitochondrial               | 1.55 |
| IPI00010400 | PLCB3 1-phosphatidylinositol-4,5-bisphosphate phosphodiesterase be   | 1.07 |
| IPI00784651 | FADS1 fatty acid desaturase 1                                        | 2.75 |
| IPI00028031 | ACADVL cDNA FLJ56425, highly similar to Very-long-chain specifi      | 1.4  |
| IPI00012828 | ACAA1 3-ketoacyl-CoA thiolase, peroxisomal                           | 2.41 |
| IPI00001891 | AUP1 Isoform Long of Ancient ubiquitous protein 1                    | 0.83 |
| IPI00513827 | ACADM Putative uncharacterized protein DKFZp686M24262                | 1.41 |
| IPI00023359 | MCAT Isoform 1 of Malonyl-CoA-acyl carrier protein transacylase, n   | 1.63 |
| IPI00789848 | IVD isovaleryl-CoA dehydrogenase, mitochondrial isoform 1 precurs    | 1    |
| IPI00010187 | ELOVL1 Elongation of very long chain fatty acids protein 1           |      |
| IPI00152981 | ACAD9 Acyl-CoA dehydrogenase family member 9, mitochondrial          | 0.94 |
| IPI00385987 | DAGLB Isoform 1 of Sn1-specific diacylglycerol lipase beta           | 1.2  |
| IPI00027701 | ACADS Short-chain specific acyl-CoA dehydrogenase, mitochondrial     | 1.27 |
| IPI00171459 | HSDL1 Inactive hydroxysteroid dehydrogenase-like protein 1           | 1.21 |
| IPI00006092 | PMM2 Phosphomannomutase 2                                            | 0.88 |
| IPI00059762 | LYPLAL1 Isoform 1 of Lysophospholipase-like protein 1                | 1.82 |
| IPI00007321 | LYPLA1 cDNA FLJ60607, highly similar to Acyl-protein thioesterase    | 1.85 |

---

**KOG category [P] Inorganic ion transport and metabolism**

---

|             |                                                               |      |
|-------------|---------------------------------------------------------------|------|
| IPI00007061 | GOLT1B Vesicle transport protein GOT1B                        | 5.54 |
| IPI00014236 | SLC39A14 Isoform 1 of Zinc transporter ZIP14                  | 3.71 |
| IPI00034277 | ATP13A1 Isoform A of Probable cation-transporting ATPase 13A1 | 1.9  |
| IPI00640276 | EFHA1 EF-hand domain-containing family member A1              | 1.81 |
| IPI00982850 | ATOX1 Uncharacterized protein                                 | 0.96 |
| IPI00554521 | FTH1 Ferritin heavy chain                                     | 3.21 |
| IPI00013466 | ASNA1 ATPase ASNA1                                            | 2.17 |

|             |                                                                            |      |
|-------------|----------------------------------------------------------------------------|------|
| IPI00747849 | ATP1B1 Isoform 1 of Sodium/potassium-transporting ATPase subunit           | 1.33 |
| IPI00002483 | SLC30A1 Zinc transporter 1                                                 | 5.65 |
| IPI01014563 | FTL Ferritin light chain                                                   | 2.28 |
| IPI00216308 | VDAC1 Voltage-dependent anion-selective channel protein 1                  | 1.18 |
| IPI00021695 | ATP2B1 Isoform D of Plasma membrane calcium-transporting ATPase            | 2.88 |
| IPI00022462 | TFRC Transferrin receptor protein 1                                        | 1.74 |
| IPI00008750 | MT1H Metallothionein-1H                                                    | 1.66 |
| IPI00031558 | NUDT9 Isoform 1 of ADP-ribose pyrophosphatase, mitochondrial               | 1.63 |
| IPI00006482 | ATP1A1 Isoform Long of Sodium/potassium-transporting ATPase subunit        | 1.86 |
| IPI00008616 | SLC12A7 Isoform 1 of Solute carrier family 12 member 7                     | 2.87 |
| IPI00921961 | ATP2C1 calcium-transporting ATPase type 2C member 1 isoform 2a             | 2.7  |
| IPI00218733 | SOD1 Superoxide dismutase [Cu-Zn]                                          | 1.96 |
| IPI00021057 | SLC12A4 Isoform 1 of Solute carrier family 12 member 4                     | 1.8  |
| IPI00025340 | PDXP Pyridoxal phosphate phosphatase                                       | 1.49 |
| IPI00008167 | ATP1B3 Sodium/potassium-transporting ATPase subunit beta-3                 | 2.11 |
| IPI00003021 | ATP1A2 Sodium/potassium-transporting ATPase subunit alpha-2                | 1.42 |
| IPI00216026 | VDAC2 Isoform 3 of Voltage-dependent anion-selective channel protein       | 1.46 |
| IPI00477468 | CTR9 RNA polymerase-associated protein CTR9 homolog                        | 1.25 |
| IPI00026824 | HMOX2 Heme oxygenase 2                                                     | 1.49 |
| IPI00219078 | ATP2A2 Isoform 1 of Sarcoplasmic/endoplasmic reticulum calcium ATPase      | 1.23 |
| IPI00465436 | CAT Catalase                                                               | 1.2  |
| IPI00302605 | SLC30A7 Zinc transporter 7                                                 | 4.21 |
| IPI00001960 | CLIC4 Chloride intracellular channel protein 4                             | 2.14 |
| IPI00165506 | POLDIP2 Polymerase delta-interacting protein 2                             | 1.28 |
| IPI00215893 | HMOX1 Heme oxygenase 1                                                     | 7.32 |
| IPI00031804 | VDAC3 Isoform 1 of Voltage-dependent anion-selective channel protein       | 1.37 |
| IPI00022314 | SOD2 Superoxide dismutase [Mn], mitochondrial                              | 3.39 |
| IPI00022649 | SLC12A2 Isoform 1 of Solute carrier family 12 member 2                     | 1.26 |
| IPI00010896 | CLIC1 Chloride intracellular channel protein 1                             | 1.67 |
| IPI00004795 | CLNS1A Methylosome subunit pICln                                           | 0.73 |
| IPI00926820 | SLC4A7 Solute carrier family 4 sodium bicarbonate cotransporter member 4   | 4.3  |
| IPI00909057 | SLC12A1 cDNA FLJ51969, highly similar to Solute carrier family 12 member 1 | 0.17 |
| IPI00293425 | FXN Isoform 1 of Frataxin, mitochondrial                                   | 1.21 |

---

**KOG category [Q] Secondary metabolites biosynthesis, transport and catabolism**

---

|             |                                                                   |      |
|-------------|-------------------------------------------------------------------|------|
| IPI00010706 | GSS Glutathione synthetase                                        | 1.14 |
| IPI00016862 | GSR Isoform Mitochondrial of Glutathione reductase, mitochondrial | 2.53 |
| IPI00029015 | KDSR 3-ketodihydrosphingosine reductase                           | 1.74 |
| IPI00216057 | SORD Sorbitol dehydrogenase                                       | 0.83 |
| IPI00550165 | DHRS7B Dehydrogenase/reductase SDR family member 7B               | 1.96 |
| IPI00011284 | COMT Isoform Membrane-bound of Catechol O-methyltransferase       | 2.73 |
| IPI00177940 | RDH14 Retinol dehydrogenase 14                                    | 1.79 |
| IPI00295386 | CBR1 Carbonyl reductase [NADPH] 1                                 | 1.11 |
| IPI00017469 | SPR Sepiapterin reductase                                         | 1.22 |
| IPI00020226 | ACOX3 Isoform 1 of Peroxisomal acyl-coenzyme A oxidase 3          | 1.58 |
| IPI00006675 | ABCC4 Isoform 1 of Multidrug resistance-associated protein 4      | 1.46 |
| IPI00873506 | GDA Guanine aminohydrolase                                        | 3.34 |
| IPI00295772 | CYP51A1 lanosterol 14-alpha demethylase isoform 1                 | 1.22 |
| IPI00290462 | CBR3 Carbonyl reductase [NADPH] 3                                 | 0.95 |
| IPI00025341 | BDH1 D-beta-hydroxybutyrate dehydrogenase, mitochondrial          | 1.01 |
| IPI00166860 | DHRSX Dehydrogenase/reductase SDR family member on chromosome X   | 1.13 |
| IPI00642041 | COMTD1 Catechol O-methyltransferase domain-containing protein 1   | 1.34 |
| IPI00719178 | ABCC1 Isoform 9 of Multidrug resistance-associated protein 1      | 2.01 |
| IPI00022442 | NDUFAB1 Acyl carrier protein, mitochondrial                       | 1.48 |
| IPI00220014 | IDI1 Isoform 2 of Isopentenyl-diphosphate Delta-isomerase 1       | 1.21 |
| IPI00339384 | RDH11 Isoform 1 of Retinol dehydrogenase 11                       | 1.24 |
| IPI00746777 | ADH5;ADH5P4 Alcohol dehydrogenase class-3                         | 1.25 |
| IPI00006957 | DHRS7 Isoform 1 of Dehydrogenase/reductase SDR family member 7    | 2.12 |



|             |                                                                    |      |
|-------------|--------------------------------------------------------------------|------|
| IPI00329598 | HSD17B11 Estradiol 17-beta-dehydrogenase 11                        | 1.13 |
| IPI00926253 | CYP20A1 cDNA FLJ59248, highly similar to Homo sapiens cytochro 1.4 |      |

---



---

### POORLY CHARACTERIZED

---



---

#### KOG category [R] General function prediction only

---

|             |                                                                        |       |
|-------------|------------------------------------------------------------------------|-------|
| IPI00027166 | TIMP2 Metalloproteinase inhibitor 2                                    | 5.92  |
| IPI00306043 | YTHDF2 Isoform 1 of YTH domain family protein 2                        | 1.05  |
| IPI00654682 | CCNL1 Isoform 1 of Cyclin-L1                                           |       |
| IPI00074893 | ZNF512B Zinc finger protein 512B                                       |       |
| IPI00024502 | UBQLN4 Isoform 1 of Ubiquilin-4                                        | 1.94  |
| IPI00018300 | IFIT1 Interferon-induced protein with tetratricopeptide repeats 1      | 7.84  |
| IPI00013455 | CLIP1 Isoform 1 of CAP-Gly domain-containing linker protein 1          | 1.1   |
| IPI00299526 | SUZ12 Polycomb protein SUZ12                                           | 1.36  |
| IPI00384643 | TP53I3 Isoform 1 of Quinone oxidoreductase PIG3                        | 1.03  |
| IPI00300096 | RAB35 Ras-related protein Rab-35                                       | 1.07  |
| IPI00008557 | IGF2BP1 Insulin-like growth factor 2 mRNA-binding protein 1            | 1.99  |
| IPI00024254 | IFIT3 Interferon-induced protein with tetratricopeptide repeats 3      | 10.26 |
| IPI00023138 | RAC3 Ras-related C3 botulinum toxin substrate 3                        | 1.3   |
| IPI00411614 | WDHD1 WD repeat and HMG-box DNA-binding protein 1                      | 0.83  |
| IPI00301994 | FAHD2B Fumarylacetoacetate hydrolase domain-containing protein 2       | 2.38  |
| IPI00796864 | DPM1 Uncharacterized protein                                           | 1.42  |
| IPI00658045 | SLC2A13 Proton myo-inositol cotransporter                              | 1.76  |
| IPI00015973 | EPB41L2 Band 4.1-like protein 2                                        | 1.66  |
| IPI00023987 | PPCS Phosphopantothenate--cysteine ligase                              | 1.22  |
| IPI00015922 | INTS6 Isoform 1 of Integrator complex subunit 6                        | 0.78  |
| IPI00013909 | AIFM2 Isoform 1 of Apoptosis-inducing factor 2                         | 2.31  |
| IPI00018098 | PRPF38B Isoform 1 of Pre-mRNA-splicing factor 38B                      | 1.42  |
| IPI00413293 | TOR1A cDNA FLJ56343, highly similar to Torsin A                        | 1.11  |
| IPI00013860 | HIBADH 3-hydroxyisobutyrate dehydrogenase, mitochondrial               | 1.8   |
| IPI00856008 | HIGD1A Isoform 2 of HIG1 domain family member 1A                       | 1.68  |
| IPI00382733 | LRRFIP1 Isoform 3 of Leucine-rich repeat flightless-interacting protei | 1.28  |
| IPI00005270 | KDELC1 KDEL motif-containing protein 1                                 | 0.72  |
| IPI00301263 | CAD CAD protein                                                        | 1.09  |
| IPI00031030 | APLP2 Isoform 1 of Amyloid-like protein 2                              | 4.53  |
| IPI00641990 | LAS1L Isoform 1 of Protein LAS1 homolog                                | 1.66  |
| IPI00060181 | EFHD2 EF-hand domain-containing protein D2                             | 1.08  |
| IPI00008998 | PTPLAD1 3-hydroxyacyl-CoA dehydratase 3                                | 2.91  |
| IPI00937477 | WDR43 WD repeat-containing protein 43                                  | 2.17  |
| IPI00169430 | STRBP Isoform 1 of Spermatid perinuclear RNA-binding protein           | 0.9   |
| IPI00871780 | RBM12B RNA-binding protein 12B                                         | 0.8   |
| IPI00219365 | MSN Moesin                                                             | 1.1   |
| IPI00945572 | REPIN1 replication initiator 1 isoform 3                               | 1.45  |
| IPI00385042 | GTPBP4 Nucleolar GTP-binding protein 1                                 | 0.86  |
| IPI01015542 | RND2 Uncharacterized protein                                           | 0.16  |
| IPI00412713 | SAMM50 Sorting and assembly machinery component 50 homolog             | 1.57  |
| IPI00003348 | GNB2 Guanine nucleotide-binding protein G(I)/G(S)/G(T) subunit be      | 1.27  |
| IPI00217477 | HMGB3 High mobility group protein B3                                   | 1.51  |
| IPI00654731 | DDX58 Isoform 1 of Probable ATP-dependent RNA helicase DDX58           | 6.64  |
| IPI00009607 | RAP2C Ras-related protein Rap-2c                                       | 1.98  |
| IPI00305283 | SIAH2 E3 ubiquitin-protein ligase SIAH2                                |       |
| IPI00306406 | RIOK2 Serine/threonine-protein kinase RIO2                             | 1.32  |
| IPI00429538 | YPEL5 Protein yippee-like 5                                            | 1.61  |
| IPI00012756 | IFIT5 Interferon-induced protein with tetratricopeptide repeats 5      | 1.41  |
| IPI00012512 | RRAS2 cDNA FLJ61162, highly similar to Ras-related protein R-Ras       | 0.95  |
| IPI00019988 | SGSH N-sulphoglucosamine sulphohydrolase                               | 2.14  |
| IPI00025244 | ZNF259 Zinc finger protein ZPR1                                        | 1.34  |

|             |                                                                         |      |
|-------------|-------------------------------------------------------------------------|------|
| IPI00016346 | PROSC Proline synthetase co-transcribed homolog (Bacterial), isoform 1  | 1.23 |
| IPI00020883 | HIGD2A HIG1 domain family member 2A                                     | 3.42 |
| IPI00980410 | MTCH2 Uncharacterized protein                                           | 3.2  |
| IPI00334587 | HNRNPAB Isoform 2 of Heterogeneous nuclear ribonucleoprotein A1         | 0.86 |
| IPI00290184 | METTL1 tRNA (guanine-N(7)-)-methyltransferase                           | 1.7  |
| IPI00018298 | IFIT2 Interferon-induced protein with tetratricopeptide repeats 2       | 3.04 |
| IPI00412741 | SFXN4 Isoform 1 of Sideroflexin-4                                       | 2.5  |
| IPI00033022 | DNM2 Isoform 1 of Dynammin-2                                            | 1.27 |
| IPI00396131 | YTHDF3 cDNA FLJ56221, highly similar to YTH domain protein 3            | 0.93 |
| IPI00023101 | RQCD1 Cell differentiation protein RCD1 homolog                         | 1.13 |
| IPI00007811 | CDK4 Cyclin-dependent kinase 4                                          | 1.83 |
| IPI00008351 | SELT Selenoprotein T                                                    | 3.98 |
| IPI00015148 | RAP1B Ras-related protein Rap-1b                                        | 1.15 |
| IPI00018627 | NAA50 Isoform 1 of N-alpha-acetyltransferase 50, NatE catalytic subunit | 1.39 |
| IPI00015011 | FBXL12 Isoform 1 of F-box/LRR-repeat protein 12                         | 1.6  |
| IPI01015840 | UTP18 U3 small nucleolar RNA-associated protein 18 homolog              | 1.42 |
| IPI00332278 | TMEM55B Isoform 2 of Transmembrane protein 55B                          | 2.35 |
| IPI00102059 | SCYL1 Isoform 1 of N-terminal kinase-like protein                       | 1.36 |
| IPI00005202 | PGRMC2 membrane-associated progesterone receptor component 2            | 2.36 |
| IPI00183938 | TTC27 Tetratricopeptide repeat protein 27                               | 0.7  |
| IPI00419258 | HMGB1 High mobility group protein B1                                    | 1.22 |
| IPI00099550 | UBQLN1 Isoform 1 of Ubiquilin-1                                         | 1.01 |
| IPI00607799 | BDH2 Isoform 1 of 3-hydroxybutyrate dehydrogenase type 2                | 3.69 |
| IPI00020418 | RRAS Ras-related protein R-Ras                                          | 2.44 |
| IPI00029444 | C12orf10 UPF0160 protein MYG1, mitochondrial                            | 2    |
| IPI00164610 | TBC1D1 TBC1 domain family member 1                                      | 1.05 |
| IPI00299000 | PA2G4 Proliferation-associated protein 2G4                              | 0.84 |
| IPI00169325 | WDR36 WD repeat-containing protein 36                                   | 1.09 |
| IPI00215965 | HNRNPA1 Isoform A1-B of Heterogeneous nuclear ribonucleoprotein A1      | 0.74 |
| IPI00167949 | MX1 Interferon-induced GTP-binding protein Mx1                          | 4.54 |
| IPI01008793 | RBM10 RNA-binding protein 10 isoform 5                                  | 0.83 |
| IPI00011274 | HNRPDL Isoform 1 of Heterogeneous nuclear ribonucleoprotein D-like      | 0.89 |
| IPI00000792 | CRYZ Quinone oxidoreductase                                             | 1.69 |
| IPI00004337 | ZBTB11 Zinc finger and BTB domain-containing protein 11                 | 1.46 |
| IPI00013297 | PDAP1 28 kDa heat- and acid-stable phosphoprotein                       | 1.18 |
| IPI00026268 | GNB1 Guanine nucleotide-binding protein G(I)/G(S)/G(T) subunit beta     | 1.17 |
| IPI00550308 | RBM12 RNA-binding protein 12                                            | 0.91 |
| IPI01018135 | SAMM50 cDNA FLJ39696 fis, clone SMINT2011033, highly similar to SAMM50  | 2.4  |
| IPI00018364 | RAP2B Ras-related protein Rap-2b                                        | 1.32 |
| IPI00938079 | PDCD6IP programmed cell death 6-interacting protein isoform 2           | 1.04 |
| IPI00216172 | LAMP2 lysosome-associated membrane glycoprotein 2 isoform C precursor   | 4.11 |
| IPI00167638 | GTPBP10 Isoform 1 of GTP-binding protein 10                             | 2.39 |
| IPI00216592 | HNRNPC Isoform C1 of Heterogeneous nuclear ribonucleoproteins C1        | 0.79 |
| IPI00017342 | RHOG Rho-related GTP-binding protein RhoG                               | 1.43 |
| IPI00156689 | VAT1 Synaptic vesicle membrane protein VAT-1 homolog                    | 4.41 |
| IPI00003933 | HAGH Isoform 1 of Hydroxyacylglutathione hydrolase, mitochondrial       | 1.22 |
| IPI00383046 | CMBL Carboxymethylglutaminase homolog                                   | 0.78 |
| IPI00013949 | SGTA Small glutamine-rich tetratricopeptide repeat-containing protein   | 1.36 |
| IPI00020530 | ACOT13 Acyl-coenzyme A thioesterase 13                                  | 2.19 |
| IPI00215997 | CD9 CD9 antigen                                                         | 1.66 |
| IPI00902610 | FHL1 Uncharacterized protein                                            | 1.93 |
| IPI00178072 | SPECC1L Cytospin-A                                                      | 0.79 |
| IPI00303890 | XIAP Baculoviral IAP repeat-containing protein 4                        | 1.02 |
| IPI00002525 | NENF Neudesin                                                           | 1.24 |
| IPI00009931 | HDHD3 Haloacid dehalogenase-like hydrolase domain-containing protein    | 2.24 |
| IPI00743862 | PAAF1 Isoform 1 of Proteasomal ATPase-associated factor 1               | 1.02 |
| IPI00642370 | MPV17L2 Isoform 1 of Mpv17-like protein 2                               | 1.06 |

|             |                                                                       |       |
|-------------|-----------------------------------------------------------------------|-------|
| IPI00016610 | PCBP1 Poly(rC)-binding protein 1                                      | 1.62  |
| IPI00152875 | ZNF384 Isoform 1 of Zinc finger protein 384                           | 0.62  |
| IPI00024097 | TES Isoform 1 of Testin                                               | 2.1   |
| IPI00419373 | HNRNPA3 Isoform 1 of Heterogeneous nuclear ribonucleoprotein A3       | 0.84  |
| IPI00007189 | CDC42 Isoform 1 of Cell division control protein 42 homolog           | 0.91  |
| IPI00026262 | RASA1 Isoform 1 of Ras GTPase-activating protein 1                    | 0.92  |
| IPI00396378 | HNRNPA2B1 Isoform B1 of Heterogeneous nuclear ribonucleoprotein       | 0.79  |
| IPI00013891 | TRA2A Isoform Long of Transformer-2 protein homolog alpha             | 0.8   |
| IPI00010833 | ZNF148 Zinc finger protein 148                                        | 0.8   |
| IPI01013834 | PPME1 44 kDa protein                                                  | 0.94  |
| IPI00001437 | RND3 Rho-related GTP-binding protein RhoE                             | 0.68  |
| IPI00012451 | GNB4 Guanine nucleotide-binding protein subunit beta-4                | 1.13  |
| IPI00604759 | FAHD1 fumarylacetoacetate hydrolase domain-containing protein 1 is    | 2.49  |
| IPI00293946 | UBXN4 UBX domain-containing protein 4                                 | 2.32  |
| IPI00293748 | MINPP1 Isoform 1 of Multiple inositol polyphosphate phosphatase 1     | 1.4   |
| IPI00829865 | TMTC3 Isoform 1 of Transmembrane and TPR repeat-containing pro        | 3.83  |
| IPI00033036 | METAP2 Methionine aminopeptidase 2                                    | 1.02  |
| IPI00386258 | MTCH1 Isoform 1 of Mitochondrial carrier homolog 1                    | 3.1   |
| IPI00218236 | PPP1CB Serine/threonine-protein phosphatase PP1-beta catalytic sub    | 1.2   |
| IPI01021216 | PCBP2 Uncharacterized protein                                         | 7.18  |
| IPI00239815 | CIRH1A Isoform 1 of Cirhin                                            | 1.26  |
| IPI00029513 | NOL10 Isoform 1 of Nucleolar protein 10                               | 1.49  |
| IPI00099986 | FN3KRP Ketosamine-3-kinase                                            | 1.3   |
| IPI00878815 | CHCHD8 Isoform 1 of Coiled-coil-helix-coiled-coil-helix domain-con    | 1.46  |
| IPI00107039 | ABHD6 Monoacylglycerol lipase ABHD6                                   | 1.41  |
| IPI00748151 | ERLEC1 Isoform 1 of Endoplasmic reticulum lectin 1                    | 1.75  |
| IPI00019812 | PPP5C Serine/threonine-protein phosphatase 5                          | 0.83  |
| IPI00376317 | EDC4 Isoform 1 of Enhancer of mRNA-decapping protein 4                | 1.08  |
| IPI00061680 | CCDC101 SAGA-associated factor 29 homolog                             | 0.82  |
| IPI00029605 | GALNS N-acetylgalactosamine-6-sulfatase                               | 2.17  |
| IPI00427242 | FCF1 rRNA-processing protein FCF1 homolog                             | 0.83  |
| IPI00170924 | HINT3 Histidine triad nucleotide-binding protein 3                    | 1.92  |
| IPI00003482 | DECR1 2,4-dienoyl-CoA reductase, mitochondrial                        | 1.54  |
| IPI00007174 | NAA20 N-alpha-acetyltransferase 20, NatB catalytic subunit            | 0.91  |
| IPI00015101 | C9orf167 Torsin family protein C9orf167                               | 2.18  |
| IPI00028888 | HNRNPD Isoform 1 of Heterogeneous nuclear ribonucleoprotein D0        | 0.81  |
| IPI00290979 | ABHD5 1-acylglycerol-3-phosphate O-acyltransferase ABHD5              |       |
| IPI00220152 | BCCIP Isoform 2 of BRCA2 and CDKN1A-interacting protein               | 0.83  |
| IPI00177381 | CWC22 Pre-mRNA-splicing factor CWC22 homolog                          | 1.29  |
| IPI00004308 | FTSJ1 Isoform 1 of Putative ribosomal RNA methyltransferase 1         | 0.65  |
| IPI00464999 | HEATR6 HEAT repeat-containing protein 6                               | 4.17  |
| IPI00788907 | PGAM5 Isoform 1 of Serine/threonine-protein phosphatase PGAM5,        | 10.88 |
| IPI00001618 | RAB39 Ras-related protein Rab-39A                                     | 0.88  |
| IPI00470533 | TMEM120A Isoform 1 of Transmembrane protein 120A                      | 1.79  |
| IPI00217357 | CCAR1 Isoform 1 of Cell division cycle and apoptosis regulator protei | 3.08  |
| IPI00016669 | RHEB GTP-binding protein Rheb                                         | 1.18  |
| IPI00003704 | RBM4;RBM14;RBM14-RBM4 Isoform 1 of RNA-binding protein 4              | 0.95  |
| IPI00878209 | GTPBP5 GTP-binding protein 5                                          |       |
| IPI00031647 | PDCD2L Programmed cell death protein 2-like                           | 1.28  |
| IPI00746301 | CDKL5 Cyclin-dependent kinase-like 5                                  | 1.05  |
| IPI00292548 | RHPN2 Rhophilin-2                                                     | 1.42  |
| IPI00418316 | ZMYND8 cDNA FLJ55380, highly similar to Protein kinase C-bindin       | 1.98  |
| IPI00025341 | BDH1 D-beta-hydroxybutyrate dehydrogenase, mitochondrial              | 1.01  |
| IPI00399089 | MESDC2 LDLR chaperone MESD                                            | 1.53  |
| IPI00290305 | TP53RK TP53-regulating kinase                                         | 1.77  |
| IPI00438923 | CRYZL1 Quinone oxidoreductase-like protein 1                          | 0.93  |
| IPI00900366 | KIAA0564 Isoform 1 of Uncharacterized protein KIAA0564                |       |

|             |                                                                        |      |
|-------------|------------------------------------------------------------------------|------|
| IPI00151358 | CLPTM1L Isoform 1 of Cleft lip and palate transmembrane protein 1-     | 1.63 |
| IPI00847285 | MTG1 Uncharacterized protein                                           | 0.82 |
| IPI00423570 | KRAS Isoform 2B of GTPase KRas                                         | 1.16 |
| IPI00394767 | CA13 Carbonic anhydrase 13                                             | 2.24 |
| IPI00032827 | SF3B14 Pre-mRNA branch site protein p14                                | 0.88 |
| IPI00221002 | PXMP2 Peroxisomal membrane protein 2                                   | 1.78 |
| IPI00939707 | KIAA0664 Protein KIAA0664                                              | 0.77 |
| IPI00298547 | PARK7 Protein DJ-1                                                     | 1.4  |
| IPI00020512 | ALG13 Isoform 2 of UDP-N-acetylglucosamine transferase subunit A       | 0.85 |
| IPI00418313 | ILF3 interleukin enhancer-binding factor 3 isoform d                   | 1.08 |
| IPI00293336 | MBLAC2 Isoform 1 of Metallo-beta-lactamase domain-containing prc       | 1.16 |
| IPI00023529 | CDK6 Cyclin-dependent kinase 6                                         | 0.89 |
| IPI00292326 | SPAG1 Sperm-associated antigen 1                                       | 2.76 |
| IPI01022946 | CHERP 105 kDa protein                                                  | 0.91 |
| IPI00217882 | SORT1 Sortilin                                                         | 1.22 |
| IPI00604624 | NIF3L1 Isoform 1 of NIF3-like protein 1                                | 0.95 |
| IPI00056499 | ZNF622 Zinc finger protein 622                                         | 1.81 |
| IPI00980853 | RHOC Uncharacterized protein                                           | 1.1  |
| IPI00217686 | FTSJ3 Putative rRNA methyltransferase 3                                | 1.06 |
| IPI00014219 | SNX17 Sorting nexin-17                                                 | 3.58 |
| IPI00154614 | ZCRB1 Zinc finger CCHC-type and RNA-binding motif-containing protein 1 |      |
| IPI00647082 | TBC1D13 Isoform 1 of TBC1 domain family member 13                      | 2.05 |
| IPI00017367 | RDX Uncharacterized protein                                            | 0.9  |
| IPI00167098 | PQLC3 PQ-loop repeat-containing protein 3                              | 2.37 |
| IPI00143753 | U2SURP Isoform 1 of U2 snRNP-associated SURP motif-containing p        | 0.92 |
| IPI00014577 | RAB18 Ras-related protein Rab-18                                       | 1.07 |
| IPI00294073 | COQ7 Isoform 1 of Ubiquinone biosynthesis protein COQ7 homolog         | 1.71 |
| IPI00953576 | IGF2BP2 Uncharacterized protein                                        | 1.26 |
| IPI00009111 | TPBG Trophoblast glycoprotein                                          | 4.32 |
| IPI00300094 | LSG1 Large subunit GTPase 1 homolog                                    | 1.26 |
| IPI00013184 | NAA10 N-alpha-acetyltransferase 10, NatA catalytic subunit             | 0.87 |
| IPI00016372 | RAB9A Ras-related protein Rab-9A                                       | 1.9  |
| IPI00154588 | SPPL2A Signal peptide peptidase-like 2A                                | 3.9  |
| IPI00455210 | CHD4 Isoform 2 of Chromodomain-helicase-DNA-binding protein 4          | 0.94 |
| IPI00018768 | TSN Translin                                                           | 1.11 |
| IPI00300805 | LRSAM1 Isoform 1 of E3 ubiquitin-protein ligase LRSAM1                 | 2.52 |
| IPI00008800 | MAZ Similar to Serum amyloid A activating factor 2                     | 2.16 |
| IPI00410693 | SERBP1 SERPINE1 mRNA binding protein 1, isoform CRA_d                  | 0.7  |
| IPI00103654 | PPP4R2 Isoform 1 of Serine/threonine-protein phosphatase 4 regulato    | 1.05 |
| IPI00031679 | C3orf26 Uncharacterized protein C3orf26                                | 1.23 |
| IPI00024320 | RBM3 Putative RNA-binding protein 3                                    | 0.99 |
| IPI00100160 | CAND1 Isoform 1 of Cullin-associated NEDD8-dissociated protein 1       | 1.2  |
| IPI00016560 | ASB6 Ankyrin repeat and SOCS box protein 6                             | 0.88 |
| IPI00005474 | LHPP Isoform 1 of Phospholysine phosphohistidine inorganic pyropho     | 1.77 |
| IPI00916940 | AARSD1 Uncharacterized protein                                         | 0.85 |
| IPI00016912 | TTC1 Tetratricopeptide repeat protein 1                                | 1.16 |
| IPI00219675 | RAC1 Isoform B of Ras-related C3 botulinum toxin substrate 1           | 1.32 |
| IPI00020928 | TFAM Transcription factor A, mitochondrial                             | 0.99 |
| IPI00300127 | NAT10 N-acetyltransferase 10                                           | 1.03 |
| IPI01014295 | RBM7 31 kDa protein                                                    | 1.32 |
| IPI00019269 | WDR61 WD repeat-containing protein 61                                  | 0.99 |
| IPI00171421 | C8orf55 UPF0670 protein C8orf55                                        | 1.21 |
| IPI00074587 | SRSF10;LOC100505793 Isoform 1 of Serine/arginine-rich splicing fa      | 0.76 |
| IPI00026317 | ZBTB7A Zinc finger and BTB domain-containing protein 7A                | 1.39 |
| IPI00068506 | ABCF2 ATP-binding cassette sub-family F member 2 isoform b             | 0.61 |
| IPI00027251 | STK38 Serine/threonine-protein kinase 38                               | 0.98 |
| IPI00003706 | RBMS2 RNA-binding motif, single-stranded-interacting protein 2         | 0.62 |

|             |                                                                                     |       |
|-------------|-------------------------------------------------------------------------------------|-------|
| IPI00006103 | CD2BP2 CD2 antigen cytoplasmic tail-binding protein 2                               | 0.96  |
| IPI00021626 | RBM42 Isoform 1 of RNA-binding protein 42                                           | 4.72  |
| IPI00015897 | CHORDC1 Isoform 1 of Cysteine and histidine-rich domain-containing protein 1        | 0.82  |
| IPI00102069 | EIF3M Eukaryotic translation initiation factor 3 subunit M                          | 0.91  |
| IPI00014263 | EIF4H Isoform Long of Eukaryotic translation initiation factor 4H                   | 0.97  |
| IPI00000041 | RHOB Rho-related GTP-binding protein RhoB                                           | 2.49  |
| IPI00143921 | KDEL2 Isoform 1 of KDEL motif-containing protein 2                                  | 1.32  |
| IPI00908804 | ABCD3 cDNA FLJ53353, highly similar to ATP-binding cassette subfamily 1 member 3    | 1.19  |
| IPI00010190 | DECR2 Isoform 1 of Peroxisomal 2,4-dienoyl-CoA reductase                            | 2.07  |
| IPI00478230 | RBBP5 cDNA FLJ59722, highly similar to Retinoblastoma-binding protein 5             | 1.1   |
| IPI00293167 | SDF2 Stromal cell-derived factor 2                                                  | 1.64  |
| IPI00798277 | GBP3 Guanylate-binding protein 3                                                    | 2.67  |
| IPI00783874 | HDHD2 Isoform 1 of Haloacid dehalogenase-like hydrolase domain-containing protein 2 | 1.98  |
| IPI00018924 | HMG20A Isoform 1 of High mobility group protein 20A                                 | 1.45  |
| IPI00004397 | RALB cDNA FLJ55177, highly similar to Ras-related protein Ral-B                     | 1.65  |
| IPI00106913 | DHRS4 Isoform 1 of Dehydrogenase/reductase SDR family member 4                      | 1.44  |
| IPI00028564 | GBP1 Interferon-induced guanylate-binding protein 1                                 | 3.09  |
| IPI00011913 | HNRNPA0 Heterogeneous nuclear ribonucleoprotein A0                                  | 0.97  |
| IPI00069734 | ZMAT2 Zinc finger matrin-type protein 2                                             | 0.65  |
| IPI00000005 | NRAS GTPase NRas                                                                    | 1     |
| IPI00001564 | CDKN2C Cyclin-dependent kinase 4 inhibitor C                                        | 1.63  |
| IPI00029733 | AKR1C1 Aldo-keto reductase family 1 member C1                                       | 10.18 |
| IPI00022254 | ATG3 Isoform 1 of Ubiquitin-like-conjugating enzyme ATG3                            | 1.62  |
| IPI00016112 | PXDN Isoform 1 of Peroxidase homolog                                                | 3.05  |
| IPI00061623 | SGTB Small glutamine-rich tetratricopeptide repeat-containing protein 1             | 0.83  |
| IPI00478499 | ZNF728 zinc finger protein 208                                                      | 1.77  |
| IPI00009815 | METTL18 Histidine protein methyltransferase 1 homolog                               | 0.68  |
| IPI00305423 | CHMP6 Charged multivesicular body protein 6                                         | 0.98  |
| IPI00399307 | PRCP lysosomal Pro-X carboxypeptidase isoform 2 preproprotein                       | 1.67  |
| IPI00396627 | ELAC2 Isoform 1 of Zinc phosphodiesterase ELAC protein 2                            | 1.28  |
| IPI00020510 | CISD1 CDGSH iron-sulfur domain-containing protein 1                                 | 1.77  |
| IPI00022462 | TFRC Transferrin receptor protein 1                                                 | 1.74  |
| IPI00014513 | YY1 Transcriptional repressor protein YY1                                           | 2.16  |
| IPI00414661 | LARP6 La-related protein 6                                                          | 5.76  |
| IPI01010979 | ZC3H15 Uncharacterized protein                                                      | 1.55  |
| IPI00306057 | RBM38 Isoform 1 of RNA-binding protein 38                                           | 1.58  |
| IPI00787827 | PITRM1 Isoform 2 of Presequence protease, mitochondrial                             | 1.45  |
| IPI00184311 | ENPP1 Ectonucleotide pyrophosphatase/phosphodiesterase family member 1              | 1.65  |
| IPI00027831 | GRWD1 Glutamate-rich WD repeat-containing protein 1                                 | 1.65  |
| IPI00171573 | MCU Isoform 1 of Calcium uniporter protein, mitochondrial                           | 1.25  |
| IPI00641026 | CXXC1 Isoform 2 of CpG-binding protein                                              | 11.16 |
| IPI00788879 | TBC1D23 Isoform 1 of TBC1 domain family member 23                                   | 2.8   |
| IPI00003327 | ARL3 ADP-ribosylation factor-like protein 3                                         | 0.95  |
| IPI00016702 | RABGAP1 Isoform 1 of Rab GTPase-activating protein 1                                | 1.72  |
| IPI01021702 | DNM1L 80 kDa protein                                                                | 0.86  |
| IPI01025117 | CDK2 39 kDa protein                                                                 | 1.64  |
| IPI00419237 | LAP3 Isoform 1 of Cytosol aminopeptidase                                            | 1.69  |
| IPI00015808 | GNL2 Nucleolar GTP-binding protein 2                                                | 0.69  |
| IPI00013043 | TPPP Tubulin polymerization-promoting protein                                       | 1.59  |
| IPI00218187 | PPP1CC Isoform Gamma-2 of Serine/threonine-protein phosphatase F0.6                 | 0.6   |
| IPI00014533 | UBTF Isoform UBF1 of Nucleolar transcription factor 1                               | 1.46  |
| IPI00064193 | TMX3 Isoform 1 of Protein disulfide-isomerase TMX3                                  | 1.17  |
| IPI00006952 | LACTB2 Beta-lactamase-like protein 2                                                | 1.11  |
| IPI00009922 | SLIRP SRA stem-loop-interacting RNA-binding protein, mitochondrial                  | 0.66  |
| IPI00033030 | ADRM1 Proteasomal ubiquitin receptor ADRM1                                          | 1.15  |
| IPI00171856 | DOHH Deoxyhypusine hydroxylase                                                      | 1.2   |
| IPI00871742 | DNM1L Isoform 6 of Dynamin-1-like protein                                           | 1.7   |

|             |                                                                                    |       |
|-------------|------------------------------------------------------------------------------------|-------|
| IPI00299063 | STIM1 Stromal interaction molecule 1                                               | 2.47  |
| IPI00443909 | CNPY2 Isoform 1 of Protein canopy homolog 2                                        | 1.75  |
| IPI00293746 | C1orf35 Isoform 1 of Multiple myeloma tumor-associated protein 2                   | 0.99  |
| IPI00884105 | LAMP1 Lysosome-associated membrane glycoprotein 1                                  | 3.69  |
| IPI00107246 | GTPBP8 Isoform 1 of GTP-binding protein 8                                          |       |
| IPI00043564 | SFXN2 Sideroflexin-2                                                               | 2.62  |
| IPI00291064 | ZFAND1 Isoform 1 of AN1-type zinc finger protein 1                                 | 0.78  |
| IPI00027180 | ZMPSTE24 CAAX prenyl protease 1 homolog                                            | 1.54  |
| IPI00184135 | E4F1 Transcription factor E4F1                                                     | 1.34  |
| IPI00009946 | TOMM34 Mitochondrial import receptor subunit TOM34                                 | 1.57  |
| IPI00026689 | CDK1 Putative uncharacterized protein DKFZp686L20222                               | 0.86  |
| IPI00329385 | MTMR6 Isoform 1 of Myotubularin-related protein 6                                  | 1.15  |
| IPI00107357 | CLPTM1 Isoform 2 of Cleft lip and palate transmembrane protein 1                   | 3.32  |
| IPI00410666 | SCRIB Isoform 3 of Protein scribble homolog                                        | 1.2   |
| IPI00843975 | EZR Ezrin                                                                          | 0.89  |
| IPI00478231 | RHOA Transforming protein RhoA                                                     | 1.02  |
| IPI00156005 | NOVA2 RNA-binding protein Nova-2                                                   | 2.13  |
| IPI00004968 | PRPF19 Pre-mRNA-processing factor 19                                               | 1.24  |
| IPI00872292 | IFT27 Isoform 1 of Intraflagellar transport protein 27 homolog                     | 2.11  |
| IPI00550451 | PPP1CA Serine/threonine-protein phosphatase PP1-alpha catalytic subunit            | 1.05  |
| IPI00163496 | PPFIA1 Isoform 1 of Liprin-alpha-1                                                 | 1.24  |
| IPI00097492 | ZNF512 Zinc finger protein 512                                                     | 1.3   |
| IPI00658000 | IGF2BP3 Isoform 1 of Insulin-like growth factor 2 mRNA-binding protein 2           |       |
| IPI00746655 | ESYT1 Isoform 2 of Extended synaptotagmin-1                                        | 1.71  |
| IPI00010349 | AGPS Alkyldihydroxyacetonephosphate synthase, peroxisomal                          | 1.41  |
| IPI00744627 | PECR Peroxisomal trans-2-enoyl-CoA reductase                                       | 1.56  |
| IPI00871988 | SFXN3 cDNA FLJ58980, highly similar to Sideroflexin-3                              | 2.2   |
| IPI00306280 | DENR Density-regulated protein                                                     | 1.19  |
| IPI00011511 | CECR5 Isoform 2 of Cat eye syndrome critical region protein 5                      | 1.32  |
| IPI00375631 | ISG15 Ubiquitin-like protein ISG15                                                 | 10.35 |
| IPI00000686 | RBM19 Probable RNA-binding protein 19                                              | 0.78  |
| IPI00514550 | DNM2 dynamin-2 isoform 2                                                           | 1.13  |
| IPI00012066 | PCBP2 poly(rC)-binding protein 2 isoform b                                         | 1.79  |
| IPI00413140 | DNM1 Isoform 1 of Dynamin-1                                                        | 1.74  |
| IPI01022506 | EIF4B cDNA FLJ54492, highly similar to Eukaryotic translation initiation factor 4B | 1.04  |
| IPI00217519 | RALA Ras-related protein Ral-A                                                     | 1.01  |
| IPI00011268 | RALY cDNA FLJ77422, highly similar to Homo sapiens RNA binding protein 1           | 0.91  |
| IPI00010873 | WRB Tryptophan-rich protein                                                        | 3.03  |
| IPI00020128 | UTP6 U3 small nucleolar RNA-associated protein 6 homolog                           | 0.91  |
| IPI00019345 | RAP1A Ras-related protein Rap-1A                                                   | 1.11  |
| IPI00328847 | NAA40 N-alpha-acetyltransferase 40, NatD catalytic subunit                         | 0.96  |
| IPI00301503 | TRA2B Isoform 1 of Transformer-2 protein homolog beta                              | 0.74  |
| IPI00219097 | HMGB2 High mobility group protein B2                                               | 1.57  |
| IPI00909484 | cDNA FLJ54776, highly similar to Cell division control protein 42 homolog 2        | 2.94  |
| IPI00032533 | WDR18 WD repeat-containing protein 18                                              | 1.04  |
| IPI00550440 | C2orf18 Transmembrane protein C2orf18                                              | 4.05  |
| IPI00003766 | ETHE1 Protein ETHE1, mitochondrial                                                 | 1.29  |
| IPI00005492 | WDR5 WD repeat-containing protein 5                                                | 1.53  |
| IPI00060031 | ARL8A ADP-ribosylation factor-like protein 8A                                      | 3.09  |
| IPI00413641 | AKR1B1 Aldose reductase                                                            | 2.89  |
| IPI00395462 | C15orf63 Isoform 2 of Huntingtin-interacting protein K                             | 0.84  |
| IPI00925806 | ZDHHC3 Uncharacterized protein                                                     | 2.74  |
| IPI00003833 | MTCH2 Mitochondrial carrier homolog 2                                              | 2.19  |
| IPI00102580 | MTMR9 Myotubularin-related protein 9                                               | 0.99  |
| IPI00220271 | AKR1A1 Alcohol dehydrogenase [NADP+]                                               | 2.19  |
| IPI00306380 | SNORD19B;GNL3 Isoform 1 of Guanine nucleotide-binding protein-10.87                |       |
| IPI00793209 | UBL7 Ubiquitin-like 7 (Bone marrow stromal cell-derived), isoform C                | 0.93  |

|             |                                                                       |       |
|-------------|-----------------------------------------------------------------------|-------|
| IPI00930718 | ZMYND11 zinc finger MYND domain-containing protein 11 isoform         | 1.38  |
| IPI00000948 | TBL2 Transducin beta-like protein 2                                   | 0.89  |
| IPI00549389 | METTL11A Conserved hypothetical protein                               | 1.34  |
| IPI00220739 | PGRMC1 Membrane-associated progesterone receptor component 1          | 2.36  |
| IPI00024255 | GPKOW G patch domain and KOW motifs-containing protein                | 2.47  |
| IPI00216746 | HNRNPK Isoform 2 of Heterogeneous nuclear ribonucleoprotein K         | 1.05  |
| IPI00001757 | RBM8A Isoform 1 of RNA-binding protein 8A                             | 0.69  |
| IPI00297723 | RBM6 RNA-binding protein 6                                            | 0.69  |
| IPI00215999 | CDK11B Isoform SV9 of Cyclin-dependent kinase 11B                     | 1.14  |
| IPI00217069 | RPS6KB2 Ribosomal protein S6 kinase beta-2                            | 1.71  |
| IPI00217240 | WDR75 WD repeat-containing protein 75                                 | 0.87  |
| IPI00165026 | SETD3 Isoform 1 of Histone-lysine N-methyltransferase setd3           | 0.86  |
| IPI00061528 | KTI12 Protein KTI12 homolog                                           | 1.46  |
| IPI00154590 | MKI67IP MKI67 FHA domain-interacting nucleolar phosphoprotein 1       | 1     |
| IPI00012235 | NDFIP1 Isoform 1 of NEDD4 family-interacting protein 1                | 11.11 |
| IPI00807545 | HNRNPK Isoform 3 of Heterogeneous nuclear ribonucleoprotein K         | 1.46  |
| IPI00005132 | GNL3L Guanine nucleotide-binding protein-like 3-like protein          | 0.83  |
| IPI00007755 | RAB21 Ras-related protein Rab-21                                      | 1.21  |
| IPI00012336 | ZFX ZFX protein                                                       | 0.7   |
| IPI00215890 | ZNF22 Zinc finger protein 22                                          | 0.86  |
| IPI00009841 | EWSR1 RNA-binding protein EWS isoform 1                               | 1.08  |
| IPI00018208 | TTC33 Tetratricopeptide repeat protein 33                             | 0.87  |
| IPI00294426 | TAF15 Isoform Long of TATA-binding protein-associated factor 2N       | 0.76  |
| IPI00016703 | DHCR24 Delta(24)-sterol reductase                                     | 3.66  |
| IPI00179415 | PPP3CA Isoform 1 of Serine/threonine-protein phosphatase 2B catalytic | 1.08  |
| IPI00019642 | CLIP2 Isoform 1 of CAP-Gly domain-containing linker protein 2         | 1.69  |
| IPI00375144 | SRRT Isoform 1 of Serrate RNA effector molecule homolog               | 0.95  |
| IPI00102752 | RBM15 Isoform 1 of Putative RNA-binding protein 15                    | 1.43  |
| IPI00640818 | PNPLA6 neuropathy target esterase isoform a                           | 2.14  |
| IPI00019046 | RBM22 Isoform 1 of Pre-mRNA-splicing factor RBM22                     | 1.26  |
| IPI00306661 | KCMF1 E3 ubiquitin-protein ligase KCMF1                               | 1.27  |
| IPI00000006 | HRAS Isoform 1 of GTPase HRas                                         | 1     |
| IPI00514619 | MEMO1;MEMO1P1 Uncharacterized protein                                 | 1.41  |
| IPI00306749 | SLC4A1AP Kanadaptin                                                   | 0.75  |
| IPI00031612 | UTP23 Isoform 1 of rRNA-processing protein UTP23 homolog              | 0.91  |
| IPI00470498 | SERBP1 Isoform 3 of Plasminogen activator inhibitor 1 RNA-binding     | 0.5   |
| IPI00007089 | NSA2 Ribosome biogenesis protein NSA2 homolog                         | 0.82  |
| IPI00396387 | GNL1 Isoform 1 of Guanine nucleotide-binding protein-like 1           | 1.9   |
| IPI00306689 | NADSYN1 Glutamine-dependent NAD(+) synthetase                         | 1.05  |
| IPI00234793 | KCTD15 cDNA FLJ61112, highly similar to BTB/POZ domain-containing     | 0.86  |
| IPI00046828 | CCDC58 Coiled-coil domain-containing protein 58                       | 1.26  |
| IPI00012448 | CLN3 Isoform 1 of Battenin                                            | 1.11  |
| IPI00409659 | UBQLN2 Ubiquilin-2                                                    | 2.41  |
| IPI00940864 | PHF10 Isoform 1 of PHD finger protein 10                              | 1     |
| IPI00169267 | ATL2 Isoform 1 of Atlantin-2                                          | 2.86  |
| IPI00027988 | CTCF Transcriptional repressor CTCF                                   | 1.12  |
| IPI00060569 | ABHD12 Isoform 2 of Monoacylglycerol lipase ABHD12                    | 2.08  |
| IPI00306087 | WRAP53 Telomerase Cajal body protein 1                                | 1.3   |
| IPI00218095 | BIRC5 Isoform 2 of Baculoviral IAP repeat-containing protein 5        | 6.4   |
| IPI00165616 | SENPA8 Sentrin-specific protease 8                                    | 1.93  |
| IPI00974191 | FYCO1 Uncharacterized protein                                         | 1.48  |
| IPI00006608 | APP Isoform APP770 of Amyloid beta A4 protein (Fragment)              | 4.13  |
| IPI00219446 | PEBP1 Phosphatidylethanolamine-binding protein 1                      | 2.05  |
| IPI00293350 | TSNAX Translin-associated protein X                                   | 1.03  |
| IPI00024684 | MX2 Interferon-induced GTP-binding protein Mx2                        | 9.64  |
| IPI00916847 | OLA1 47 kDa protein                                                   | 1.65  |
| IPI00872352 | HDHC2 Isoform 1 of HD domain-containing protein 2                     | 1.18  |

| <b>KOG category</b> | <b>[S] Function unknown</b>                                             |      |
|---------------------|-------------------------------------------------------------------------|------|
| IPI00016532         | C4orf27 UPF0609 protein C4orf27                                         | 0.96 |
| IPI00020515         | USE1 Isoform 1 of Vesicle transport protein USE1                        | 0.94 |
| IPI00413817         | SERINC1 Serine incorporator 1                                           | 3.85 |
| IPI00011702         | TTI1 TEL2-interacting protein 1 homolog                                 | 0.7  |
| IPI00032849         | NOP16 Nucleolar protein 16                                              | 1.29 |
| IPI00059912         | SKA1 Isoform 1 of Spindle and kinetochore-associated protein 1          | 0.4  |
| IPI00410091         | C11orf73 Uncharacterized protein C11orf73                               | 1.49 |
| IPI00549239         | PUS7L Pseudouridylate synthase 7 homolog-like protein                   | 0.91 |
| IPI00014298         | PWP1 Periodic tryptophan protein 1 homolog                              | 0.99 |
| IPI00031651         | C7orf50 Uncharacterized protein C7orf50                                 | 2.88 |
| IPI00009009         | CWC15 Protein CWC15 homolog                                             | 1.04 |
| IPI00307547         | C9orf46 Transmembrane protein C9orf46                                   | 1.46 |
| IPI00166130         | PPPDE2 PPPDE peptidase domain-containing protein 2                      | 0.78 |
| IPI00001710         | C11orf2 Isoform 1 of Protein fat-free homolog                           | 1.01 |
| IPI00026307         | CDC40 Pre-mRNA-processing factor 17                                     | 1.02 |
| IPI00075081         | FANCD2 Isoform 1 of Fanconi anemia group D2 protein                     | 0.71 |
| IPI00307572         | TMEM165 Transmembrane protein 165                                       |      |
| IPI00245135         | RNASEH2B Uncharacterized protein                                        | 1.5  |
| IPI00828125         | SMPD4 Isoform 4 of Sphingomyelin phosphodiesterase 4                    | 1.16 |
| IPI00006606         | MRPS26 28S ribosomal protein S26, mitochondrial                         | 0.9  |
| IPI00394809         | APOOL Apolipoprotein O-like                                             | 1.84 |
| IPI00290085         | CDH2 Cadherin-2                                                         | 1.37 |
| IPI00168479         | APOA1BP cDNA FLJ56357, highly similar to Homo sapiens apolipoprotein A1 | 4.43 |
| IPI00607651         | FAM40B Family with sequence similarity 40, member B                     | 0.91 |
| IPI00024167         | ESF1 ESF1 homolog                                                       | 0.7  |
| IPI00383163         | THYN1 Isoform 1 of Thymocyte nuclear protein 1                          | 1.48 |
| IPI00163381         | LEPRE1 Isoform 1 of Prolyl 3-hydroxylase 1                              | 1.57 |
| IPI00003318         | ZNHIT2 Zinc finger HIT domain-containing protein 2                      | 1.13 |
| IPI00301421         | ZC3HC1 Isoform 1 of Nuclear-interacting partner of ALK                  | 0.75 |
| IPI00555597         | PTRH2 cDNA FLJ32471 fis, clone SKNMC2000322, highly similar to PTRH1    | 1.25 |
| IPI00514311         | CTTNBP2NL CTTNBP2 N-terminal-like protein                               | 1.97 |
| IPI00007024         | FAM96B Mitotic spindle-associated MMXD complex subunit MIP18            | 2.27 |
| IPI00927731         | AAMP Uncharacterized protein                                            | 1.75 |
| IPI00005670         | CDC123 Cell division cycle protein 123 homolog                          | 0.68 |
| IPI00101600         | CWF19L1 Isoform 1 of CWF19-like protein 1                               | 1.06 |
| IPI00290410         | DNTTIP2 Deoxynucleotidyltransferase terminal-interacting protein 2      | 0.79 |
| IPI00042580         | APOO Isoform 1 of Apolipoprotein O                                      | 1.92 |
| IPI00022277         | CCDC56 Coiled-coil domain-containing protein 56                         | 1.43 |
| IPI00329600         | SCCPDH Probable saccharopine dehydrogenase                              | 2.24 |
| IPI00783359         | CISD3 CDGSH iron-sulfur domain-containing protein 3, mitochondrial      | 1.93 |
| IPI00014149         | TTC35 Tetratricopeptide repeat protein 35                               | 1.1  |
| IPI00550191         | C9orf78 Uncharacterized protein C9orf78                                 | 0.64 |
| IPI00953712         | KIAA1715 Uncharacterized protein                                        | 2.49 |
| IPI00024283         | WDFY1 WD repeat and FYVE domain-containing protein 1                    | 4.87 |
| IPI00872492         | C3orf75 Isoform 1 of UPF0405 protein C3orf75                            | 1.41 |
| IPI00646689         | TXNDC17 Thioredoxin domain-containing protein 17                        | 1.22 |
| IPI00063729         | THOC3 THO complex subunit 3                                             | 0.82 |
| IPI00549540         | PAK1IP1 p21-activated protein kinase-interacting protein 1              | 0.79 |
| IPI00002270         | C6orf211 UPF0364 protein C6orf211                                       | 2.44 |
| IPI00292894         | TSR1 Pre-rRNA-processing protein TSR1 homolog                           | 1.36 |
| IPI00016046         | ROMO1 Isoform 1 of Reactive oxygen species modulator 1                  | 5.62 |
| IPI00783781         | NUP205 Nuclear pore complex protein Nup205                              | 0.96 |
| IPI00968228         | OSTCP1;OSTC Uncharacterized protein                                     | 4.46 |
| IPI00024618         | C3orf37 UPF0361 protein C3orf37                                         |      |
| IPI00328306         | LOC441155;ZC3H11A Zinc finger CCCH domain-containing protein 2          | 2.84 |
| IPI00007166         | IER3IP1 Immediate early response 3-interacting protein 1                | 1.41 |



|             |                                                                     |      |
|-------------|---------------------------------------------------------------------|------|
| IPI00031655 | VPS25 Vacuolar protein-sorting-associated protein 25                | 1.08 |
| IPI00018192 | WDR74 Isoform 1 of WD repeat-containing protein 74                  | 2.3  |
| IPI00299417 | THOC5 THO complex subunit 5 homolog                                 | 0.65 |
| IPI00166483 | C17orf61 UPF0451 protein C17orf61                                   | 1.89 |
| IPI00165361 | DCUN1D5 DCN1-like protein 5                                         | 0.99 |
| IPI00025718 | WDR4 Isoform 1 of tRNA (guanine-N(7)-)-methyltransferase subunit    | 1.36 |
| IPI00017592 | LETM1 Isoform 1 of LETM1 and EF-hand domain-containing proteir      | 1.13 |
| IPI00032561 | CAB39 Calcium-binding protein 39                                    | 0.83 |
| IPI00007730 | C14orf1 Probable ergosterol biosynthetic protein 28                 | 2.91 |
| IPI00761082 | CENPV Isoform 1 of Centromere protein V                             | 1.12 |
| IPI00943357 | GOLGA2 Isoform 1 of Golgin subfamily A member 2                     | 0.95 |
| IPI00549236 | CCDC90B Isoform 1 of Coiled-coil domain-containing protein 90B, n   | 1.45 |
| IPI00034010 | RWDD1 RWD domain-containing protein 1                               | 1.14 |
| IPI00297241 | URB1 Nucleolar pre-ribosomal-associated protein 1                   | 0.97 |
| IPI00007004 | RRP15 RRP15-like protein                                            | 1.08 |
| IPI00478450 | NDUFB11 Isoform 2 of NADH dehydrogenase [ubiquinone] 1 beta su      | 1.66 |
| IPI00855954 | INO80C INO80 complex subunit C isoform 1                            | 1.04 |
| IPI00152441 | HM13 Isoform 1 of Minor histocompatibility antigen H13              | 2.84 |
| IPI00149375 | FAM160A2 Isoform 2 of FTS and Hook-interacting protein              | 1.74 |
| IPI00299084 | TMEM33 Transmembrane protein 33                                     | 1.12 |
| IPI00152890 | NOL6 Isoform 1 of Nucleolar protein 6                               | 2.09 |
| IPI00444371 | WDR44 Isoform 1 of WD repeat-containing protein 44                  | 1.98 |
| IPI00022832 | BRP44 Brain protein 44                                              | 2.09 |
| IPI00152998 | LRRC40 Leucine-rich repeat-containing protein 40                    | 1.65 |
| IPI00002926 | VPS37B Vacuolar protein sorting-associated protein 37B              | 1.37 |
| IPI00022002 | MRPS27 cDNA FLJ54536, highly similar to Mitochondrial 28S riboso    | 1.03 |
| IPI00183657 | ZNF706 Zinc finger protein 706                                      | 0.79 |
| IPI00072044 | C11orf54 Isoform 1 of Ester hydrolase C11orf54                      | 4.24 |
| IPI00031106 | PSMG3 Proteasome assembly chaperone 3                               | 1.62 |
| IPI00179019 | MRPL35 Isoform 1 of 39S ribosomal protein L35, mitochondrial        | 1.09 |
| IPI00064739 | THEM4 Thioesterase superfamily member 4                             | 0.83 |
| IPI00335385 | DCPS Scavenger mRNA-decapping enzyme DcpS                           | 1.23 |
| IPI00305296 | C12orf44 Autophagy-related protein 101                              | 0.4  |
| IPI00412785 | BRP44L Brain protein 44-like protein                                | 0.93 |
| IPI00154915 | PARD3 Isoform 1 of Partitioning defective 3 homolog                 | 2.33 |
| IPI00024642 | CCDC47 Isoform 1 of Coiled-coil domain-containing protein 47        | 1.04 |
| IPI00178750 | FAM192BP;FAM192A Protein FAM192A                                    | 0.57 |
| IPI00030985 | FAM96A MIP18 family protein FAM96A                                  | 1.08 |
| IPI00291893 | DCUN1D1 DCN1-like protein 1                                         | 0.9  |
| IPI00009542 | MAGED2 Isoform 1 of Melanoma-associated antigen D2                  | 0.99 |
| IPI00010427 | TMEM93 Transmembrane protein 93                                     | 1.88 |
| IPI00004290 | DIEXF Digestive organ expansion factor homolog                      | 0.97 |
| IPI00651738 | ADI1 Isoform 1 of 1,2-dihydroxy-3-keto-5-methylthiopentene dioxyge  | 0.68 |
| IPI00177428 | CHCHD4 Isoform 2 of Mitochondrial intermembrane space import an     | 0.78 |
| IPI00032848 | CCDC53 WASH complex subunit CCDC53                                  | 1.13 |
| IPI00005667 | N4BP1 NEDD4-binding protein 1                                       | 9.62 |
| IPI00889000 | NCDN Isoform 3 of Neurochondrin                                     | 1.19 |
| IPI00010219 | SPC25 Kinetochore protein Spc25                                     | 0.73 |
| IPI00013195 | MRPL49 39S ribosomal protein L49, mitochondrial                     | 1.22 |
| IPI00186721 | GOPC Isoform 1 of Golgi-associated PDZ and coiled-coil motif-contai | 1.17 |
| IPI00218728 | PAFAH1B1 Isoform 1 of Platelet-activating factor acetylhydrolase IB | 1.48 |
| IPI00168567 | TMEM188 Isoform 2 of Transmembrane protein 188                      | 3.41 |
| IPI00016559 | THG1L Probable tRNA(His) guanylyltransferase                        | 1.63 |
| IPI00747787 | NCAPD3 Condensin-2 complex subunit D3                               | 0.95 |
| IPI00877014 | GDAP1 Isoform 1 of Ganglioside-induced differentiation-associated p | 1.81 |
| IPI00744558 | C19orf63 28 kDa protein                                             | 1.22 |
| IPI00555703 | TMEM41B Isoform 1 of Transmembrane protein 41B                      | 2.92 |

|             |                                                                    |       |
|-------------|--------------------------------------------------------------------|-------|
| IPI00640902 | ZBTB8OS cDNA FLJ75987, highly similar to Homo sapiens zinc fing    | 1.53  |
| IPI00807498 | CCDC6 CCDC6 protein (Fragment)                                     | 1.31  |
| IPI00478758 | MCMBP Isoform 1 of Mini-chromosome maintenance complex-bindin      | 0.62  |
| IPI00007607 | YIF1A Protein YIF1A                                                | 2.39  |
| IPI00024551 | C15orf24 UPF0480 protein C15orf24                                  | 2.03  |
| IPI00383684 | PPPDE1 Isoform 1 of PPPDE peptidase domain-containing protein 1    | 2.14  |
| IPI00016014 | ITM2C Isoform 1 of Integral membrane protein 2C                    | 4.15  |
| IPI00031581 | WDR83 WD repeat domain-containing protein 83                       | 0.81  |
| IPI00030706 | AHSA1 Activator of 90 kDa heat shock protein ATPase homolog 1      | 1.35  |
| IPI00299387 | TIMMDC1 Translocase of inner mitochondrial membrane domain-co      | 1.14  |
| IPI00007673 | CHCHD2 Coiled-coil-helix-coiled-coil-helix domain-containing prote | 1.52  |
| IPI00939419 | NLE1 cDNA FLJ58655, highly similar to Notchless homolog 1          | 0.66  |
| IPI00304264 | DERL2 Derlin-2                                                     | 10.39 |
| IPI00218962 | C20orf43 Uncharacterized protein                                   | 1.26  |
| IPI00010404 | SF3B5 Splicing factor 3B subunit 5                                 | 0.79  |
| IPI00925918 | CCDC12 coiled-coil domain-containing protein 12                    | 1.12  |
| IPI00005511 | PHF5A PHD finger-like domain-containing protein 5A                 | 0.95  |
| IPI00107113 | UTP14A Isoform 1 of U3 small nucleolar RNA-associated protein 14   | 1.39  |
| IPI00020472 | TMEM111 Isoform 1 of Transmembrane protein 111                     | 1.81  |
| IPI00419575 | GET4 Uncharacterised protein family UPF0363 protein                | 0.93  |
| IPI00007067 | GLIPR2 Golgi-associated plant pathogenesis-related protein 1       | 2.82  |
| IPI00174442 | FAM98A Isoform 1 of Protein FAM98A                                 | 0.85  |
| IPI00030098 | FAM50A Protein FAM50A                                              | 1     |
| IPI00154668 | CCDC93 Coiled-coil domain-containing protein 93                    | 1.13  |
| IPI00642584 | KIAA0090 Isoform 1 of Uncharacterized protein KIAA0090             | 2.19  |
| IPI00306439 | C18orf55 TIM21-like protein, mitochondrial                         | 0.97  |
| IPI00023064 | NDUFAF4 NADH dehydrogenase [ubiquinone] 1 alpha subcomplex a       | 1.26  |
| IPI00642611 | COG6 cDNA FLJ56431, highly similar to Conserved oligomeric Golg    | 1.29  |
| IPI00025753 | DSG1 Desmoglein-1                                                  |       |
| IPI00376478 | CMC1 COX assembly mitochondrial protein homolog                    | 2.1   |
| IPI00003527 | SLC9A3R1 Na(+)/H(+) exchange regulatory cofactor NHE-RF1           | 1.83  |
| IPI00001661 | RCC1 Isoform 2 of Regulator of chromosome condensation             | 0.92  |
| IPI00013271 | DERL1 Isoform 1 of Derlin-1                                        | 1.38  |
| IPI00641523 | PDZD11 Isoform 2 of PDZ domain-containing protein 11               | 4.93  |
| IPI00550995 | PIH1D1 PIH1 domain-containing protein 1                            | 0.82  |
| IPI00740961 | INTS1 DKFZP586J0619 protein                                        | 1.05  |
| IPI00550069 | RNH1 Ribonuclease inhibitor                                        | 1.68  |
| IPI00742682 | TPR Nucleoprotein TPR                                              | 0.9   |
| IPI00018196 | NLE1 Isoform 1 of Notchless protein homolog 1                      | 0.81  |
| IPI00103554 | GATAD2B Transcriptional repressor p66-beta                         | 0.95  |
| IPI00002408 | RPAP3 Isoform 1 of RNA polymerase II-associated protein 3          | 0.69  |
| IPI00009346 | TMEM14C Transmembrane protein 14C                                  | 2.32  |
| IPI00059944 | RNF25 E3 ubiquitin-protein ligase RNF25                            | 0.85  |
| IPI00009364 | ORMDL1 ORM1-like protein 1                                         | 4.12  |
| IPI00031615 | LLPH Protein LLP homolog                                           | 2.37  |
| IPI00029175 | KIAA0196 WASH complex subunit strumpellin                          | 2.15  |
| IPI00025178 | BCAS2 Pre-mRNA-splicing factor SPF27                               | 0.77  |
| IPI00063219 | NAF1 H/ACA ribonucleoprotein complex non-core subunit NAF1         | 1.05  |
| IPI00915263 | C6orf203 hypothetical protein LOC51250 isoform b                   | 1.14  |
| IPI00217362 | TPRKB Isoform 3 of TP53RK-binding protein                          | 1.07  |
| IPI00006754 | DCAF7 DDB1- and CUL4-associated factor 7                           | 1.73  |
| IPI00295066 | MRPL48 39S ribosomal protein L48, mitochondrial                    | 0.8   |
| IPI00867714 | LSM12 Isoform 2 of Protein LSM12 homolog                           | 1.37  |
| IPI00413659 | ALKBH5 Isoform 2 of Probable alpha-ketoglutarate-dependent dioxyg  | 1.83  |
| IPI00060627 | CCDC124 Coiled-coil domain-containing protein 124                  | 1.02  |
| IPI00797537 | NUDCD1 Isoform 1 of NudC domain-containing protein 1               | 1.28  |
| IPI00641124 | DCUN1D4 cDNA FLJ55777, highly similar to DCN1-like protein 4       | 1.05  |

|             |                                                                    |      |
|-------------|--------------------------------------------------------------------|------|
| IPI00009335 | FAM203A Protein FAM203A                                            | 2.48 |
| IPI00550689 | C22orf28 tRNA-splicing ligase RtcB homolog                         | 1.4  |
| IPI00026111 | TMCO1 Isoform 1 of Transmembrane and coiled-coil domain-contain    | 3.97 |
| IPI00018026 | BSDC1 Isoform 3 of BSD domain-containing protein 1                 | 0.93 |
| IPI00180454 | UTP11L Probable U3 small nucleolar RNA-associated protein 11       | 0.86 |
| IPI00028931 | DSG2 Desmoglein-2                                                  | 3.85 |
| IPI00411705 | SPRYD7 Isoform 1 of SPRY domain-containing protein 7               | 1.3  |
| IPI00549664 | TEX10 Testis-expressed sequence 10 protein                         | 1.81 |
| IPI00045939 | ADO 2-aminoethanethiol dioxygenase                                 | 2    |
| IPI00060107 | CHCHD1 Coiled-coil-helix-coiled-coil-helix domain-containing prote | 1.69 |
| IPI00844214 | CTNBL1 Isoform 1 of Beta-catenin-like protein 1                    | 0.96 |
| IPI00045764 | TMEM209 Isoform 1 of Transmembrane protein 209                     | 1.96 |
| IPI00893067 | EML4 Uncharacterized protein                                       | 1.71 |
| IPI00893172 | GIN3 DNA replication complex GINS protein PSF3 isoform a           | 0.5  |
| IPI00157215 | C19orf52 Uncharacterized protein C19orf52                          | 1.38 |
| IPI00006547 | ITFG1 T-cell immunomodulatory protein                              | 1.61 |
| IPI00007146 | GIN2 DNA replication complex GINS protein PSF2                     | 0.96 |
| IPI01019005 | ATXN10 Ataxin-10                                                   | 0.79 |
| IPI00217918 | ELMOD2 ELMO domain-containing protein 2                            | 1.19 |
| IPI00009010 | TRMT112 tRNA methyltransferase 112 homolog                         | 1.43 |
| IPI00300060 | WDR70 WD repeat-containing protein 70                              | 0.99 |
| IPI00170786 | WBP11 WW domain-binding protein 11                                 | 2.41 |
| IPI00217104 | NDNL2 Melanoma-associated antigen G1                               | 0.77 |
| IPI00329591 | RMND1 Isoform 1 of Required for meiotic nuclear division protein 1 | 2.36 |
| IPI00748502 | CRTAP Cartilage-associated protein                                 | 0.98 |
| IPI00418229 | C9orf114 Uncharacterized protein                                   | 0.67 |
| IPI00030274 | NSRP1 Nuclear speckle splicing regulatory protein 1                | 0.65 |
| IPI00101186 | RRP12 Isoform 1 of RRP12-like protein                              | 1.12 |
| IPI00009320 | TMEM85 Isoform 1 of Transmembrane protein 85                       | 1.36 |
| IPI00298991 | KIAA1033 KIAA1033 protein                                          | 1.56 |
| IPI00063334 | TMEM41A Transmembrane protein 41A                                  | 3.02 |
| IPI00477040 | NUP188 Isoform 1 of Nucleoporin NUP188 homolog                     | 1.05 |
