# Supplementary material
Source: PubMed Central journal article supplement (PMC7112117)
Supplement: mmc3.pdf [file mmc3.pdf]

**Supplementary Table 2. List of Transcription Factors in the Whole OL Cell Proteome**

| No. | Protein ID  | Protein name                                                                                                                       | L/H ratio |
|-----|-------------|------------------------------------------------------------------------------------------------------------------------------------|-----------|
| 1   | IPI00017617 | DDX5 Probable ATP-dependent RNA helicase DDX5                                                                                      | 0.49      |
| 2   | IPI00002502 | ATF3 Isoform 1 of Cyclic AMP-dependent transcription factor ATF-3<br>SRA1 cDNA FLJ30398 fis, clone BRACE2008402, highly similar to | 0.53      |
| 3   | IPI00102313 | Steroid receptor RNA activator 1<br>MED27 Isoform 1 of Mediator of RNA polymerase II transcription                                 | 0.56      |
| 4   | IPI00302652 | subunit 27                                                                                                                         | 0.65      |
| 5   | IPI00016746 | CBFB Isoform 1 of Core-binding factor subunit beta                                                                                 | 0.66      |
| 6   | IPI00001871 | PAWR PRKC apoptosis WT1 regulator protein                                                                                          | 0.67      |
| 7   | IPI00012575 | PIR Pirin                                                                                                                          | 0.71      |
| 8   | IPI00430812 | CNBP Isoform 1 of Cellular nucleic acid-binding protein                                                                            | 0.73      |
| 9   | IPI00008536 | YEATS4 YEATS domain-containing protein 4                                                                                           | 0.73      |
| 10  | IPI00000305 | MED11 Mediator of RNA polymerase II transcription subunit 11                                                                       | 0.73      |
| 11  | IPI00003505 | TRIP13 Isoform 1 of Pachytene checkpoint protein 2 homolog                                                                         | 0.73      |
| 12  | IPI00021997 | CREG1 Protein CREG1                                                                                                                | 0.79      |
| 13  | IPI00010833 | ZNF148 Zinc finger protein 148                                                                                                     | 0.8       |
| 14  | IPI00002806 | TAF12 Isoform TAFII20 of Transcription initiation factor TFIID subunit                                                             | 0.8       |
| 15  | IPI00251559 | RNF20 E3 ubiquitin-protein ligase BRE1A<br>SMARCD2 Isoform 1 of SWI/SNF-related matrix-associated actin-                           | 0.81      |
| 16  | IPI00853043 | dependent regulator of chromatin subfamily D member 2                                                                              | 0.81      |
| 17  | IPI00299413 | GABPA GA-binding protein alpha chain                                                                                               | 0.82      |
| 18  | IPI00011609 | UBE3A Isoform II of Ubiquitin-protein ligase E3A                                                                                   | 0.83      |
| 19  | IPI00895911 | CNBP cellular nucleic acid-binding protein isoform 2                                                                               | 0.83      |
| 20  | IPI00009958 | COPS5 COP9 signalosome complex subunit 5                                                                                           | 0.84      |
| 21  | IPI00299000 | PA2G4 Proliferation-associated protein 2G4                                                                                         | 0.84      |
| 22  | IPI00174852 | MED20 Mediator of RNA polymerase II transcription subunit 20                                                                       | 0.84      |
| 23  | IPI00018813 | COPS2 Isoform 2 of COP9 signalosome complex subunit 2                                                                              | 0.85      |
| 24  | IPI00060046 | TADA1 Transcriptional adapter 1                                                                                                    | 0.86      |
| 25  | IPI00165026 | SETD3 Isoform 1 of Histone-lysine N-methyltransferase setd3                                                                        | 0.86      |
| 26  | IPI00006552 | CNOT7 CCR4-NOT transcription complex subunit 7                                                                                     | 0.87      |
| 27  | IPI00008965 | JUN Transcription factor AP-1                                                                                                      | 0.87      |
| 28  | IPI00411886 | NOC2L Nucleolar complex protein 2 homolog                                                                                          | 0.87      |
| 29  | IPI00556494 | MED4 Mediator of RNA polymerase II transcription subunit 4                                                                         | 0.87      |
| 30  | IPI00024871 | CBFB Isoform 2 of Core-binding factor subunit beta                                                                                 | 0.87      |
| 31  | IPI00025807 | SP3 Isoform 1 of Transcription factor Sp3                                                                                          | 0.87      |
| 32  | IPI00000051 | PFDN1 Prefoldin subunit 1                                                                                                          | 0.88      |
| 33  | IPI00438229 | TRIM28 Isoform 1 of Transcription intermediary factor 1-beta                                                                       | 0.88      |
| 34  | IPI00004353 | GTF2A2 Transcription initiation factor IIA subunit 2                                                                               | 0.88      |
| 35  | IPI00012202 | WDR77 Methylosome protein 50                                                                                                       | 0.89      |
| 36  | IPI00010088 | HDAC4 Histone deacetylase 4                                                                                                        | 0.9       |
| 37  | IPI00247871 | TCERG1 Isoform 1 of Transcription elongation regulator 1                                                                           | 0.91      |
| 38  | IPI00015361 | PFDN5 Prefoldin subunit 5                                                                                                          | 0.91      |
| 39  | IPI00759832 | YWHAB Isoform Short of 14-3-3 protein beta/alpha                                                                                   | 0.91      |
| 40  | IPI00018840 | TRIP4 Activating signal cointegrator 1                                                                                             | 0.91      |
| 41  | IPI00100791 | GTF2H3 General transcription factor IIIH subunit 3                                                                                 | 0.91      |
| 42  | IPI00023919 | PSMC5 26S protease regulatory subunit 8                                                                                            | 0.92      |
| 43  | IPI00010136 | CTBP2 Isoform 2 of C-terminal-binding protein 2                                                                                    | 0.93      |
| 44  | IPI00002624 | PLRG1 Isoform 1 of Pleiotropic regulator 1                                                                                         | 0.94      |
| 45  | IPI00302238 | AATF Protein AATF                                                                                                                  | 0.94      |
| 46  | IPI00024802 | BTAF1 TATA-binding protein-associated factor 172                                                                                   | 0.94      |
| 47  | IPI00032911 | TBPL1 TATA box-binding protein-like protein 1                                                                                      | 0.95      |
| 48  | IPI00103554 | GATAD2B Transcriptional repressor p66-beta                                                                                         | 0.95      |
| 49  | IPI00005511 | PHF5A PHD finger-like domain-containing protein 5A                                                                                 | 0.95      |
| 50  | IPI00022477 | BCL10 B-cell lymphoma/leukemia 10<br>PSMD9 Isoform p27-L of 26S proteasome non-ATPase regulatory                                   | 0.95      |
| 51  | IPI00010860 | subunit 9                                                                                                                          | 0.96      |
| 52  | IPI00011698 | SAP18 histone deacetylase complex subunit SAP18                                                                                    | 0.96      |
| 53  | IPI00016839 | GTF2H4 General transcription factor IIIH subunit 4                                                                                 | 0.96      |
| 54  | IPI00289601 | HDAC2 Histone deacetylase 2                                                                                                        | 0.96      |
| 55  | IPI00007311 | MAFG Transcription factor MafG                                                                                                     | 0.97      |
| 56  | IPI00549248 | NPM1 Isoform 1 of Nucleophosmin                                                                                                    | 0.97      |
| 57  | IPI00979341 | AHCTF1P1;AHCTF1 Isoform 2 of Protein ELYS                                                                                          | 0.97      |
| 58  | IPI00010653 | REXO4 Isoform 1 of RNA exonuclease 4                                                                                               | 0.98      |

|     |             |                                                                                                                                   |      |
|-----|-------------|-----------------------------------------------------------------------------------------------------------------------------------|------|
| 59  | IPI00305068 | PRPF6 Pre-mRNA-processing factor 6                                                                                                | 0.98 |
| 60  | IPI00946154 | FGF2 Isoform 1 of Heparin-binding growth factor 2                                                                                 | 0.98 |
| 61  | IPI00020928 | TFAM Transcription factor A, mitochondrial                                                                                        | 0.99 |
| 62  | IPI00619930 | PUS1 Isoform 1 of tRNA pseudouridine synthase A, mitochondrial                                                                    | 1.01 |
| 63  | IPI00022208 | CEBPG CCAAT/enhancer-binding protein gamma<br>ARL2BP Isoform 1 of ADP-ribosylation factor-like protein 2-binding                  | 1.01 |
| 64  | IPI00015866 | protein                                                                                                                           | 1.02 |
| 65  | IPI00217540 | KDM1A Isoform 2 of Lysine-specific histone demethylase 1A<br>MED15 Isoform 1 of Mediator of RNA polymerase II transcription       | 1.02 |
| 66  | IPI00107693 | subunit 15                                                                                                                        | 1.02 |
| 67  | IPI00292537 | NFKB1 Isoform 2 of Nuclear factor NF-kappa-B p105 subunit                                                                         | 1.02 |
| 68  | IPI00295501 | CNOT8 CCR4-NOT transcription complex subunit 8                                                                                    | 1.02 |
| 69  | IPI00216318 | YWHAB Isoform Long of 14-3-3 protein beta/alpha                                                                                   | 1.03 |
| 70  | IPI00002993 | TAF9 Transcription initiation factor TFIID subunit 9                                                                              | 1.04 |
| 71  | IPI00012835 | CTBP1 C-terminal-binding protein 1                                                                                                | 1.04 |
| 72  | IPI00029629 | TRIM25 E3 ubiquitin/ISG15 ligase TRIM25                                                                                           | 1.04 |
| 73  | IPI00216746 | HNRNPK Isoform 2 of Heterogeneous nuclear ribonucleoprotein K                                                                     | 1.05 |
| 74  | IPI00063213 | MED30 Mediator of RNA polymerase II transcription subunit 30                                                                      | 1.05 |
| 75  | IPI00013174 | RBM14;RBM14-RBM4 Isoform 1 of RNA-binding protein 14                                                                              | 1.06 |
| 76  | IPI00640917 | TBL1X Isoform 1 of F-box-like/WD repeat-containing protein TBL1X<br>MAFK V-maf musculoaponeurotic fibrosarcoma oncogene homolog K | 1.07 |
| 77  | IPI00031018 | (Fragment)                                                                                                                        | 1.07 |
| 78  | IPI00555833 | MYEF2 Isoform 1 of Myelin expression factor 2                                                                                     | 1.07 |
| 79  | IPI00477494 | DRAP1 Uncharacterized protein<br>MED22 Isoform Surf5B of Mediator of RNA polymerase II transcription                              | 1.08 |
| 80  | IPI00018040 | subunit 22<br>SMARCE1 Isoform 1 of SWI/SNF-related matrix-associated actin-                                                       | 1.09 |
| 81  | IPI00017669 | dependent regulator of chromatin subfamily E member 1                                                                             | 1.09 |
| 82  | IPI00030481 | MED10 Mediator of RNA polymerase II transcription subunit 10                                                                      | 1.09 |
| 83  | IPI00007256 | ZHX2 Zinc fingers and homeoboxes protein 2                                                                                        | 1.11 |
| 84  | IPI00478128 | GATAD2A Uncharacterized protein                                                                                                   | 1.11 |
| 85  | IPI00513817 | PMF1;PMF1-BGLAP Isoform 5 of Polyamine-modulated factor 1                                                                         | 1.11 |
| 86  | IPI00013774 | HDAC1 Histone deacetylase 1                                                                                                       | 1.12 |
| 87  | IPI00027988 | CTCF Transcriptional repressor CTCF                                                                                               | 1.12 |
| 88  | IPI00011461 | STRN3 Isoform Beta of Striatin-3                                                                                                  | 1.12 |
| 89  | IPI00025346 | PEX14 Isoform 1 of Peroxisomal membrane protein PEX14                                                                             | 1.12 |
| 90  | IPI00644671 | CC2D1B Isoform 1 of Coiled-coil and C2 domain-containing protein 1B                                                               | 1.12 |
| 91  | IPI00152510 | DDX54 Isoform 2 of ATP-dependent RNA helicase DDX54                                                                               | 1.13 |
| 92  | IPI00234252 | SMARCC1 SWI/SNF complex subunit SMARCC1                                                                                           | 1.13 |
| 93  | IPI00792423 | MED24 Mediator of RNA polymerase II transcription subunit 24                                                                      | 1.13 |
| 94  | IPI00017292 | CTNNB1 Isoform 1 of Catenin beta-1<br>TAF6L TAF6-like RNA polymerase II p300/CBP-associated factor-                               | 1.14 |
| 95  | IPI00007957 | associated factor 65 kDa subunit 6L                                                                                               | 1.14 |
| 96  | IPI00165357 | MTA3 Isoform 1 of Metastasis-associated protein MTA3                                                                              | 1.14 |
| 97  | IPI00293655 | DDX1 ATP-dependent RNA helicase DDX1                                                                                              | 1.14 |
| 98  | IPI00218568 | PCBD1 Pterin-4-alpha-carbinolamine dehydratase                                                                                    | 1.15 |
| 99  | IPI00465248 | ENO1 Isoform alpha-enolase of Alpha-enolase                                                                                       | 1.15 |
| 100 | IPI00001364 | GCFC1 Isoform A of GC-rich sequence DNA-binding factor 1                                                                          | 1.15 |
| 101 | IPI00054042 | GTF2I Isoform 1 of General transcription factor II-I                                                                              | 1.16 |
| 102 | IPI00037599 | TFCP2 Isoform 1 of Alpha-globin transcription factor CP2                                                                          | 1.18 |
| 103 | IPI00140420 | SND1 Staphylococcal nuclease domain-containing protein 1                                                                          | 1.19 |
| 104 | IPI00643722 | ARID1A Isoform 1 of AT-rich interactive domain-containing protein 1A                                                              | 1.19 |
| 105 | IPI00022215 | ADNP Activity-dependent neuroprotector homeobox protein                                                                           | 1.19 |
| 106 | IPI00017450 | GTF2F1 General transcription factor IIF subunit 1                                                                                 | 1.19 |
| 107 | IPI00170596 | SIN3A Paired amphipathic helix protein Sin3a<br>CIQBP Complement component 1 Q subcomponent-binding protein,                      | 1.2  |
| 108 | IPI00014230 | mitochondrial<br>SMARCD1 Isoform 1 of SWI/SNF-related matrix-associated actin-                                                    | 1.21 |
| 109 | IPI00852816 | dependent regulator of chromatin subfamily D member 1                                                                             | 1.21 |
| 110 | IPI00017334 | PHB Prohibitin                                                                                                                    | 1.21 |
| 111 | IPI00031812 | YBX1 Nuclease-sensitive element-binding protein 1                                                                                 | 1.22 |
| 112 | IPI00171798 | MTA2 Metastasis-associated protein MTA2                                                                                           | 1.22 |
| 113 | IPI00419258 | HMGB1 High mobility group protein B1                                                                                              | 1.22 |
| 114 | IPI00216737 | MINA Isoform 1 of MYC-induced nuclear antigen                                                                                     | 1.22 |

|     |             |                                                                                                                                                        |              |
|-----|-------------|--------------------------------------------------------------------------------------------------------------------------------------------------------|--------------|
| 115 | IPI00024620 | ENY2 Enhancer of yellow 2 transcription factor homolog                                                                                                 | 1.26         |
| 116 | IPI00297113 | TRIM32 E3 ubiquitin-protein ligase TRIM32                                                                                                              | 1.26         |
| 117 | IPI00426640 | GTF2H2;GTF2H2C;GTF2H2D General transcription factor IIH subunit 2                                                                                      | 1.27         |
| 118 | IPI00302647 | CC2D1A Isoform 1 of Coiled-coil and C2 domain-containing protein 1A                                                                                    | 1.29         |
| 119 | IPI00003515 | TRIP11 Thyroid receptor-interacting protein 11                                                                                                         | 1.33         |
| 120 | IPI00184135 | E4F1 Transcription factor E4F1                                                                                                                         | 1.34         |
| 121 | IPI00221222 | SUB1 Activated RNA polymerase II transcriptional coactivator p15                                                                                       | 1.38         |
| 122 | IPI00639957 | CARM1 Isoform 3 of Histone-arginine methyltransferase CARM1                                                                                            | 1.39         |
| 123 | IPI00647008 | BRD7 Isoform 2 of Bromodomain-containing protein 7                                                                                                     | 1.39         |
| 124 | IPI00784414 | STAT3 Isoform 1 of Signal transducer and activator of transcription 3                                                                                  | 1.39         |
| 125 | IPI00845373 | NFKB2 Isoform 1 of Nuclear factor NF-kappa-B p100 subunit                                                                                              | 1.4          |
| 126 | IPI00104050 | THRAP3 Thyroid hormone receptor-associated protein 3<br>TRRAP Isoform 1 of Transformation/transcription domain-associated<br>protein                   | 1.4<br>1.45  |
| 127 | IPI00069084 |                                                                                                                                                        |              |
| 128 | IPI00018924 | HMG20A Isoform 1 of High mobility group protein 20A                                                                                                    | 1.45         |
| 129 | IPI00807545 | HNRNPK Isoform 3 of Heterogeneous nuclear ribonucleoprotein K<br>PBXIP1 Isoform 1 of Pre-B-cell leukemia transcription factor-interacting<br>protein 1 | 1.46<br>1.46 |
| 130 | IPI00332106 |                                                                                                                                                        |              |
| 131 | IPI00002895 | SUPT4H1 Transcription elongation factor SPT4                                                                                                           | 1.47         |
| 132 | IPI00419894 | CUX1 Isoform 3 of Homeobox protein cut-like 1                                                                                                          | 1.48         |
| 133 | IPI00218326 | SP100 Isoform Sp100-C of Nuclear autoantigen Sp-100                                                                                                    | 1.48         |
| 134 | IPI00022019 | SAP30 Histone deacetylase complex subunit SAP30                                                                                                        | 1.49         |
| 135 | IPI00010414 | PDLIM1 PDZ and LIM domain protein 1                                                                                                                    | 1.49         |
| 136 | IPI00300278 | MED8 Isoform 2 of Mediator of RNA polymerase II transcription subunit                                                                                  | 1.5          |
| 137 | IPI00021570 | EDF1 Isoform 1 of Endothelial differentiation-related factor 1                                                                                         | 1.52         |
| 138 | IPI00019226 | BRD8 Isoform 1 of Bromodomain-containing protein 8<br>MED16 Isoform 1 of Mediator of RNA polymerase II transcription<br>subunit 16                     | 1.54<br>1.55 |
| 139 | IPI00037401 |                                                                                                                                                        |              |
| 140 | IPI00784161 | SUPT6H Isoform 1 of Transcription elongation factor SPT6<br>SMARCA2 Isoform Long of Probable global transcription activator                            | 1.56<br>1.56 |
| 141 | IPI00514648 | SNF2L2                                                                                                                                                 | 1.56         |
| 142 | IPI00219097 | HMGB2 High mobility group protein B2                                                                                                                   | 1.57         |
| 143 | IPI00386120 | SF1 Isoform 6 of Splicing factor 1                                                                                                                     | 1.6          |
| 144 | IPI00852960 | USP22 Isoform 1 of Ubiquitin carboxyl-terminal hydrolase 22                                                                                            | 1.61         |
| 145 | IPI00018398 | PSMC3 26S protease regulatory subunit 6A                                                                                                               | 1.63         |
| 146 | IPI00289773 | CEBPB CCAAT/enhancer-binding protein beta                                                                                                              | 1.63         |
| 147 | IPI00829826 | MED1 Isoform 1 of Mediator of RNA polymerase II transcription subunit                                                                                  | 1.67         |
| 148 | IPI00025815 | TARDBP Isoform 2 of TAR DNA-binding protein 43                                                                                                         | 1.68         |
| 149 | IPI00477619 | C19orf2 Isoform 1 of Unconventional prefoldin RPB5 interactor                                                                                          | 1.68         |
| 150 | IPI00045051 | PURB Transcriptional activator protein Pur-beta                                                                                                        | 1.68         |
| 151 | IPI00871174 | MYCBP C-Myc-binding protein                                                                                                                            | 1.68         |
| 152 | IPI00013830 | SNW1 SNW domain-containing protein 1                                                                                                                   | 1.69         |
| 153 | IPI00004344 | AFF4 Isoform 1 of AF4/FMR2 family member 4                                                                                                             | 1.69         |
| 154 | IPI00008531 | RCOR1 REST corepressor 1                                                                                                                               | 1.71         |
| 155 | IPI00008991 | DR1 Protein Dr1                                                                                                                                        | 1.72         |
| 156 | IPI00031801 | CSDA Isoform 1 of DNA-binding protein A                                                                                                                | 1.72         |
| 157 | IPI00215911 | APEX1 DNA-(apurinic or apyrimidinic site) lyase                                                                                                        | 1.76         |
| 158 | IPI00012773 | MTA1 Isoform Long of Metastasis-associated protein MTA1                                                                                                | 1.76         |
| 159 | IPI00844193 | ZNF593 Zinc finger protein 593                                                                                                                         | 1.76         |
| 160 | IPI00028122 | PSIP1 Isoform 1 of PC4 and SFRS1-interacting protein                                                                                                   | 1.78         |
| 161 | IPI00412672 | PKN1 Isoform 2 of Serine/threonine-protein kinase N1                                                                                                   | 1.79         |
| 162 | IPI00216919 | YAP1 Isoform 1 of Yorkie homolog<br>MED17 Isoform 1 of Mediator of RNA polymerase II transcription<br>subunit 17                                       | 1.79<br>1.82 |
| 163 | IPI00301139 |                                                                                                                                                        |              |
| 164 | IPI00020956 | HDGF Hepatoma-derived growth factor                                                                                                                    | 1.83         |
| 165 | IPI00165434 | YLPM1 Isoform 4 of YLP motif-containing protein 1                                                                                                      | 1.86         |
| 166 | IPI00847689 | HTATIP2 Isoform 3 of Oxidoreductase HTATIP2                                                                                                            | 1.9          |
| 167 | IPI00792837 | ZNF207 zinc finger protein 207 isoform c                                                                                                               | 1.91         |
| 168 | IPI00003627 | ACTL6A Isoform 1 of Actin-like protein 6A                                                                                                              | 1.94         |
| 169 | IPI00154451 | MMS19 cDNA FLJ55586, highly similar to MMS19-like protein                                                                                              | 1.94         |
| 170 | IPI00328715 | MTDH Protein LYRIC<br>ZMYND8 cDNA FLJ55380, highly similar to Protein kinase C-binding<br>protein 1                                                    | 1.97<br>1.98 |
| 171 | IPI00418316 |                                                                                                                                                        |              |
| 172 | IPI00099497 | MAFF Transcription factor Maff                                                                                                                         | 2.03         |

|     |             |                                                                                                                                              |      |
|-----|-------------|----------------------------------------------------------------------------------------------------------------------------------------------|------|
| 173 | IPI00003369 | LIMD1 LIM domain-containing protein 1                                                                                                        | 2.03 |
| 174 | IPI00034069 | TFB2M Dimethyladenosine transferase 2, mitochondrial                                                                                         | 2.06 |
| 175 | IPI00386448 | RELA Isoform 1 of Transcription factor p65<br>MSRB2 Similar to Methionine-R-sulfoxide reductase B2, mitochondrial                            | 2.07 |
| 176 | IPI00032871 | precursor                                                                                                                                    | 2.11 |
| 177 | IPI00305304 | CERS2 Ceramide synthase 2                                                                                                                    | 2.13 |
| 178 | IPI00014513 | YY1 Transcriptional repressor protein YY1                                                                                                    | 2.16 |
| 179 | IPI00000685 | CDK7 Cyclin-dependent kinase 7                                                                                                               | 2.16 |
| 180 | IPI00556645 | FOXK1 Isoform 1 of Forkhead box protein K1                                                                                                   | 2.2  |
| 181 | IPI00012450 | NMI N-myc-interactor                                                                                                                         | 2.27 |
| 182 | IPI00024071 | HSF1 Isoform Long of Heat shock factor protein 1<br>MED18 cDNA FLJ51219, highly similar to Homo sapiens mediator of                          | 2.34 |
| 183 | IPI00305986 | RNA polymerase II transcription, subunit 18 homolog (MED18), mRNA                                                                            | 2.39 |
| 184 | IPI00742743 | TP53BP1 Isoform 2 of Tumor suppressor p53-binding protein 1                                                                                  | 2.46 |
| 185 | IPI00013439 | JUNB Transcription factor jun-B                                                                                                              | 2.8  |
| 186 | IPI00554711 | JUP Junction plakoglobin                                                                                                                     | 2.84 |
| 187 | IPI00025792 | SUPT3H Isoform 1 of Transcription initiation protein SPT3 homolog<br>STAT1 Isoform Alpha of Signal transducer and activator of transcription | 2.86 |
| 188 | IPI00030781 | 1-alpha/beta                                                                                                                                 | 3.05 |
| 189 | IPI00217357 | CCAR1 Isoform 1 of Cell division cycle and apoptosis regulator protein 1                                                                     | 3.08 |
| 190 | IPI00005181 | PLSCR1 Phospholipid scramblase 1                                                                                                             | 3.22 |
| 191 | IPI00218260 | NFIX Nuclear factor 1                                                                                                                        | 4.06 |
| 192 | IPI00024698 | PQBP1 Isoform 1 of Polyglutamine-binding protein 1                                                                                           | 4.11 |
| 193 | IPI00022348 | PML Isoform PML-1 of Protein PML                                                                                                             | 4.24 |
| 194 | IPI00023591 | PURA Transcriptional activator protein Pur-alpha                                                                                             | 4.41 |
| 195 | IPI00645192 | MECP2 Mutant methyl CpG binding protein 2 variant 1                                                                                          | 4.64 |
| 196 | IPI00005223 | SMAD9 Isoform A of Mothers against decapentaplegic homolog 9                                                                                 | 4.71 |
| 197 | IPI00011590 | FOSL1 Fos-related antigen 1                                                                                                                  | 6.33 |
| 198 | IPI00439948 | PPP1R13L Isoform 1 of RelA-associated inhibitor                                                                                              | 6.84 |
| 199 | IPI00299024 | BASP1 Isoform 1 of Brain acid soluble protein 1                                                                                              | 7.03 |
| 200 | IPI00016802 | SIRT1 NAD-dependent deacetylase sirtuin-1                                                                                                    | 7.27 |
| 201 | IPI00909569 | HDAC7 Isoform 8 of Histone deacetylase 7                                                                                                     | 9.65 |
